# Supplementary material
Source: PubMed Central journal article supplement (PMC6860971)
Supplement: NIHMS1057227-supplement-Supplementary_Material.pdf [file NIHMS1057227-supplement-Supplementary_Material.pdf]

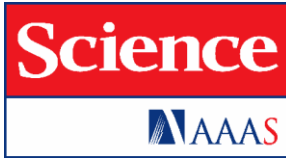

## Supplementary Materials for

### **Adaptive archaic introgression of copy number variants and the discovery of previously unknown human genes**

PingHsun Hsieh, Mitchell R. Vollger, Vy Dang, David Porubsky, Carl Baker, Stuart Cantsilieris, Kendra Hoekzema, Alexandra P. Lewis, Katherine M. Munson, Melanie Sorensen, Zev N. Kronenberg, Shwetha Murali, Bradley J. Nelson, Giorgia Chiatante, Flavia Angela Maria Maggiolini, H el ene Blanch e, Jason G. Underwood, Francesca Antonacci, Jean-Fran ois Deleuze, Evan E. Eichler\*

\*Corresponding author. Email: eee@gs.washington.edu

Published 18 October 2019, *Science* **366**, eaax2083 (2019)  
DOI: 10.1126/science.aax2083

#### **This PDF file includes:**

Materials and Methods  
Supplementary Text  
Figs. S1 to S71  
Captions for Tables S1 to S21  
References

**Other Supplementary Material for this manuscript includes the following:**  
(available at [science.sciencemag.org/content/366/6463/eaax2083/suppl/DC1](http://science.sciencemag.org/content/366/6463/eaax2083/suppl/DC1))

Tables S1 to S21 (.xlsx)

## 31 **Materials and Methods**

### 32 Genotyping single-nucleotide variants (SNVs) and indels for SGDP samples

33 Paired-end Illumina data for 266 fully public samples were downloaded via the Simons Genome Diversity  
34 Project (SGDP) (27). These data were aligned to human reference genome GRCh37 (hs37d5) using  
35 BWA-MEM (v0.7.12) as described in Mallick et al. (27). We applied the HaplotypeCaller function in  
36 Genome Analysis Toolkit (GATK, version: 3.5-0-g36282e4) to call variants in each SGDP sample  
37 separately using the following command. “java -Xmx25g -XX:+UseSerialGC -jar GenomeAnalysisTK.jar  
38 -T HaplotypeCaller -R hg19.fasta -variant\_index\_type LINEAR --variant\_index\_parameter 128000 -nct 5  
39 -D dbsnp\_138.b37.vcf --emitRefConfidence GVCF -rf BadCigar --min\_base\_quality\_score 20 -I  
40 SGDP\_sampleID.bam -o SGDP\_sampleID.gvcf”. We trained the VQSR model in GATK in order to  
41 recalibrate variant quality scores using “-an QD -an DP -an FS -an SOR -an ReadPosRankSum -an  
42 MQRankSum” and used `ts_filter_level` of 99.9.

43 To ensure genotype quality, we excluded variants that were 1) in low complexity regions  
44 (RepeatMasker, UCSC Genome Browser), 2) segmental duplications (SDs; WGAC, GRCh37), 3) in  
45 telomeric or centromeric regions (UCSC Genome Browser), 4) known indels with 10 bp flanking both  
46 ends, and 5) of quality score (QUAL) < 20. In addition, we removed variants that do not have valid  
47 human–chimpanzee alignment (53). Together these filters account for 378,779,062 autosomal bases in the  
48 genome. We identified a total of 34,532,567 autosomal SNVs in our SGDP samples after filtering. We  
49 noted that one of the East Asian samples (Daur\_HGDP01217\_M) has a missing genotype rate of 6.3%  
50 after filtering. Because we required that variants must be fully called in all of the downstream analyses  
51 and inferences, this sample was removed to maximize the number of sites remaining in our analyses.

52 We downloaded genotypes and BAM files for three published archaic hominin genomes—a  
53 Denisovan (25) and a Neanderthal from the Altai Mountains in Siberia (26) as well as a European  
54 Neanderthal from Croatia (24) via <http://cdna.eva.mpg.de/Neanderthal/>. Genotypes of this archaic panel  
55 of three genomes and the SGDP samples were combined using BCFtools (v1.5). An in-house Python  
56 script was supplied to ensure sites that are variable in one set, but missing in the other due to  
57 monomorphic in reference alleles, were properly merged. After merging, a total of 23,103,829 fully called  
58 autosomal SNVs remain in our data for downstream analyses.

### 60 Analysis of hominin-specific CNVs and shared CNVs between archaic and non-African samples

61 We performed an exploratory analysis to identify hominin-specific CNVs and those shared specifically  
62 between archaic and modern Eurasians. We applied the digital comparative genomic hybridization  
63 (dCGH) (9) CNV discovery method to a discovery panel of 20 publically available genomes, including  
64 the three archaic hominin and 17 diverse SGDP genomes, which were selected for their lowest variances

65 in sequencing coverage (9). Note that the FDR estimates for the dCGH calls for low-coverage genomes  
66 from the 1000 Genomes Pilot study (~4X and most reads with lengths <50 bp) are as low as 10% for a 1  
67 kbp variant, and for regions >10 kbp it reduces to <2% (54). Given that the three archaic genomes are  
68 high-coverage (>30X) and have longer read length (median read length >88 bp), we expect a lower FDR  
69 for archaic CNVs. We identified 5,135 CNVs in this discovery panel and determined each individual  
70 copy number by rounding to the nearest integer. To infer the ancestral copy number and the distribution  
71 of copy number in contemporary humans, we genotyped these CNVs in 72 nonhuman primate  
72 (chimpanzee, gorilla, and orangutan) and 249 SGDP genomes. We determined hominin-specific CNVs  
73 using a parsimony approach: a CNV is hominin-specific if all nonhuman primate samples are fixed in  
74 diploid copy number 2 (CN2), but it is variable in copy number in at least one of the hominin samples  
75 (archaic and modern humans). In addition, a CNV is specifically shared between archaic and non-African  
76 samples if it is hominin-specific and at least one copy number (CN) genotype is only found in archaic and  
77 non-African Eurasian samples. The significances of the numbers of hominin-specific and archaic-and-  
78 non-African-specifically-shared CNVs were tested using 100,000 permutation simulations.

79

#### 80 Structural variant calling and genotyping

81 To generate a maximally sensitive set of copy number variants (CNVs) in the SGDP samples, we carried  
82 out CNV calling for each sample using WHAMG (55), LUMPY (v0.2.13) (56), DELLY2 (v0.7.2) (57),  
83 digital comparative genomic hybridization (dCGH) (9), and Genome STRiP (v2.00.1611) (58). In short,  
84 while dCGH computationally infers copy numbers based on read-depth information across repeat-masked  
85 genomes, the others identify CNVs using read-mapping information, such as discordant reads, soft-  
86 clipped reads, and/or unmapped reads, etc. To identify CNVs in the three archaic genomes, we were able  
87 to apply dCGH (9), but not the other approaches, to each of these genomes. This is primarily for two  
88 reasons: <0.5% reads of these archaic genomes are paired-end reads and there are no unmapped reads in  
89 these downloaded BAM files. Read-depth profiles for the three archaic genomes were generated by  
90 realigning the BWA-MEM aligned reads to the reference genome using mrsFAST-ultra (59). GC-  
91 corrected read-depth coverage across the genome was done through a regression procedure previously  
92 described in Sudmant et al. (9).

93 Deletions, duplications, inversions and CNVs identified by the five CNV callers were merged  
94 with 'mergeSVcallers' (<https://github.com/zeeev/mergeSVcallers>; commit: 746c6d2). This method  
95 merges CNVs by type, requiring that the start and end of the overlapping CNV begin and finish within  
96 1,000 bp of one another with a reciprocal overlap of 60%. One iteration of merging was done to avoid  
97 collapsing unique alleles into the same call. Unless mentioned otherwise, we genotyped CNVs using the  
98 sequence read-depth genotyper (54) and integrated the call set for the entire panel of samples. CNVs <50

99 bp or >10 Mbp were excluded because of poor genotyping quality. We further constructed a conserved  
100 CNV call set of 19,211 variants by only including CNVs if they (i) are identified by at least two different  
101 CNV callers and/or dCGH because of its low false discovery rate and unique ability to infer aggregate  
102 paralogous copy number in repetitive regions (9), (ii) have missing genotype rates <0.1, (iii) are  
103 polymorphic in copy number across samples, and (iv) have >500 unmasked bases in sequence.

104

### 105 Population structure

106 Population structure within the SGDP samples was examined using both ADMIXTURE (v1.23) (51). For  
107 these analyses, we excluded variants with minor allele frequency < 0.01, thinned the data (--thin 0.2), and  
108 pruned linked variants (--indep-pairwise 50 10 0.1) using PLINK (v1.9), resulting in 264,848 SNVs.

109 ADMIXTURE analyses were applied using the number of ancestral populations (K) between 2 and 12  
110 and using fivefold cross-validation and 20 bootstrapping replicates for each K. Based on the results of  
111 ADMIXTURE (K = 5 – 8) and geographic locations, we noted that seven African samples—  
112 Somali\_Ayodo81S\_F, MasaiMKK\_NA21490\_M, MasaiMKK\_NA21581\_M, Mozabite\_HGDP01253\_M,  
113 Mozabite\_HGDP01274\_F, Saharawi\_SAH31\_M, and Saharawi\_SAH41\_M—were estimated to have 25–  
114 77% Eurasian ancestries and were excluded from downstream analyses. We grouped the SGDP samples  
115 into eight focal populations: sub-Saharan Africans (AFR, n=33), Native Americans (AMR, n=20), East  
116 Asians (EA, n=47), Europeans (EUR, n=51), Melanesians (MEL, n=16), Middle Easterners (ME, n=22),  
117 South Asians (SA, n=38), and Siberians (SIB, n=22) for downstream population genetic inferences. We  
118 also did not further analyze the two Australian and six other Oceanian samples due to limited sample  
119 sizes.

120

### 121 Demographic inferences

122 To infer the demographic history of Melanesians, we used  $\partial a \partial i$  (50) to build and fit demographic models  
123 for the population trio of AFR-EA-MEL. To ensure genotype quality for proper demographic inferences,  
124 we further excluded data in UCSC Genome Browser Self Chain database (if sequence identity >90%) as  
125 well as any known/called structural variants (Database of Genomic Variants, as of September 2016). To  
126 avoid possible biases in our demographic inferences due to natural selection, we also excluded coding  
127 sequences with 1000 bp flanking on both ends (RefSeq genes database from UCSC Genome Browser,  
128 downloaded September 2016). This results in an unfolded, non-genic joint allele frequency spectrum  
129 (AFS) of 3,632,680 SNVs from 409,234,894 autosomal bases, polarized using human–chimpanzee  
130 alignment (53).

131 A variety of models for a population trio were considered. We added an additional parameter,  
132  $P_{flip}$ , in each model to account for the fraction of sites in the data, whose ancestral states are misidentified.

133 We estimated demographic parameters using derivative-based BFGS and fmin algorithms implemented in  
134 SciPy to optimize the composite likelihood. We used the Godambe information matrix to estimate the  
135 confidence intervals for model parameters and to adjust the statistics of likelihood ratio tests for model  
136 selection (60). The Godambe information matrix of each AFS was calculated through 100 bootstrap  
137 replicates generated from nonoverlapping 1 Mbp regions across the entire genotype data. All parameter  
138 point estimates reported in physical units were converted using a mutation rate of  $1.5 \times 10^{-8}$  per base per  
139 generation (61) and a generation time of 29 years.

140

#### 141 Coalescent simulations

142 We used MaCS (62) to carry out whole-genome coalescent simulations. To explicitly account for local  
143 mutation rate heterogeneity in the genome, we followed the framework published in (63). Briefly, it is a  
144 three-step procedure. First, we estimated the population genetic mutation parameter  $\hat{\theta}_j$  using  $\partial a \partial i$  for each  
145 locus of 25,000 bases under the best-fit demographic model. We then simulate genomes using MaCS with  
146 a mutation parameter  $\hat{\theta}_{max}$ , the largest  $\theta$  estimated among all of the windows. Finally, for each locus we  
147 adjusted its mutation rate by dropping  $1 - (\frac{\hat{\theta}_j}{\hat{\theta}_{max}})$  of the simulated variants. To simulate recombination  
148 variation across the genome, we incorporated HapMap recombination map in our simulations (64).

149 For all of the models we simulated, in addition to the three populations in each of the population  
150 trios, we also included the chimpanzee (n=1), the Siberian (Altai Neanderthal, NDL Altai, n=1) and  
151 European (Vindija Neanderthal, NDL Vindija, n=1) Neanderthal, and the Denisovan (DNS, n=1)  
152 branches (**Figure S8**). Confidence intervals and point estimates for these relevant demographic  
153 parameters were drawn from previous studies (**Table S8**). For each simulation, to account for  
154 uncertainties in parameter estimates we randomly sampled values from the confidence interval of each  
155 parameter, assuming that they had a multivariate normal distribution. Whenever conversions between  
156 genetic and physical units for parameters are required, we used a mutation rate and a generation time  
157 randomly drawn from  $[1 \times 10^{-8}, 2 \times 10^{-8}]$  per site, per generation (61) and [25, 30] years (65).

158

#### 159 Tests for natural selection, archaic introgression, and population-stratified CNVs

160 To identify population-stratified CNVs, we used three statistics comparing between two groups: a focal  
161 population and the rest of the SGDP samples. First, we computed  $V_{ST}(focal, allOthers) = (1 - \frac{V_S}{V_T})$ ,  
162 where  $V_S$  and  $V_T$  are the weighted mean and total variances of the two groups, respectively (66). For each  
163 CNV,  $V_{ST}$  falls between 0 and 1 and the larger it is, the more difference the two groups are in copy  
164 number. Second, we compared the distributions of copy numbers in the two groups using the Mann-  
165 Whitney U (*MWU*) test (two-sided test). Finally, we calculated the statistic  $D_{median} := |M(\text{integer CN},$

166 focal) – M(integer CN, allOthers) |, where M(integer CN, group) is the median copy number in integer  
 167 form for a group. We determined a CNV is population-stratified in a focal population if (i)  $V_{ST} > 0.1$ ,  
 168 (ii) Bonferroni p of the *MWU* test  $< 0.05$ , and (iii)  $D_{median} > 0.5$ .

169 We further look for evidence for selection and introgression using multiple population genetic  
 170 statistics and SNVs from sequences flanking population-stratified CNVs. To search for evidence of  
 171 positive selection in a focal population, we computed population branch statistic (*PBS*) (2) and extended  
 172 haplotype homozygosity (EHH) (67) for each focal population. We applied BEAGLE v4.1 (68) to phase  
 173 haplotypes in both real and simulated data to account for possible biases due to phasing errors. To detect  
 174 signatures of archaic introgression, we used the  $f_D$  (30), which is designed specifically to find loci with  
 175 excess ancestry sharing with an archaic population due to admixture. Following the definition of Martin et  
 176 al. (30), we defined the population relationships among three SGDP populations and an outgroup  
 177 (chimpanzee) to be  $((P1, P2), P3), O := (((AFR, focal), ARC), Chimpanzee)$ , where  $ARC \in \{DNS$   
 178  $(n=1), NDL (n=2)\}$ . We calculated the estimator for  $f_D$  using the derived allele frequency  $f$  (with respect  
 179 to the ancestor of chimpanzees and humans) at site  $i$  as the following:

$$\widehat{f}_D = \frac{S(((P1,P2),P3),Outgroup)}{S(((P1,X),X),Outgroup)}$$

181  
 182 Population-stratified CNVs

183 We are interested in identifying variants in a human population that significantly differ in copy number  
 184 because selection might have driven the observed differentiation. Because the SGDP samples are from  
 185 more than 100 diverse populations, we carried out ADMIXTURE to help delineate population  
 186 relationships. While the ADMIXTURE analysis suggests that our samples are mostly represented by sub-  
 187 Saharan African, Native American, East Asian, Sahul Oceanian, and Western Eurasian ancestries (**Figure**  
 188 **S4**), we noticed that three additional populations, including South Asians, Siberians, and Middle  
 189 Easterners, can be further separated from the others. In addition, two Australian and six other Oceanian  
 190 samples were excluded from further analyses due to limited sample size. Thus, for the rest of analyses, we  
 191 grouped the SGDP samples into eight focal populations: sub-Saharan Africans (AFR, n=33), Native  
 192 Americans (AMR, n=20), East Asians (EA, n=47), Europeans (EUR, n=51), Melanesians (MEL, n=16),  
 193 Middle Easterners (ME, n=22), South Asians (SA, n=38), and Siberians (SIB, n=22). Note that seven  
 194 African samples were excluded due to high Eurasian ancestries (>22%) (**Methods**), which can confound  
 195 downstream population genetic inferences.

196 To identify population-stratified CNVs, we used three statistics comparing each focal population  
 197 with the remaining global population samples: (i)  $V_{ST}$ , a measurement of copy number variation;  
 198 (ii) *MWU* test, comparing the distributions of copy numbers; and (iii)  $D_{median}$ , quantifying the average

199 difference in copy number (**Methods**). These three statistics quantify the differences in copy number  
 200 between a focal population and all the other SGDP samples. In all cases, we found less than 10% of the  
 201 CNVs with  $V_{ST} > 0.1$ , Bonferroni  $p$ -value of the  $MWU$  test  $< 0.05$ , or  $D_{median} > 0.5$  (**Figure S5**). Note that  
 202 while we found little to no correlation between the sample sizes of the focal populations and the numbers  
 203 of stratified CNVs identified by  $V_{ST}$  (Pearson's correlation = -0.16,  $p = 0.699$ ) and  $MWU$  (Pearson's  
 204 correlation = -0.19,  $p = 0.638$ ), those identified by  $D_{median}$  do negatively correlate with sample sizes  
 205 (Pearson's correlation = -0.73,  $p = 0.039$ ). To conservatively determine if a CNV is stratified in a focal  
 206 population, we used the following criteria: (i)  $V_{ST} > 0.1$ , (ii) Bonferroni  $p$ -value of the  $MWU$  test  $< 0.05$ ,  
 207 and (iii)  $D_{median} > 0.5$  (**Figure S6**). While the numbers of stratified CNVs vary among focal populations  
 208 (**Figure S6; Table S5**), we found that in all cases, under the null expectation it is highly unlikely to  
 209 observe the number of population-stratified CNVs ( $p$ -values  $< 0.0105$ , 10,000 non-parametric  
 210 permutation simulations; **Table S5**). Our analysis suggests that these candidates are unlikely to be false  
 211 positives due to sampling errors. Intriguingly, Melanesians carry the largest number of highly stratified  
 212 CNVs ( $n = 162$ ) among the eight focal populations despite having the smallest sample size (**Table S5**),  
 213 most likely due to increasing statistical power in a more homogeneous group than other focal populations.

214

215 , where  $S(((P1, P2), P3), Outgroup) = \sum_i C_{(((A,B),B),A)}(i) - C_{(((B,A),B),A)}(i)$ , and

$$216 \quad C_{(((A,B),B),A)}(i) = (1 - f_{i,P1}) \times f_{i,P2} \times f_{i,P3}$$

$$217 \quad C_{(((B,A),B),A)}(i) = f_{i,P1} \times (1 - f_{i,P2}) \times f_{i,P3}$$

218

219 In theory, the function  $S$  reaches its maximum when the population P2 is completely replaced by  
 220 the P3 lineage or vice versa, and thus the  $X$  in the denominator is dynamically determined for each site as  
 221 which of P2 and P3 has the highest derived allele frequency. In addition, we also applied  $S^*$  (49), which  
 222 utilizes linkage information, to detect archaic introgression. To increase statistical power and identify  
 223 candidate regions for selection and/or archaic introgression, all test statistics were calculated and  
 224 summarized using predefined windows of 100 SNVs, with a sliding size of 50 SNVs. We assessed the  
 225 statistical significance of our inferences using coalescent simulations and calculated all test statistics for  
 226 windows in simulated data that are homologous to those in the real data. The  $p$ -value of each window was  
 227 defined as the fraction of simulations with test statistic values greater than or equal to the observed value  
 228 in the real data. A test for a window is significant if its  $p$ -value  $< 0.05$ .

229 We used BEAGLE v4.1 phased SNVs (and the bi-allelic CNV if desired) from the putative  
 230 unique (copy number [CN] = 2) sequences flanking a candidate CNV in order the study the haplotype  
 231 pattern among the samples. To summarize the pattern of haplotypes, we used SNVs with  $PBS > 0.5$  to  
 232 further classify each haplotype into a specific haplogroup, where the pairwise mutation distance is at most

233 5. To simplify our inferences and ease the complexity of display, in most of cases we focused on the first  
234 four major haplogroups and pull the rest of haplotypes into the “others” group.

235

### 236 Population genetic inferences

237 We used the method of Thomson et al. (69) to estimate the time to most recent common ancestor  
238 (TMRCA) for each candidate archaic introgressed locus, assuming that a divergence of 6 million years  
239 between human and chimpanzee and a generation time of 29 years (65).

240 To examine if the sharing of this duplication polymorphism between Melanesian and Denisovan  
241 is a result of incomplete lineage sorting (ILS) or recent gene flow, we reconstructed haplotypes for the  
242 duplication polymorphic site in the Melanesian and Denisovan short-read genomes. Reads were re-  
243 mapped to the assembled Melanesian contig, along with GRCh37 and KV880768.1, the contig of the  
244 ancestral locus of DUP<sub>16p12</sub>. To ensure enough Denisovan sequence coverage on the assembled  
245 Melanesian contig, we focused on sequences with at least five Denisovan reads with MAPQ >30. For  
246 simplicity, we focused on ~10 kbp sequences at the unique portion of the duplication locus (yellow arrow  
247 within the red-dashed box in **Figure 3**), where eight SNVs were called using FreeBayes (v1.0.2).  
248 Haplotypes were inferred by applying BEAGLE (v4.1) to these SNVs along with a bi-allelic CNV.  
249 Phylogeny and divergence for these 10 kbp sequences, along with homologous sequences from GRCh37  
250 and published nonhuman great ape assemblies (53) were inferred using Thomson’s TMRCA estimator  
251 and BEAST (v2.5.0).

252 To test ILS, we calculated the probability of observing a sequence of  $L_{obv}$  bases shared between  
253 modern and archaic humans using a model of sequence decay over time (6). In short, under a model of  
254 ILS and neutral evolution, the expected length  $L_{exp}$  of a shared sequence between two populations  
255 separated by  $t$  generations is  $1/(r \times t)$ , where  $r$  is the recombination rate per base per generation of the  
256 locus. The length distribution of the shared sequence evolved in the two lineages is a sum of two  
257 exponential distributions, which follows a Gamma distribution with shape parameter 2 and rate parameter  
258  $1/L_{exp}$ . Thus, the probability of sharing a sequence of  $L_{obv}$  due to ILS is

$$259 \quad 1 - CDF\left\{Gamma\left(L_{obv}, shape = 2, rate = \frac{1}{L_{exp}}\right)\right\}$$

260 To test if the observation of the high frequency DEL<sub>MEL-NDL</sub> deletion-linked variant in Melanesians is  
261 likely a result of positive selection, we used coalescent simulations under the best-fit demographic models  
262 and conditional on variants with a similar age to the DEL<sub>MEL-NDL</sub> allele. Specifically, we computed the  
263 expected distribution of *PBS* values for those with derived allele frequency being within 30% of the  
264 frequency of the DEL<sub>MEL-NDL</sub> deletion allele observed among the sampled Melanesian chromosomes (i.e.,  
265 0.306–0.568). We determined the significance of the selection signal by computing the rank of the



266 observed *PBS* of DEL<sub>MEL-NDL</sub> in the distributions generated using simulations from the Melanesians,  
267 Africans, and East Asians.

268

### 269 Phylogenetic analyses

270 To infer the phylogenetic relationships for loci of interest in primates, we performed both maximum  
271 likelihood (RAxML, v.8.2.10) and Bayesian phylogenetic-based (BEAST v2.5.0) (71) analyses. For  
272 RAxML, we used the command “-m GTRGAMMA -f a -x 13345 -N autoMRE -p 14801”. To run  
273 BEAST, we used 1) HKY, with GAMMA Category Count = 5, for the Site Model and 2) random local  
274 clock for Clock Model to explicitly test mutation rate on individual branch in the tree. For tree priors, we  
275 tested both Calibrated Yule Model (if desired) and Coalescent Bayesian Skyline model for individual  
276 phylogenetic analyses. While we kept most of the parameters of the priors as default, for the prior  
277 distributions of clock rate, we used Gamma(0.001, 1000) and human–chimpanzee or human–rhesus  
278 macaque divergence as the calibration using a log-normal(M=1.8, S=0.12) or log-normal(M=3.35,  
279 S=0.085) distribution, respectively. For each locus, we performed five independent runs to infer the  
280 phylogeny using a chain length of 50,000,000 samples and recorded every 2,000 samples. We used the  
281 accompany program Tracer (v.1.7.1) to determine the quality of each run and, in general, we used the first  
282 10% as burn-in. All phylogenetic trees were plot using Figtree (v1.4.3).

283 To test signals of selection among RNA transcripts, we used the codon substitution model,  
284 codeml, in the PAML package (v14.9) (43). To construct a frame-aware sequence alignment for PAML,  
285 we first translated predicted open reading frame (ORF) sequences into amino acid sequences, followed by  
286 performing amino acid alignment using MAFFT (v7.407) (72), which was then used to build the frame-  
287 aware sequence alignment using the Perl program pal2nal.pl (v14) (73). We began with the computation  
288 of pairwise  $dN/dS$  ( $\omega$ ) ratios (PAML with runmode=-2, CodonFreq=2) and estimated their 95%  
289 confidence intervals (C.I.) using 1,000 bootstraps constructed by sampling the codons of the input  
290 sequence alignment, as described in (43, 74, 75). To search for evidence for positive selection acting on  
291 sites along particular lineages or clades, we performed likelihood ratio tests using the following models:  
292 (i) the free-ratio model (model=1) vs. strictly neutral model (model=0, fix\_omega=1, omega=1); (ii)  
293 branch-site test of positive selection (model=2, NSsites=2, fix\_omega=0) against the null model  
294 (model=2, NSsites=2, fix\_omega=1, omega=1); (iii) branch-site clade model C (model=3, NSsites=2)  
295 against the null model (model=0, NSsites=1) (43, 76). The input phylogenetic tree was inferred using  
296 BEAST (v2.5.0) as described above. The probability of a site being under positive selection was  
297 calculated using Bayes empirical Bayes (BEB) (43).

298

299 PCR-based validation for the Neanderthal–Melanesian-shared chromosome 8p21.3 deletion

300 We created a PCR-based assay to test for the presence of the chromosome 8p21.3 deletion at the  
301 approximate position chr8:22981814-22988247 based on read-depth estimates from the SGDP data.  
302 Primers were designed to flank this deletion and would create a PCR product of a few hundred base pairs  
303 if the deletion was present in the individual. The set of primers were located at chr8:22982187  
304 (atctcgactcaccacaacgctc) and chr8:22988614 (catgttgaaatgagaaaagttgg) and in individuals with the  
305 deletion, it creates a PCR product that is 501 bp. Sequencing this product and aligning to the human  
306 reference (GRCh37) gives the actual breakpoints of the deletion at chr8:22982302-22988251 (5,950 bp).  
307 A second set of primers were designed within the deletion region to test for presence (Forward:  
308 gttggcagtgtgaggttg, Reverse: caccaccagaaggacaact), which amplifies a 300 bp fragment from  
309 chr8:22987306-22987605. With a combination of these two PCR assays, we can determine the copy  
310 number of individuals for this deletion: PCR product for the first assay will indicate at least one  
311 chromosome has the deletion and PCR product for the second assay will indicate at least one chromosome  
312 does not have the deletion. We applied this assay to 16 blood-derived DNA Melanesian samples and  
313 reported the results (**Figure S56**).

314

315 Fluorescence *in situ* hybridization (FISH) experiments

316 Metaphase spreads and interphase nuclei were obtained from lymphoblast cell lines from four human  
317 HapMap individuals. Three were Papuans from Bougainville Island (GM10541, GM1543 and GM10539)  
318 while one was the Caucasian (EUR) individual GM12878, used as control. All these cell lines were  
319 purchased from Coriell Cell Repository. FISH experiments were performed using human fosmid and  
320 bacterial artificial clones (BACs) (**Table S13**) directly labeled by nick-translation with Cy3-dUTP  
321 (Perkin-Elmer), Cy5-dUTP (Perkin-Elmer) and fluorescein-dUTP (Enzo) as described by Lichter et al.  
322 (77), with minor modifications. Briefly, 300 ng of labeled probe were used for the FISH experiments;  
323 hybridization was performed at 37°C in 2xSSC, 50% (v/v) formamide, 10% (w/v) dextran sulphate and 3  
324 mg sonicated salmon sperm DNA, in a volume of 10 mL. Posthybridization washing was at 60°C in  
325 0.1xSSC for three times. Nuclei were simultaneously DAPI stained. Digital images were obtained using a  
326 Leica DMRXA2 epifluorescence microscope equipped with a cooled CCD camera (Princeton  
327 Instruments). DAPI, Cy3, Cy5 and fluorescein fluorescence signals, detected with specific filters, were  
328 recorded separately as grayscale images. Pseudo-coloring and merging of images were performed using  
329 Adobe Photoshop software.

330

331 DNA sample preparation and whole-genome sequencing using PacBio technology

332 Sample HGDP00550 was chosen from the HGDP-CEPH (Human Genome Diversity Project-Centre  
333 d'Étude du Polymorphisme Humain) panel for long-read sequencing, and frozen cells were provided by  
334 the CEPH. DNA was isolated as previously described (53) and genomic libraries were prepared for DNA  
335 sequencing. For PacBio sequencing, we prepared one DNA fragment library (40–50 kbp inserts) using  
336 Megaruptor (Diagenode) shearing at the 60 kbp setting. After SMRTbell preparation per the “Procedure  
337 & Checklist - Preparing >30 kb Libraries Using SMRTbell® Express Template Preparation Kit”  
338 (PacBio), the library was size-selected with the BluePippin™ system (Sage Science) at a minimum  
339 fragment length cutoff of 40 kbp. Single-molecule, real-time (SMRT) sequence data were generated using  
340 the PacBio Sequel instrument with Sequel Binding and Internal Ctrl Kit 2.1, Sequel Sequencing Kit 2.1  
341 v2, MagBead cleanup, diffusion loading, and acquisition times of 10- or 20-hour movies. A total of 22  
342 SMRT Cell 1M v2 and 3 SMRT Cell 1M v2 LR cells were processed yielding 73.8-fold (ROI/3.2 G) or  
343 75.2-fold (raw/3.2G) whole-genome sequence data. The average subread length was 18.2 kbp with a  
344 median subread length of 12.9 kbp and N50 subread length of 34.8 kbp.

345

346 Identification of integration site for the Melanesian–Denisovan-specific 16p12.2 duplication

347 To identify the putative integration site, we constructed pseudo mate-pair reads using long-read data  
348 extending over duplication junctions at 16p12.2 (**Figure S40**). Specifically, we set to split individual long  
349 reads using an initial window size of 5 kbp and a step size of 1 kbp. Consider hypothetical PacBio read of  
350 length 12 kbp, we split this read such that we create a 5 kbp portion on the left and leaving the rest of the  
351 PacBio read (7 kbp) on the right. Then we move the cut site by 1 kbp to the right creating the left portion  
352 of the PacBio read of 6 kbp and the other 6 kbp portion on the right. We iterated this procedure until the  
353 right mate read equaled 5 kbp. The resulting pseudo mate-pairs were then mapped to the reference  
354 genome (hg38) in a paired-end fashion using BWA-MEM (version 0.7.15-r1140) with ‘-x pacbio’  
355 parameter. The putative integration site of this duplication was identified by discordant read pairs.  
356 Finally, we used Canu (v1.5) and the following command to assemble contigs with long reads showing  
357 mapping evidence to chromosome 16p11.2:

358

```
359 canu -pacbio-raw $1 genomeSize=50000 corOutCoverage=300 corMhapSensitivity=high  
360 corMinCoverage=1 gnuplotTested=true -p outFile useGrid=false -d outFile contigFilter="2 20000 1.0 .75  
361 2”
```

362

363 BAC library construction, processing, and assembly

364 GM10539, a Melanesian cell line from Coriell, was grown to  $10^8$  cells and embedded in agarose plugs,  
365 then lysed. Plugs are partially digested with ECOR1, run on pulsed field gel and slices from 100-200 kbp  
366 are cut. DNA is electro-eluted, ligated, and transformed into *E. coli* cells. 350,000 clones are picked by  
367 Norgren picker into 96 well plates for a 10X BAC library and stamped onto Performa II Genetix filters.

368 Probes for regions of interest were designed, radioactively labeled and hybridized to the Performa  
369 filters, washed, exposed to Phosphor screens, and scanned on Typhoon scanner. Positives are called and  
370 corresponding clones picked from the BAC library.

371 DNA from positive BAC clones were extracted as described previously (41). We prepared  
372 barcoded libraries from clone DNA using Illumina-compatible Nextera DNA sample prep kits  
373 (Epicentre, catalog number GA09115) as described previously (37) and carried out paired-end  
374 sequencing (125 bp reads) on an Illumina HiSeq 2500. Reads were then mapped to the reference  
375 genome, GRCh37, to identify singly unique nucleotide k-mers (SUNKs) (54). Non-overlapping BACs  
376 were pooled and sheared as described previously (41). Libraries were processed using the PacBio  
377 SMRTbell Template Prep kit following the protocol “Procedure and Checklist—20 kb Template  
378 Preparation Using BluePippin Size-Selection System,” with the addition of barcoded adaptors during  
379 ligation. Up to ten barcoded libraries were then pooled at equimolar amounts and size-selected as a  
380 pool on the Sage PippinHT with a start value of 10,000–12,000 and an end value of 50,000. The  
381 resulting library was then sequenced on one Sequel SMRT cell 1M by diffusion using Sequel v3.0  
382 chemistry. We performed *de novo* assembly of pooled BAC inserts using Canu (v1.5). Reads were  
383 masked for vector sequence (pCC1BAC) and assembled with Canu, then subjected to consensus  
384 sequence calling with Arrow (<https://github.com/PacificBiosciences/GenomicConsensus>). We  
385 reviewed PacBio assemblies for misassembly by visualizing the read depth of PacBio reads in  
386 Parasight (<http://baileylab.brown.edu/parasight/download.html>), using coverage summaries generated  
387 during the resequencing protocol.

388

389 Assembly of the Melanesian 16p11.2 contig using Segmental Duplication Assembler (SDA)

390 Assembly of the Melanesian–Denisovan DUP<sub>16p12</sub> duplication polymorphism at the 16p11.2 insertion site  
391 was accomplished using a pipeline based on the SDA method (<https://github.com/mvollger/SDA>) (41).  
392 Initially, long-read whole-genome data were mapped to a BAC haplotype (222 kbp) containing the core  
393 of the DUP<sub>16p12</sub> duplication polymorphism. After this, paralogous sequence variants (PSVs) specific to the  
394 integration site were identified using SDA and reads containing these PSVs were phased and assembled  
395 resulting in a 252 kbp contig. Because the contig expanded upon the original BAC haplotype by 30 kbp,  
396 we repeated the experiment using the 252 kbp contig as the backbone. SDA was applied to the 252 kbp

397 contig and two of the resulting contigs shared 44/44 and 59/59 PSVs with the original backbone and  
398 extended the contig on the left and right side, respectively. This process was then iteratively reapplied to  
399 further extend the contig to an ultimate length of 787 kbp (**Table S14**), at which point it could be  
400 confidently overlapped with other locally assembled contigs, resulting in a ~1.8 Mbp contig.

401

#### 402 PCR validation for the Melanesian–Denisovan-specific duplication at chromosome 16p12.2

403 In order to validate the presence or absence of the chromosome 16 Melanesian-Denisovan introgressed  
404 duplication variant, we developed a series of PCR and restriction enzyme assays. Across a 75 kbp region  
405 of the duplication (chr16:22,710,041-22,783,558), there were SNVs previously identified (9) that are  
406 present in the duplicated copy from Denisovan and are fixed alternatives from the human reference.  
407 Designing assays specific to these SNVs will allow us to identify which Melanesians have this  
408 duplication. We selected and tested 11 SNV sites across the 75 kbp duplicated region that show an  
409 alternate allele for the Papuans (matching the Denisovan allele) and are fixed for the reference allele in  
410 the control samples.

411 We designed PCR assays to amplify approximately 300 bp surrounding each of these sites and  
412 were able to successfully amplify and Sanger sequence those fragments in two Melanesians and three  
413 control samples (**Tables S19-S20**). We then selected three sites to create a restriction digests test, wherein  
414 we would select restriction enzymes that would cut our PCR product over the SNV site and nowhere else  
415 within the amplicon. Enzymes were found using NEB's product search tool and experiments followed the  
416 standard protocols listed by NEB. For site 13, we used AciI, which cuts the reference haplotype, creating  
417 fragments of 157 bp and 144 bp (and uncut = 301 bp). For site 22773497, we used MscI, which cuts the  
418 alternate (Papuan) haplotype, creating fragments 149 bp and 147 bp (uncut = 296 bp). For site 22768213,  
419 we used BsrDI, which also cuts the alternate (Papuan) haplotype, creating fragments 107 bp and 191 bp  
420 (uncut = 298 bp). The digested samples were visualized on a 2% agarose gel to visualize the size of DNA  
421 fragments present (**Figure S71**).

422 We also Sanger sequenced the pre-cut PCR product from these three assays to determine if  
423 sequencing matched restriction digest results in a subset of 23 Papuan individuals; the results from the  
424 two assays matched. Sequencing these PCR products showed a variation in peak height at the SNV site  
425 based on the copy number of the duplication (CN3 showed half the peak height of the alternate allele  
426 compared to CN4; **Figure S71**). We tested a total of 242 additional Melanesian individuals for the  
427 presence of this Denisovan-introgressed duplication. These samples were extracted DNA obtained from  
428 the buffy coat from Melanesians across Papua New Guinea, mostly from New Britain, New Ireland, and  
429 Bougainville Islands (**Figure 2B; Table S11**), collected and housed by Dr. J. Friedlaender from the

430 Temple University as well as Drs. M. Brilliant and Dr. T. Carter at the Marshfield Clinic Research  
431 Institute.

432

433 Full-length non-chimeric (FLNC) transcripts for candidate regions using long-read cDNA sequencing

434 Total RNA was harvested from four human cell lines (GM10539, GM10541, GM10543, and GM12878)  
435 and one chimpanzee lymphoblast cell line and polyA RNA was purified by oligo-dT magnetic beads  
436 (Dyna: Thermo). Double-stranded cDNA with dual barcodes was prepared, amplified and subjected to  
437 hybridization capture in the manner detailed in (52). Hybridization probes were selected based on the  
438 genic candidate regions identified in Melanesian genomes. Probes were tiled along the exons of the  
439 following genes (Integrated DNA Technologies; IDT): *TNFRSF10A*, *TNFRSF10B*, *TNFRSF10C*,  
440 *TNFRSF10D*, *CHMP7*, *RHOBTB2*, and *NPIP5*.

441       Following post-capture PCR, the amplified dsDNA was purified on magnetic beads (AMPure PB;  
442 PacBio) and then subjected to library preparation for long-read sequencing (SMRTbell Template Prep Kit  
443 1.0; PacBio with barcoded SMRTbell adapters). SMRT sequencing was performed on the Sequel v2.1  
444 chemistry (PacBio) with LR SMRT Cells with 2-hour pre-extension and 20-hour movies. Reads  
445 corresponding to each sample were extracted by their SMRTbell barcodes and circular consensus  
446 sequences were generated from the raw subreads using SMRT Link with minimum number of pass set to  
447 1. The program *lima* in the *Iso-Seq3* pipeline (<https://github.com/PacificBiosciences/IsoSeq3>) was applied  
448 to remove the 5' and 3' dual barcodes and also obtain the unclustered FLNC reads. Parameters used were:  
449 `lima --isoseq --dump-clips`. We did not cluster the FLNC reads further because highly identical  
450 paralogous transcripts could undesirably cluster together in this step. Due to the variability of the yields of  
451 FLNC transcripts across samples and loci, we used data from various combinations of samples in  
452 subsequent analyses when applicable.

453       The resulting reads were mapped to the human reference (GRCh37) and/or other sequence  
454 contigs using minimap2 (v2.14-r883) with the option for long-read spliced alignment (-ax splice).  
455 Paralogs of the candidate genes were classified by identifying PSVs specific to the paralogs (52). In the  
456 case of identifying *NPIP* transcripts in the assembled Melanesian contig, we mapped all FLNC transcripts  
457 to two sets of reference sequences: (1) GRCh37 and the KV880768.1 contig (NCBI BioProject:  
458 PRJNA31257) and (2) the assembled Melanesian contig. We determined the best mapping location for  
459 each FLNC transcript by choosing the best mapping identity and focused on those with >99% identity in  
460 the alignment. In addition, we found that 14 fixed PSVs and two 13 bp indels can be used to identify  
461 *NPIP16*.

462

## 463 **Supplementary Text**

### 464 **Discovery of SNVs and CNVs**

465 The analyses in this study were primarily based on genomic data of SGDP samples and three archaic  
466 hominin genomes—a Denisovan (25) and a Neanderthal (26) from the Altai Mountains in Siberia, and a  
467 Neanderthal from Croatia (24). Paired-end Illumina data for 266 fully public SGDP samples were  
468 generated and aligned to human reference genome GRCh37, as previously described in Mallick et al.  
469 (27). To call SNVs and indel variants in the SGDP samples, we used the GATK HaplotypeCaller  
470 (**Methods**). Diploid genotypes of the three archaic genomes were downloaded from Prufer et al. (24) and  
471 combined with the SGDP genotypes by position. After a series of quality control (QC) filtering  
472 procedures, 23,103,829 fully called autosomal SNVs remained in the data (**Methods**).

473 To maximize sensitivity for identifying CNVs, we applied a suite of five different CNV callers to  
474 each of the SGDP genomes (**Methods**). After initial filtering (**Methods**), we discovered 368,256  
475 autosomal CNVs (**Table S3**). Of these CNVs, 93.5% were identified by a single CNV caller (**Figure S2**).  
476 To ensure the quality of CNV calls for downstream population genetic analyses, we focused on a  
477 conserved call set of 19,211 CNVs constructed by applying a variety of QC filters (**Methods**), including  
478 4,705 bi-allelic deletions (length: median= 6424, s.d.=31278.74), 4,727 bi-allelic duplications (length:  
479 median=6117, s.d.=161628.3), and 10,234 multi-allelic CNVs (length: median=4257, s.d.=70565.54)  
480 (**Figure S3**). Overall validation rates of >83.07% (>68.18% and ~100% for duplications and deletions,  
481 respectively) for these 19,211 CNVs were determined using an orthogonal single-nucleotide  
482 polymorphism microarray-based CNV detection approach (**Table S4; Methods**).

483

### 484 **Tests for positive selection and archaic introgression in Melanesians**

485 A population-stratified CNV could be a result of a beneficial CNV targeted by natural selection and/or an  
486 initially introgressed variant from a diverged hominin species, subsequently raised to a high frequency  
487 through demographic processes. To test these hypotheses, we performed a window-based scan using  $F_{ST}$   
488 (78),  $PBS$  (2), Tajima's  $D$  (79), nucleotide diversity ( $\pi$ ), and EHH (67) to search for signatures of positive  
489 selection, and computing the  $f_D$  (30) and  $S^*$  (49) statistics to detect introgressed archaic hominin  
490 sequences (**Methods**). Note that we only calculated  $S^*$  for candidates of introgressed loci identified by  $f_D$ ,  
491 if desired, as an orthogonal method to support the signals of archaic introgression.

492 To account for possible biases on the test statistics due to demographic processes, we performed  
493 large coalescent simulations based on 1,000 demographic models to construct the expected null  
494 distributions for the statistics (**Methods**). We used the site frequency spectrum-based demographic  
495 inference tool  $\partial a \partial i$  (50, 60) (**Methods**) to infer the prehistory of Melanesians. To reduce the dimensions  
496 of parameter searching space, we chose to build models for the population trio AFR-EA-MEL. Among a

497 variety of models that we tested (**Table S6**), we found that the best-fit model with asymmetric migrations  
498 between the two populations (**Figure S7**, log-likelihood = -103386) significantly fit the data better  
499 (adjusted-D = 5.707,  $p$ -value of likelihood ratio test = 0.0168) than a model with symmetric migrations  
500 between EA and MEL (**Figure S7**, log-likelihood = -104590). Our best-fit model suggests that the  
501 ancestors of Africans and non-Africans diverged ~74 thousand years ago (kya; 95% C.I.: 73,321–75,199),  
502 followed by the divergence between Melanesians and East Asians at ~52 kya (95% C.I.: 51,450–52,591),  
503 a compatible to a recent estimate of split time between aboriginal Australians/Papuans and Eurasians (19).  
504 In addition, the complexity of our best-fit model, such as the moderately high gene flow from East Asians  
505 to Melanesians (95% C.I. for  $N_{AMH} * m_{MEL-EA} = 1.109-1.128 > 1$ ; **Table S7**), highlights the importance of  
506 controlling biases due to demographic processes in downstream selection and introgression inferences in  
507 Melanesians.

508 In our coalescent simulations, we added parameters for branches prior to all the modern human  
509 branches, including those of archaic humans as well as the one leading to chimpanzee (**Figure S8**; **Table**  
510 **S8**). Parameter values associated with these additional branches were uniformly drawn from the  
511 confidence intervals published in literature to account for the uncertainties of those parameter estimates  
512 (**Table S8**). Our simulations also account for genomic heterogeneity in mutation and recombination rates  
513 (**Methods**). In general, our whole-genome coalescent simulations recapitulate the genetic variation  
514 patterns of SNVs observed in real data (**Figure S9A**), while the genomic distributions of test statistics  
515 (e.g.,  $F_{ST}$ ) are remarkably different between simulated and real data (**Figure S9B-C**), demonstrating the  
516 power of our inference to identify candidates of non-neutrally evolved loci. Unless stated otherwise, all  $p$ -  
517 values for the tests of selection and introgression scans are based on these parametric coalescent  
518 simulations.

519 We determined selective and introgressed signals for each of the highly stratified CNVs if they  
520 are flanked by significant windows ( $p$ -value < 0.05). Within Melanesians, we identified signatures of  
521 positive selection at 37 distinct CNV loci, and signals of introgression at 24 and 28 CNV loci using  
522 Neanderthal and Denisovan genomes as archaic references, respectively; interestingly, 19 were found  
523 using either reference (**Tables 1, S9-S10**). Notably, we found that stratified CNVs are significantly  
524 associated with candidate loci of positive selection ( $p$ -value = 0.032, a permutation test of 10,000 non-  
525 parametric simulations), but not with archaic introgression signals ( $p$ -value = 0.228) (**Figure S10**). The  
526 strong association between stratified CNVs and selection candidates is consistent with the predicted large  
527 effect sizes of CNVs, highlighting their important roles in adaptive evolution.

528



529 **Signals of the Melanesian–Denisovan-specific duplication on chromosome 16p12.2 consistent with**  
530 **positive selection and archaic introgression**

531 Among the most differentiated Melanesian CNVs, the top two loci (Bonferroni’s  $p$ -value of CNV  
532 stratification test  $< 2.5 \times 10^{-32}$ ) were previously reported by Sudmant et al. (2015) (9). First, at the locus of  
533 a 5 kbp duplication upstream of *METTL9* (chr16:21,596,722-21,601,720), we found significant signals for  
534 archaic introgression ( $p$ -value( $f_D$ )  $\leq 0.033$ ; **Tables S9-S10**), but not for selection ( $p$ -value = 0.127). At the  
535 second region, a 73.5 kbp duplication variant, spanning both *MIR548AA2* and *MIR548D2*, was found  
536 only in the Melanesian and Denisovan samples (DUP<sub>16p12</sub>, chr16:22,710,041-22,783,558; **Figure 2A**).  
537 Metaphase and interphase FISH experiments of three Melanesian cell lines (**Methods**) confirm the  
538 presence of DUP<sub>16p12</sub> (**Figures 2C, S38; Table S12**). We detected significantly elevated  $f_D$  scores using  
539 the Denisovan individual ( $p$ -value  $< 0.001$ ; **Figures S34, S36**), but not the Neanderthals ( $p$ -value = 0.178;  
540 **Figure S36**), as the archaic reference. This is consistent with a result of interbreeding events between  
541 Melanesians and Denisovan-like archaic humans (9, 21, 25). Note that although there were putative  
542 selection signals at the DUP<sub>16p12</sub> locus (**Figure S34**), we found elevated Tajima’s  $D$  values across this  
543 locus (**Figure S37**), consistent with a pattern of an excess of heterozygosity, which is likely driven by the  
544 collapse of PSVs. To assess the prevalence of this duplication variant, we designed a sequencing assay to  
545 genotype an independent set of 242 diverse Melanesians from eight different population groups  
546 (**Methods**). We confirmed this variant is present at high frequency across these Melanesian populations  
547 ( $>79\%$  samples; **Figure 2B; Table S11**). While DUP<sub>16p12</sub> is present at high frequency in all Melanesian  
548 groups, introgression is nearly complete among lowland populations of West and East New Britain.

549 By performing additional FISH experiments, we were able to map the extra copies within a  
550 duplication block at chr16:28.3-30.4 Mbp, most likely at 16p11.2 between 29.03 and 29.66 Mbp (i.e.,  
551 between the green and blue probes in **Figure S39**). In addition, we generated 75X coverage long-read  
552 sequence data targeting the 16p12.2 ancestral duplication locus from a Melanesian genome (**Methods**).  
553 To refine the putative integration site of the duplicate sequences, we constructed pseudo mate-pair reads  
554 by splitting long-read data extending over duplication junctions at 16p12.2, and then searched for read  
555 pairs linking 16p12.2 and 16p11.2 loci (**Methods; Figure S40**). Using this information, we further  
556 refined the integration locus to a 200 kbp interval (29.47 to 29.67 Mbp) mapping adjacent to an *NPIP*  
557 core duplicon and near *BOLA2* and *SMGIP2*. To sequence resolve the DUP<sub>16p12</sub> copy number  
558 polymorphism, we generated a Melanesian large-insert BAC library (GM10539). We constructed two  
559 haplotypes of 222 kbp and 133 kbp, partially confirming the structure of DUP<sub>16p12</sub> reported in (9)  
560 (**Figures S41-S42**) using five BAC contigs (NCBI BioProject: PRJNA522307). In order to fully assemble  
561 the entire locus *ab initio*, we used the haplotypes as the initial seeds to pull down long-read Melanesian  
562 whole-genome sequencing data and iteratively applied the SDA method (41) (**Figure S43; Table S14**).

563 We generated a ~1.8 Mbp sequence contig spanning more than 900 kbp of complex SDs (**Figure 3A**). To  
564 assess the quality of the *de novo* assembly of the contig, we aligned the sequences between the finished  
565 BAC haplotypes and the assembly, and confirmed the organization and sequence accuracy (99.86%)  
566 (**Figure S44**). We noted the observed sequence differences are likely due to the genome and the BAC  
567 library coming from two unrelated Melanesian samples. Notably, the sequence-resolved assembly shows  
568 that the actual length of DUP<sub>16p12</sub> duplication polymorphism is ~383 kbp, which is larger than previous  
569 thought (9).

570 To reconstruct the evolutionary history of the DUP<sub>16p12</sub> duplication polymorphism, we performed  
571 a series of phylogenetic analyses using BEAST (v2.5.0) (**Methods**) and a sample of loci across the  
572 duplication allele. Our inference results suggest that the variant originated from a series of complex  
573 structural changes involving duplication, deletion, and inversion events ~0.5–2.5 million years ago (Mya)  
574 within the Denisovan ancestral lineage, which subsequently inserted into chromosome 16p11.2  
575 (chr16:29,640,235-29,640,459) between 0.2–0.5 Mya (**Figures 3B, S45-S46; Table S15**). To examine if  
576 the sharing of this CNV between Melanesian and Denisovan genomes is a result of ILS or recent gene  
577 flow, we remapped the short-read Illumina data to the assembled Melanesian contig, along with GRCh37  
578 and KV880768.1, which is the contig of the ancestral locus of DUP<sub>16p12</sub>. We inferred a phylogeny using  
579 ~10 kbp sequences at the duplication polymorphism site, where enough high-quality Denisovan reads  
580 were present (>5 reads with MAPQ > 30), along with homologous sequences from GRCh37 and  
581 published nonhuman great ape assemblies (**Methods, Figure S48**). Our inference results show that all  
582 Denisovan and Melanesian sequences that carry the DUP<sub>16p12</sub> polymorphism forms a single clade and  
583 share TMRCA ~0.06–0.17 Mya. Importantly, the more recent ancestry of these duplication sequences  
584 than the Denisovan-modern human divergence (>400 kya) is consistent with the hypothesis of recent gene  
585 flow introducing this variant into populations ancestral to Melanesians.

586 Chromosome 16p11.2 is one of most complex regions in the human genome, where recurrent  
587 deletions and duplications, mediated by a complex set of SDs, have been known to associate with diseases  
588 (e.g., ~1% of cases of autism (40)) and implied their importance in human evolution (15). Interestingly,  
589 we observed both significantly elevated *PBS* (*p*-value < 0.012) and *f<sub>D</sub>* (*p*-value < 0.021, archaic ref =  
590 Denisovan) scores at the unique, diploid sequences flanking the 16p11.2 complex region (**Figure S47**).  
591 Consistent with the analyses for the DUP<sub>16p12</sub> locus above, the archaic introgression signals were  
592 completely diminished when Neanderthals were used as the archaic reference in the *f<sub>D</sub>* calculation (*p*-  
593 value > 0.193), suggesting the scenario of adaptive introgression from Denisovan-like archaic humans  
594 into Melanesians. We also note that the Melanesian duplication polymorphism harbors extra copies of SD  
595 sequences that are absent from most human populations, including an additional member of the *NP1P*  
596 family (42). To explore the *NP1P* coding potential at this locus, we used FLNC transcripts from two

597 Melanesian (GM10539 and GM10541) fibroblast cell lines (**Methods**). We identified FLNC transcripts  
598 that maintain the same ORF and encode a novel member of the *NPIP*B family, *NPIP*B16 (1,206 amino  
599 acids), mapping uniquely to the duplication polymorphism (**Figure 3C**). This Melanesian copy shows  
600 elevated pairwise *dN/dS* ratios when compared to other closely related *NPIP*B genes (RefSeq release 109)  
601 (**Figures S49-S50**). Using a phylogenetic branch site test (43), we identified 32 sites are likely positively  
602 selected, including a cluster of 28 sites locates at the last exon of *NPIP*B16 (**Figure 3C**). Sequence  
603 analysis shows that this cluster is likely due to two indel events of a repeat motif  
604 (GAGCGTCTGCGGG)—an indel upstream to the cluster caused frameshifting, while the other one  
605 downstream to the cluster restored the original frame of the peptide sequence—resulting in a local novel  
606 amino acid sequence at the last exon that is unique and only found in *NPIP*B16 (**Figure S51**), rather than  
607 a series of independent amino acid substitution events.

608

### 609 Archaic introgression of CNVs at chromosome 8p21.3 between Melanesians and Neanderthals

610 The most striking signals from our window-based selection (*PBS/F<sub>ST</sub>*) scan and archaic introgression test  
611 (*p*-value < 0.005) in the Melanesian samples center at chr8:22,969,611-23,045,069 (**Figures 4A-B, S52**).  
612 This region encompasses two significantly stratified CNVs in Melanesians (**Figure 4B**), a 6 kbp deletion  
613 (*DEL<sub>MEL-NDL</sub>*, chr8:22,982,302-22,988,251, Bonferroni's *p*-value <  $8.9 \times 10^{-11}$ ) and a 31 kbp duplication of  
614 *TNFRSF10D* (*DUP<sub>10D</sub>*, chr8:22,991,347-23,022,738; Bonferroni's *p*-value of *MWU* <  $1.5 \times 10^{-6}$ ) at the  
615 centromeric side of the deletion locus. Interestingly, the copy number estimates of *DEL<sub>MEL-NDL</sub>* and  
616 *DUP<sub>10D</sub>* are significantly and negatively correlated in Melanesian samples (Pearson's  $\rho = -0.64$ , *p* < 0.05),  
617 but not in other SGDP populations (**Figure S53**), showing a strong linkage between the two CNVs in  
618 Melanesians.

619 At the *DUP<sub>10D</sub>* locus, we observed an excess of heterozygosity and a pattern of allelic imbalance  
620 at this locus only in individuals from Melanesian (15 out of 16 samples), African (7 out of 33 samples),  
621 and the three archaic genomes (**Figures 4B, S53-S54**). Both patterns of excess of heterozygosity and  
622 allelic imbalance are consistent with the presence of PSVs due to the collapse of duplicate copies. With  
623 these lines of evidence, we determined that only individuals who show an excess of heterozygosity and  
624 allelic imbalance at this locus harbor the *DUP<sub>10D</sub>* duplication allele. The deletion allele of *DEL<sub>MEL-NDL</sub>*, on  
625 the other hand, was only observed in the Melanesian, the two Neanderthal, and the South Asian Punjabi  
626 genomes (allele counts = 14/32, 4/4, and 1/76, respectively). As an independent data set, we  
627 computationally genotyped 35 Papuans from Vernot et al. (23) and estimated a compatible frequency of  
628 0.457 for the deletion allele. To further validate the *DEL<sub>MEL-NDL</sub>* variant, we designed a PCR assay and  
629 tested 16 randomly selected DNA samples from blood-derived materials, as well as three Melanesian

630 fibroblast derived cell lines (**Methods**), and confirmed the presence of the deletion allele in eight out of  
631 the 16 blood-derived DNA samples (**Figure S56**) and one of the three cell lines (**Table S12**).

632 To assess the temporal and spatial frequency distributions for both  $DEL_{MEL-NDL}$  and  $DUP_{10D}$ , we  
633 used two additional large data sets from the Great Ape Project (GAP) (28) and the 1000 Genomes Project  
634 (1KG, Phase 3). Among the GAP genomes, while the absence of the  $DEL_{MEL-NDL}$  indicates that this  
635 deletion variant is likely derived, we found evidence for the presence of the  $DUP_{10D}$  variant in all of the  
636 GAP genomes (**Figures S53, S55C**), suggesting that the duplication allele is ancestral to great apes. The  
637  $DUP_{10D}$  variant segregates at low frequencies across the 1KG populations ( $<0.025$ ) but is completely  
638 absent in the European populations (**Figure S57**). On the other hand, 64 out of the 2,504 samples from all  
639 five continents show a reduced level of sequence coverage at the  $DEL_{MEL-NDL}$  locus (CN estimates  $< 1.5$ ;  
640 **Figure S57; Table S17**). We performed two orthogonal approaches to examine the presence or absence  
641 of the deletion variant in other populations. First, we identified seven tag SNVs that are in nearly  
642 complete linkage with the  $DEL_{MEL-NDL}$  variant in the SGDP samples ( $r^2 > 0.9$  and  $D' > 0.9$ ; **Table S18**)  
643 and used them as surrogates to understand the geographic allele frequency distributions of the deletion  
644 variant in the 1KG samples. In all seven cases, the deletion tag alleles were only found in South Asian  
645 populations, but at low frequencies ( $<0.07$ ; **Figures 5A, S66**). In a low-coverage Neanderthal genome,  
646 Mezmaiskaya1 (24), the deletion tag alleles are fixed in all three of seven sites where it has sequence  
647 coverage, suggesting that Mezmaiskaya1 is homozygous for the deletion variant (**Table S18**). Similarly,  
648 our PCR experiment results also confirm that  $DEL_{MEL-NDL}$  is geographically restricted to the South Asian  
649 populations at low frequencies ( $<0.068$ ; **Table S17**).

650 The observation of  $DEL_{MEL-NDL}$  in both Neanderthals and non-African populations as well as the  
651 significant archaic introgression signal ( $p$ -value of  $f_D = 0.003$ ,  $p$ -value of  $S^* = 0.043$ ; **Figure S67**) suggest  
652 that the sharing is likely a result of archaic introgression. We noted that the introgression signal around  
653  $DEL_{MEL-NDL}$  became insignificant when we used the Denisovan genome as the archaic reference in the  $f_D$   
654 analysis ( $p$ -value=0.06; **Figure S68**). To further investigate this hypothesis, we analyzed genetic variation  
655 patterns of the unique sequence of 18,500 bp at the telomeric side of *TNFRSF10D* that spans the locus of  
656  $DEL_{MEL-NDL}$  (chr8:22,972,880-22,991,380). Phasing 56 SNVs in this region, along with the two bi-allelic  
657 CNVs for all SGDP samples, we found that the 15  $DEL_{MEL-NDL}$  linked haplotypes in SGDP samples are  
658 more closely related to the Neanderthal haplotypes than any other samples (**Figure S69**). Interestingly, all  
659 14 Melanesian  $DEL_{MEL-NDL}$  haplotypes are almost identical and equally distant to the four Neanderthal  
660 haplotypes.

661 Both the maximum likelihood estimated phylogenetic tree (log likelihood = -21578; **Figure**  
662 **S70A**) and haplotype network (**Figure 5B**) analyses show that all  $DEL_{MEL-NDL}$  haplotypes form a  
663 monophyletic clade, suggesting a common ancestry of these haplotypes. We estimated that the time to

664 TMRCA for all modern and archaic sample haplotypes is 601 kya (95% C.I.: 430–853 kya) and is  
665 consistent with the divergence between modern humans and Neanderthal/Denisovan (24, 26). We  
666 estimated that TMRCA of the Neanderthal and Melanesian DEL<sub>MEL-NDL</sub> haplotypes is 40 kya (95% C.I.:  
667 0–122 kya) and that of all 19 DEL<sub>MEL-NDL</sub> haplotypes in SGDP is 120 kya (95% C.I.: 0–241 kya). The  
668 much younger TMRCA of these DEL<sub>MEL-NDL</sub> haplotypes than the Neanderthal-modern human divergence  
669 provides evidence for that the sharing of the DEL<sub>MEL-NDL</sub>-linked haplotypes between the two species was a  
670 result of recent gene flow, as opposed to ILS. Moreover, under a model of ILS and reasonable  
671 demographic parameters we estimated that the probability of sharing a sequence of 18.5 kbp between  
672 modern humans and Neanderthals is highly unlikely ( $p$ -value  $\leq 0.04$ ; **Methods**). Finally, we hypothesized  
673 that the observed high frequency and homogeneity of the deletion haplotype in Melanesians is likely due  
674 to ongoing positive selection. Using the deletion variant as a surrogate for the haplotype, we performed a  
675 test that controls demography by comparing the observed *PBS* value of the deletion allele with a  
676 parametric *PBS* distribution, generated using SNVs from our coalescent simulations. To control the age of  
677 the variant, we required the derived allele frequency of simulated SNVs be within 30% of the frequency  
678 of the DEL<sub>MEL-NDL</sub> deletion allele among the simulated Melanesian chromosomes (i.e., 0.306–0.568;  
679 7,850 SNVs for MEL). Compared with the parametric distribution of *PBS*, the observed *PBS* value of the  
680 DEL<sub>MEL-NDL</sub> deletion allele is significantly high ( $PBS=0.933$ ,  $p$ -value=0.0082; **Figure 5C**). Together, our  
681 results are consistent with patterns expected under genetic introgression of DEL<sub>MEL-NDL</sub> haplotypes  
682 between the ancestors of non-Africans and Neanderthals and suggest that the unusually high frequency of  
683 this introgressed haplotype in Melanesians is likely a result of ongoing positive selection.

684 To understand the evolution of *TNFRSF10D* in primates, we generated high-quality sequences  
685 using BAC libraries of three nonhuman great ape lineages, including chimpanzee, gorilla, and orangutan,  
686 as well as an Old World rhesus macaque monkey (**Methods**). Sequence comparisons between human  
687 reference (GRCh37) and nonhuman primate BAC sequences revealed the same tandem organization of  
688 the duplication *TNFRSF10D1* of 30,394 bp and *TNFRSF10D2* of 33,022 bp in all nonhuman primate  
689 samples, which is not represented in the human reference (**Figures 4C, S60**). Because of the absence of  
690 duplication signals in most of modern human samples, these observations suggest that the haplotype of a  
691 single *TNFRSF10D* copy found in most humans is the derived form. We also tested the tandem  
692 organization of the duplications in Melanesians using interphase FISH experiments for three fibroblast  
693 cell lines. Indeed, our results showed that the tandem duplications are present in all two of the three cell  
694 lines (**Table S12**).

695 We inferred the breakpoints of the duplication using two complementary approaches. First, we  
696 mapped the reads of the SGDP samples to a high-quality chimpanzee assembly (53) and performed read-  
697 depth profiling for each sample across the DUP<sub>10D</sub> region in chimpanzee. We identified a clear depletion

698 of read coverage in CN2 SGP samples within the tandem duplication locus, of which about two-thirds  
699 of *TNFRSF10D1* (~18,400 bp, 000025F\_1\_22350596\_quiver\_pilon:20,763,000-20,781,405) and one-  
700 third of *TNFRSF10D2* (~11,900 bp, 000025F\_1\_22350596\_quiver\_pilon:20,751,031-20,762,948)  
701 sequences were seemingly deleted (**Figure S60**). As the second approach, we created a multiple sequence  
702 alignment using the homologous sequences of *TNFRSF10D* from the human reference and a chimpanzee  
703 BAC assembly (**Methods**). We found the most likely breakpoint at a region of 82 bp (chr8:23,003,123-  
704 23,003,255, GRCh37), partially overlapping the 5<sup>th</sup> intron and exon of *TNFRSF10D* in GRCh37, using a  
705 hidden Markov model (**Methods**). The top two best matches of the 82 bp sequences on the chimpanzee  
706 sequences were mapped to the two ends where the drop of read depth occurs (**Figure S59**).

707 We performed Bayesian phylogenetic analyses using the homologous sequences of the human  
708 reference (GRCh37) *TNFRSF10D1* and *TNFRSF10D2*, separately, from four primate lineages (**Figure**  
709 **S60; Methods**). We noticed an increase in high sequence identity between most of the rear portion of the  
710 DUP<sub>10D</sub> sequences in orangutan (**Figure S60B**), a pattern consistent with interlocus gene conversion,  
711 which may obscure the true phylogenetic signals. Manually removing this and other low-quality  
712 alignment regions resulted in alignments of 3,934 and 4,215 bp for *TNFRSF10D1* and *TNFRSF10D2*,  
713 respectively. We performed two phylogenetic inferences, of which the human *TNFRSF10D1* and  
714 *TNFRSF10D2* sequences were used separately due to the lack of homology between the two sequences.  
715 The two phylogenies that we inferred are largely consistent to each other (**Figure S60**) and show at least  
716 two independent duplication events of *TNFRSF10D* in the evolution of primates: one in the lineage  
717 leading to the Old World rhesus macaque monkey and the other at 27.55 Mya (95% highest posterior  
718 density: 19.88–36.14), about the divergence between Old World monkeys and apes at 25–30 Mya. We  
719 noted a gene tree–species tree discordance among human, chimpanzee, and gorilla on the phylogeny  
720 using the human *TNFRSF10D2* data, likely due to ILS.

721 We determined gene expression and annotation for different copies of *TNFRSF10D* using full-  
722 length transcripts from Melanesian (GM10541, CN3), European (GM12878, CN2), and chimpanzee  
723 (PanTro, CN4) fibroblast cell line samples (29) (**Methods**). Complete transcripts, originated from full-  
724 length cDNA molecules, were generated following a framework based on long-read PacBio sequencing  
725 technology and mapped to the human reference assembly (ENST00000312584) (52) (**Methods**). Because  
726 the human reference *TNFRSF10D* is a product of gene fusion between *TNFRSF10D1* and *TNFRSF10D2*,  
727 to classify transcripts we leveraged the patterns of single-nucleotide mismatches in individual transcript  
728 alignments against the human reference copy. In the chimpanzee sample, our analyses reveal two types of  
729 transcripts corresponding to six and nine exons in *TNFRSF10D1* and *TNFRSF10D2*, respectively  
730 (**Figures S61-S62**). In addition, the Melanesian CN3 sample carries all three types of transcripts, while  
731 the European CN2 sample only possesses the fusion hybrid gene copy as expected (**Figure S61**).

732 Interestingly, while all *TNFRSF10D1* transcripts we examined carry a premature stop codon in exon 2,  
733 which truncates the protein after 59 amino acids, a 217 amino acid protein is likely translated in a  
734 different frame using a second start codon, upstream to the premature stop codon in exon 2 (**Figure S62**).  
735 In contrast, *TNFRSF10D2* transcripts maintain an ORF with all nine exons consistent with the annotation  
736 in the human reference assembly. Note that the common human fusion hybrid gene effectively deletes the  
737 *TNFRSF10D1* premature stop codon (**Figure S62**), thus restoring the ORF. To assess if positive selection  
738 has acted on protein-coding sequences across any of these *TNFRSF10D* lineages, we computed *dN/dS*  
739 ratios for the ORF sequences of the six common transcripts from the three cell line samples and two  
740 pseudo-transcripts extracted from rhesus macaque BAC sequences (**Methods**). Pairwise *dN/dS*  
741 comparisons among these protein-coding sequences indicate significant large *dN/dS* ratios for the  
742 *TNFRSF10D1* lineages, suggesting an excess of nonsynonymous changes observed within these lineages  
743 (**Figure S63**). We used a phylogenetic branch model of positive selection (43) and found that the inferred  
744 *dN/dS* ratios are significantly greater than 1 at the clade of *TNFRSF10D1* lineages ( $p = 0.017$ ; **Figures**  
745 **S64-S65**), but not at any other clades, suggesting adaptive protein evolution acting on the clade of  
746 *TNFRSF10D1* lineages. In addition, using a branch-site test (43), we find evidence of positive selection  
747 for both the fusion gene and the *TNFRSF10D1* copy on the human lineage and more broadly for both *D1*  
748 and *D2* in other nonhuman apes ( $p = 0.005$ ; **Figures 4D, S64**). Specifically, we identify a cluster of  
749 positively selected sites corresponding to the predicted transmembrane domain of the genes (**Figures 4D,**  
750 **S64**).

751

#### 752 **Supporting evidence for selection signals at known CNV loci in Melanesians**

753 Here we provided a detailed discussion for four of the Melanesian candidate CNV loci that are in close  
754 proximity to known selected copy number variable regions in other populations. The deletion variant at  
755 the *APOBEC3* gene cluster (**Figure S15**) is commonly found among human populations (frequency of  
756 22.5%), especially in Oceanian populations (92.9%) (32). Because the putative deletion boundaries that  
757 we inferred (chr22:39,388,950-39,483,917) overlap with SDs, which confound copy numbers estimated  
758 using read-depth-based whole-genome shotgun sequencing detection (WSSD), we utilized a SUNK  
759 genotyping method to infer paralog-specific copy number (54). Consistent with the previous studies, we  
760 estimated that 24.5% of the SGDP haplotypes (122 out of 498 haplotypes) carry this variant (**Figure**  
761 **S15**). While the deletion allele is highly variable in frequency among the SGDP samples and observed in  
762 nonhuman great apes, it is fixed only in the Melanesian samples (**Figure S16, left panel**). Here we  
763 provided evidence for significant signals of positive selection (parametric  $p$ -value of the *PBS* test  $< 0.017$ ,  
764 blue dots in **Figure S17**) at the unique (CN = 2) sequences of the flanking regions around the deletion  
765 variant (chr22:39,340,000-39,450,000), although we did not observe any highly differentiate SNVs that

766 are potentially functional in Melanesians. To investigate the haplotype pattern around this candidate  
767 locus, we phased 266 SNVs along with the deletion variants from the flanking sequences in Melanesians  
768 and other populations (**Figure S17**). Haplotypes were further grouped using nine SNVs with  $PBS > 0.5$   
769 and classified into haplogroups according to the pairwise mutation distances and the deletion status  
770 (**Methods**). The deletion-linked haplogroup is nearly absent in sub-Saharan Africans and found mostly in  
771 low (4%, EUR) to intermediate (40%, AMR) frequencies in other non-Africans, suggesting a recent  
772 origin of this haplotype (**Figures S17-S19**). Strikingly, we found that Melanesians carry a single deletion-  
773 linked haplogroup with extended homozygosity (**Figures S17, S19**), in accordance with the hypothesis of  
774 selective sweep.

775         The highly stratified multi-allelic CNV at the alpha-defensin (*DEFA*) gene family  
776 (chr8:6,839,960-6,878,169; **Figure S20**) locates at the telomeric side of the chromosome 8p23.1 region,  
777 one of the most structurally dynamic regions in the human genome, where recurrent rearrangements,  
778 including microdeletions, interchromosomal transpositions, and inversions, have occurred over primate  
779 evolution and have been associated with disease (36, 80). Our selection candidate of CNV overlaps with a  
780 known SD pair, each encompassing the *DEFA1-T1* subfamily (CNP<sub>DEFA1-T1</sub>), and thus CNP<sub>DEFA1-T1</sub> has a  
781 diploid copy number four in the human reference genome (**Figure S20**). There is a great variability in  
782 copy number from 3 to 18 copies for CNP<sub>DEFA1-T1</sub> across SGDP and nonhuman primate samples (**Figures**  
783 **S20-S21**). Interestingly, we observed Melanesians are less variable in copy number, and 87.5% of the  
784 samples carry more than eight copies of CNP<sub>DEFA1-T1</sub> (**Figures S20-S21**). Applying both metaphase and  
785 interphase FISH experiments to three Melanesian cell lines (**Methods**), we determined all the three  
786 samples have the direct orientation of 8p23.1 and the tandem organization of CNP<sub>DEFA1-T1</sub> duplications  
787 (**Figure S22**). Our selection test using the *PBS* statistic provided evidence for positive selection at the  
788 sequences flanking the SD region ( $p$ -value  $< 0.035$ , chr8:6,819,244-6,921,178; **Figure S23**). Haplotype  
789 analysis using 855 SNVs from the selection candidate region reveals that most Melanesian samples carry  
790 Haplogroup2 haplotypes (94%; **Figures S24-S25**), which are completely absent from sub-Saharan  
791 African samples and observed at low (7%, SIB) to intermediate (23%, ME) frequencies in the rest of non-  
792 African populations. The high frequency Haplogroup2 haplotypes in Melanesians also show a slow decay  
793 of homozygosity, a pattern expected under positive selection acting at this locus (**Figures S23, S25**).

794         Another selective CNV candidate we identified in Melanesians is at the chromosome 17q21.31  
795 locus (chr17:44,170,850-45,157,111; **Figure S26**), one of the most dynamic and complex regions in the  
796 human genome. Previous studies reported both direct and inverted haplotypes and three large copy  
797 number polymorphic duplications (CNP155, CNP205, and CNP210; **Figure S26**) at this locus and  
798 showed associations of inverted form with the 17q21.31 microdeletion syndrome (37, 38). Analyses of  
799 pairwise WSSD-based copy number estimates showed that all human populations are highly variable in



800 the copy number configuration for the three large SDs, except the Melanesians, of which 94% of the  
801 samples have diploid copy number two for all three variants (**Figure S26**). To further investigate the copy  
802 number configuration of these CNVs, we applied the SUNK-based genotyping (**Methods**) to all SGDP  
803 samples and nonhuman great apes. We found that the observed high copies of CNP210 variants are likely  
804 a result of duplication events for CNP210-dup1, not CNP210-dup2 (**Figures S26-S27**). Furthermore, our  
805 analysis suggests that 97% of Melanesian haplotypes carry a single copy for both CNP210-dup2 and  
806 CNP155/CNP205, but no CNP210-dup1 sequences (**Figures S26-S27**). The frequencies of this haplotype  
807 vary from 11.7% (EUR) to 36.3% (SIB) across SGDP populations as well as archaic and nonhuman great  
808 ape samples (**Figure S27**). Using FISH experiments, we confirmed that all three Melanesian cell lines  
809 carry the direct haplotype, with GM10541 and GM10543 carrying only one copy of CNP210 on both  
810 chromosomes (homozygous H1.1/ H1.1; nomenclature follows Steinberg et al. 2012 (37)) and GM10539  
811 carrying one copy of the CNP210 duplication on one chromosome and two copies on the other  
812 chromosome (heterozygous H1.1/H1.2) (**Figure S28**). We detected signals of positive selection at the  
813 flanking sequences of the distal side of CNP210-dup2 region (*PBS*  $p$ -value  $< 0.02$ , chr17:44,784,657-  
814 44,854,722; **Figure S29**). Haplotype analysis using 367 SNVs from this region showed that one of the  
815 common haplogroups, Haplogroup2, while is common in most non-Africans, particularly in ME (70%),  
816 EUR (75%), and SA (80%), is almost fixed in Melanesians (97%) (**Figure S30**). In addition, we also  
817 observed significantly negative Tajima's  $D$  ( $< -2.14$ ,  $p$ -value = 0.007), low nucleotide diversity ( $\pi < 4.3 \times$   
818  $10^{-5}$ ,  $p$ -value = 0.042), and EHH across this region, patterns as expected under positive selection (**Figures**  
819 **S31-S32**). Together, these lines of evidence suggest selection acting on the high frequency Haplogroup2  
820 in Melanesians.

821 One of the most significant signals for selection in Melanesians locates at chromosome 14q24 ( $p$ -  
822 value for the *PBS* test  $< 0.001$ ), expanding ~510 kbp sequences (chr14:73,730,000-74,240,000, **Figure**  
823 **S11**). At this region, a CNV, CNP<sub>ACOT1-2</sub> (chr14:73,999,126-74,053,245), is highly differentiated in copy  
824 number between Melanesians and the rest of SGDP populations (Bonferroni's  $p$ -value for the CN  
825 stratification test = 0.027). Because CNP<sub>ACOT1-2</sub> spans over the SDs encompassing *ACOT1* and *ACOT2*,  
826 we applied the SUNK genotyping method to infer paralog-specific copy numbers underlying the *ACOT1*  
827 and *ACOT2* sequences. In short, SUNK genotyping leverages the presences of fixed sequence differences  
828 that uniquely found in each paralog and thus can infer a more accurate copy number for each paralog  
829 (**Methods**). The SUNK copy number heat maps for the SGDP samples revealed that the stratification  
830 signal at CNP<sub>ACOT1-2</sub> is primarily driven by the copy number variation at the *ACOT1* locus  
831 (chr14:73,999,126-74,018,293, Pearson's correlation  $\rho = 0.938$ ,  $p$ -value  $< 2.2 \times 10^{-16}$ , **Figure S12**), not  
832 the *ACOT2* locus (chr14:74,024,364-74,053,245, Pearson's correlation  $\rho = -0.0005$ ,  $p$ -value = 0.9931).  
833 We estimated that the frequency of the presence of at least one copy of *ACOT1* (SUNK CN  $> 0$ ) is the

834 highest in Melanesians (100%) compared with those of the rest of SGDP populations (27–75% samples).  
835 In addition, the fraction of Melanesian samples carrying at least two copies of *ACOT1* is 87.5%, a much  
836 higher rate than other SGDP populations (9–40%), which is consistent with the expectation of positive  
837 selection acting on the *ACOT1* locus in Melanesians (**Figure S12**).

838 To further investigate the hypothesis of positive selection acting on *ACOT1* in Melanesians, we  
839 phased the 1,460 SNVs spanning the 510 kbp region and constructed haplotypes for all SGDP samples.  
840 We noted that among the four major haplogroups, Haplogroup2 is in high frequency among Melanesians  
841 (72%), but in much lower presence in other populations (0–11%), while Haplogroup1 is the most  
842 common in other populations, including the three archaic samples (**Figure S13**). Furthermore, under  
843 positive selection, the haplotype that carries the beneficial variant is expected to show EHH (67). We  
844 examined the pattern of haplotype homozygosity in Melanesians using two of the top *PBS* SNVs  
845 (rs4903119, *PBS*=2.29; rs8015976, *PBS*=2.17, **Figure S11C**) as the core SNVs. At the two sites, 84% of  
846 the Melanesian samples carry the T-G haplotype (T allele at rs4903119, ancestral, frequency=0.92; G  
847 allele at 8015976, derived, frequency=0.84). **Figure S11C** shows that the T-G haplotype clearly retains  
848 long and high levels of EHH, centered at the  $CNP_{ACOT1-2}$  locus. We noted that although a similar EHH  
849 pattern was observed in some of the non-African SGDP populations, most of individuals in those  
850 populations in fact carry a different allele at the core (**Figure S14**). We noticed that there are also  
851 significant signals of archaic introgression around the  $CNP_{ACOT1-2}$  locus in Melanesians regardless the  
852 archaic reference sequence ( $p$ -value of  $f_D < 0.023$ , **Figure S11A**). Because the haplotypes of the three  
853 archaic genomes belong to Haplogroup1, the selection signal is unlikely confounded by the introgression  
854 signal.

855

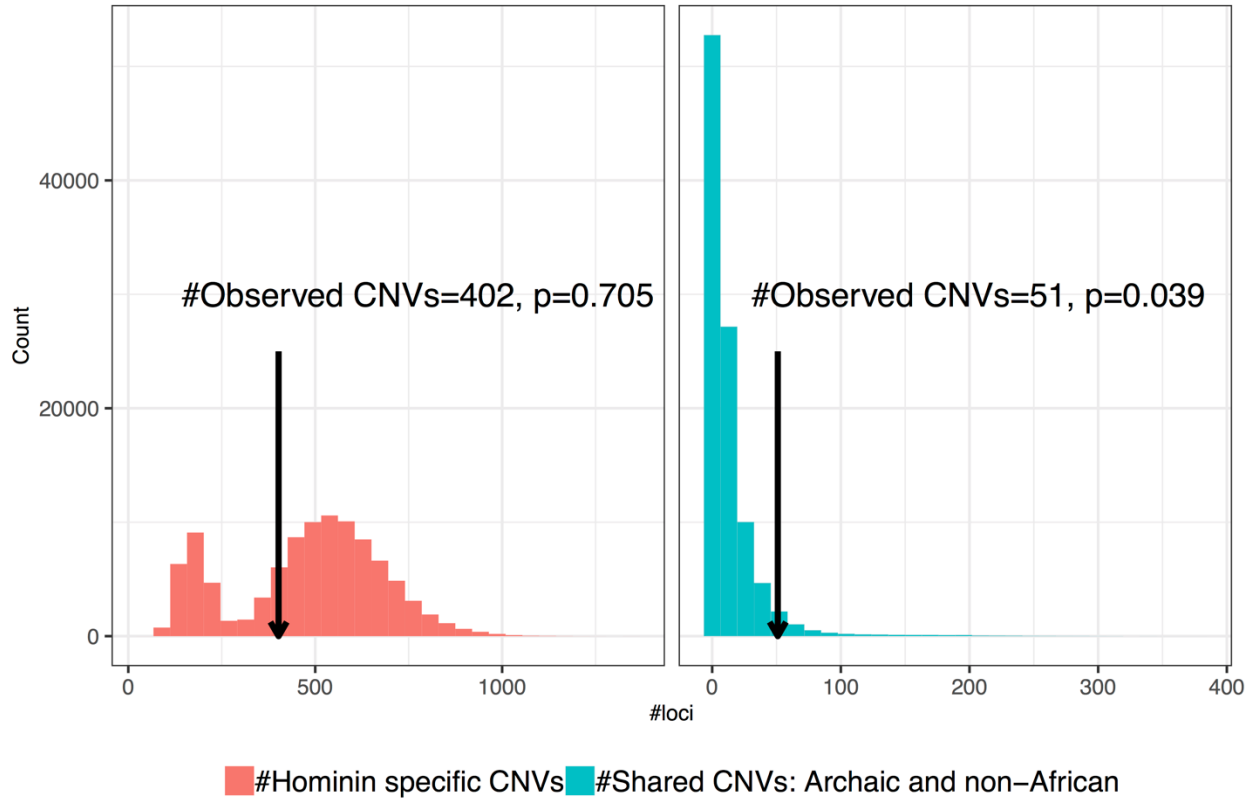

856

857 **Figure S1. Significantly shared CNVs between archaic Eurasian hominins and non-Africans.** Based  
 858 on a database of 5,135 CNVs identified using a read-depth approach (54) and genotyped in the SGDP  
 859 samples ( $n=224$ ) (27), nonhuman great apes ( $n=72$ ) (28), and archaic Eurasian hominins ( $n=3$ ) (24-26).  
 860 Lineage-specific or shared events are defined based on a comparison among species and/or populations as  
 861 described in the Methods section. The  $p$ -values were based on 100,000 permutation simulations shuffling  
 862 the labels of samples.

863

864

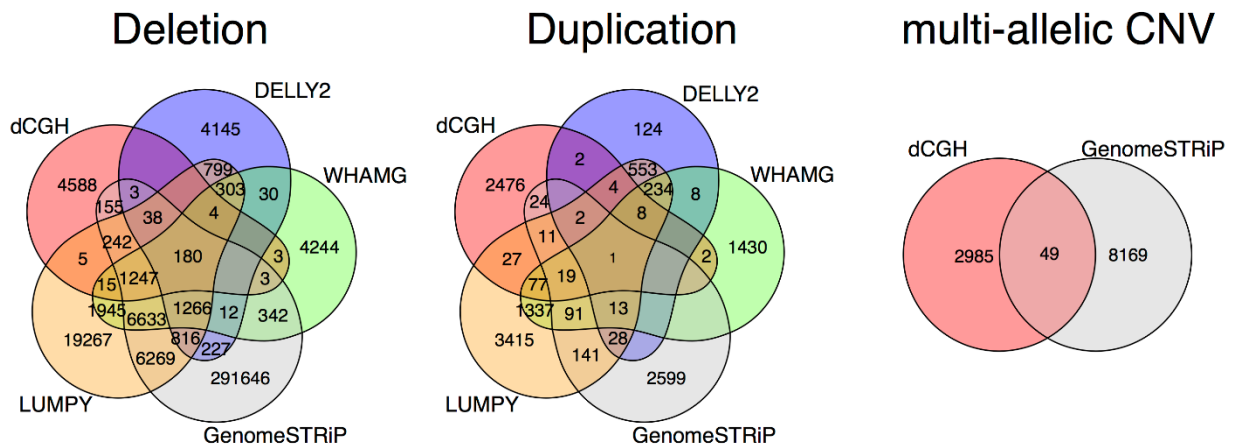

865

866

867 **Figure S2. Venn diagrams of the 368,256 CNVs identified in SGDP samples using five callers.** Note  
 868 that only dCGH and Genome STRiP identify multi-allelic CNVs.

869

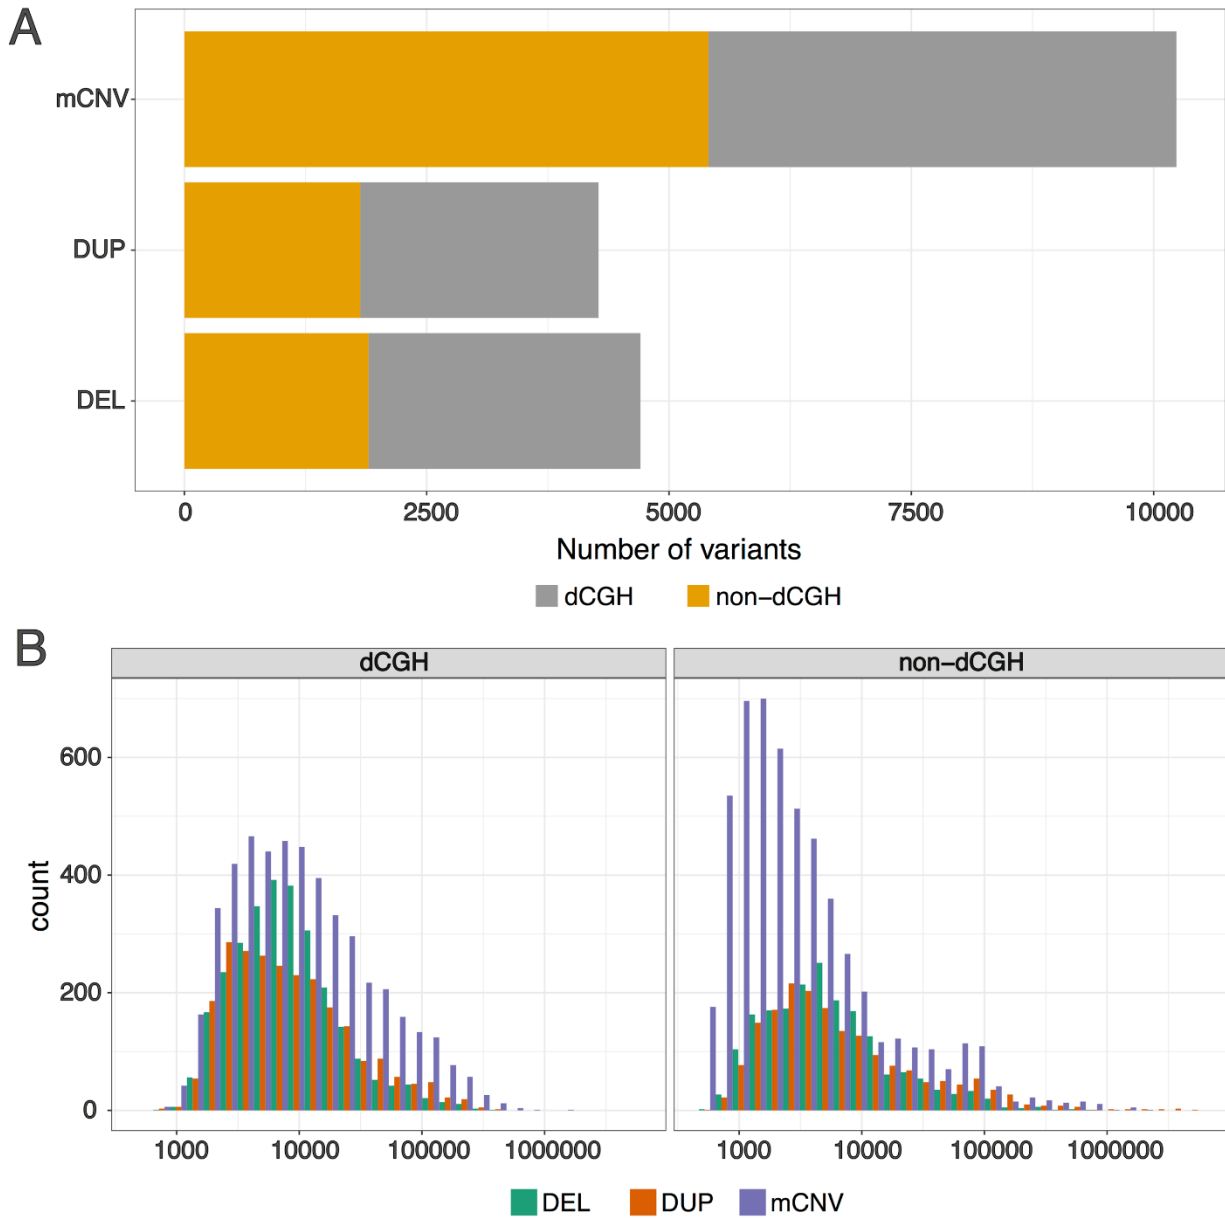

870  
 871 **Figure S3. Distributions of 19,211 post-filtered CNVs in type and length.** (A) The frequencies of  
 872 dCGH and non-dCGH called variants, plotted in different CNV categories: mCNV: multi-allelic CNV,  
 873 DUP: bi-allelic duplication, and DEL: bi-allelic deletion. (B) The length distributions of dCGH and non-  
 874 dCGH called CNVs.  
 875

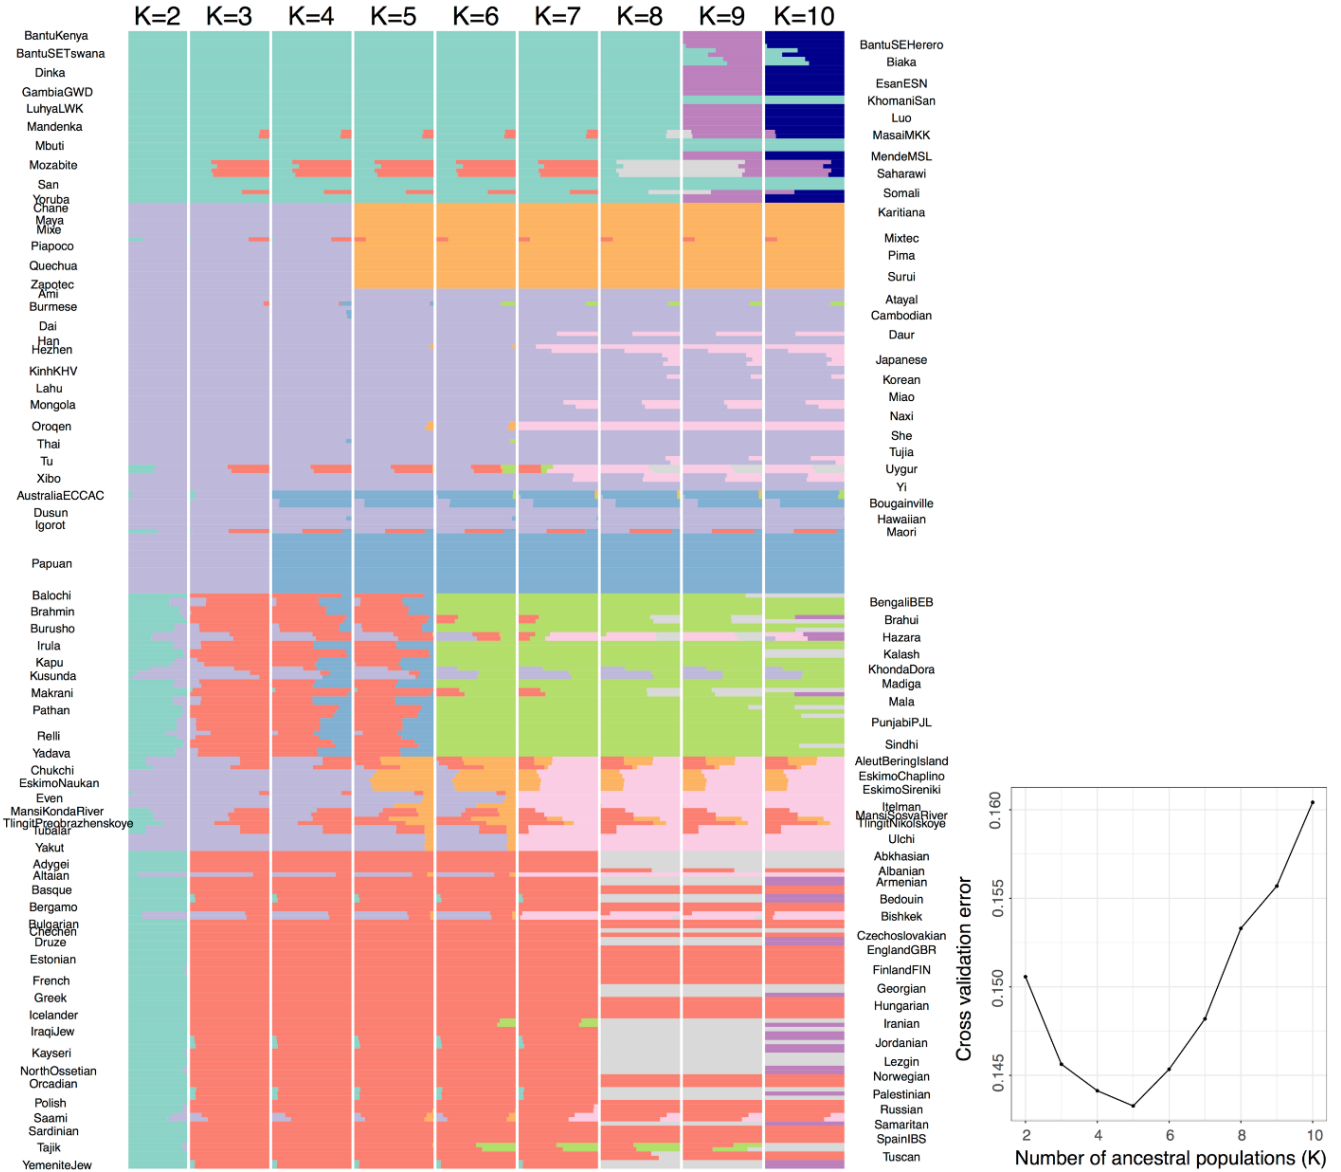

876  
877

878 **Figure S4. ADMIXTURE analysis.** We applied ADMIXTURE to the SGDP samples using the number  
879 of putative ancestral populations, K, between 2 and 10. To ensure the convergence of the estimation, we  
880 performed 20 replicates for each K. Using the default fivefold cross-validation, we inferred the best K = 5  
881 (CV error = 0.14327), corresponding to major populations: sub-Saharan Africans, Native Americans, East  
882 Asians, Sahul Oceanians, and West Eurasians.  
883

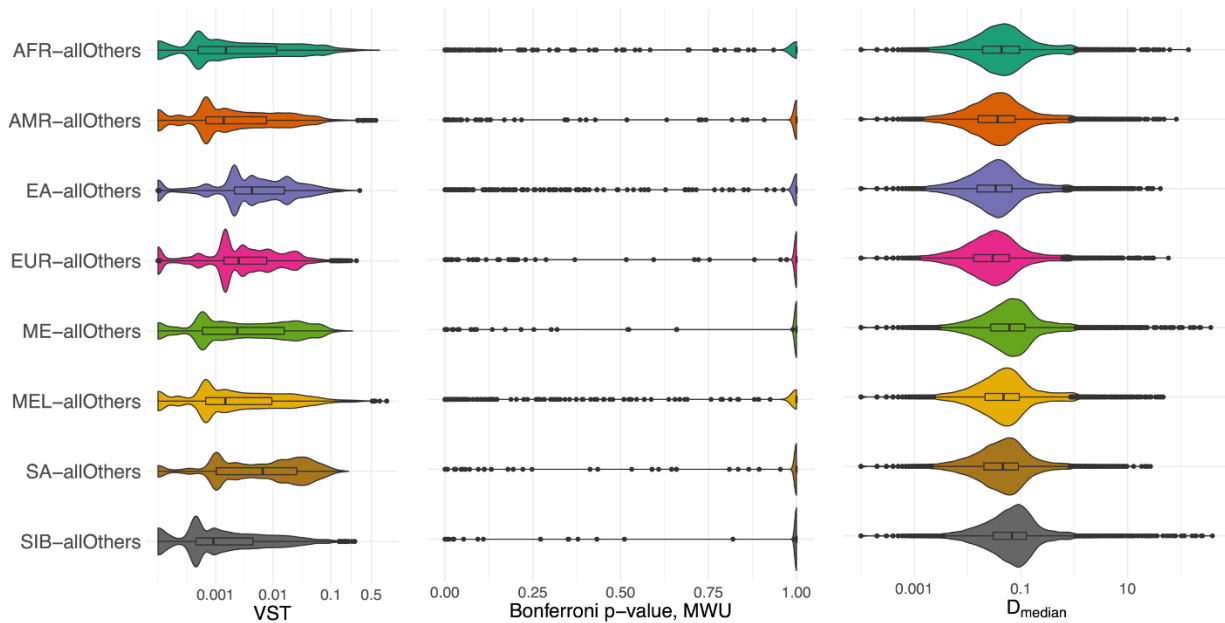

884  
885  
886  
887  
888  
889  
890  
891

**Figure S5. Distributions of statistics for identifying population-stratified CNVs.** Statistics are calculated as described in Materials and Methods to compare focal populations X and all of the rest SGDP samples, where  $X = \{AFR, AMR, EA, EUR, ME, MEL, SA, SIB\}$ .

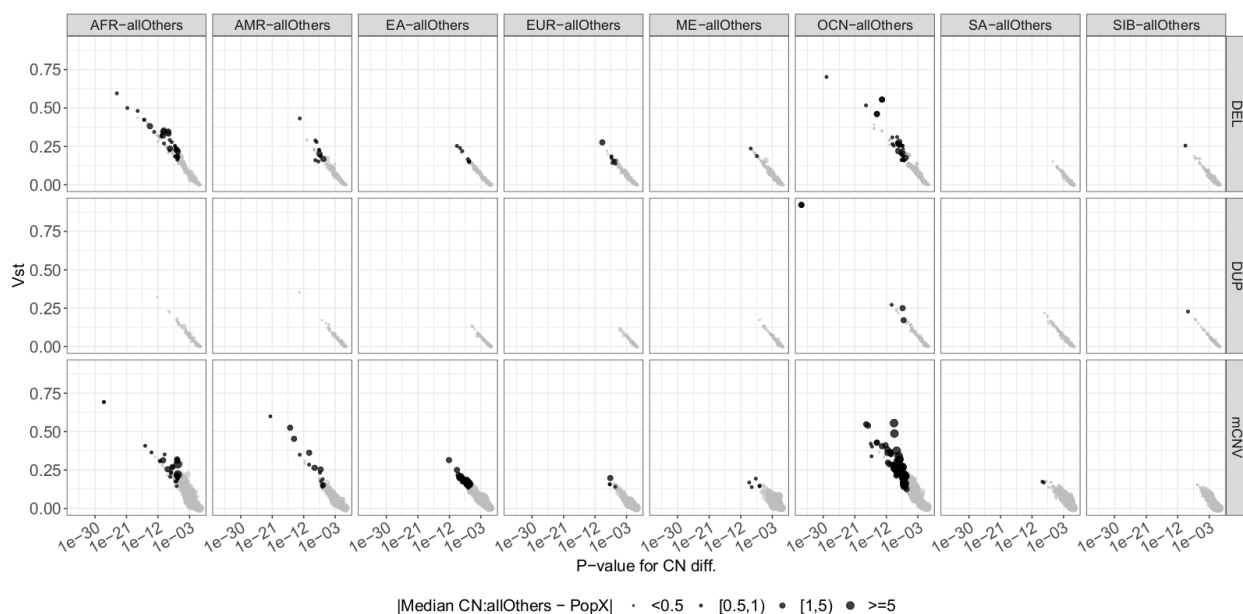

892  
893  
894  
895  
896  
897  
898  
899

**Figure S6. Joint distribution of test statistics for identifying population-stratified CNVs.** Panels of each column show the three tests of copy number (CN) stratification for a focal population vs. the rest of the SGDP samples, while rows are the results for three different CN categories. Each dot is a CNV, whose size is determined by the  $D_{median}$  statistic. Significantly stratified CNVs, defined as (i)  $V_{ST} > 0.1$ , (ii) Bonferroni  $p$ -value of the CN differentiation ( $MWU$ ) test  $< 0.05$ , and (iii)  $D_{median} > 0.5$ , are colored in black.

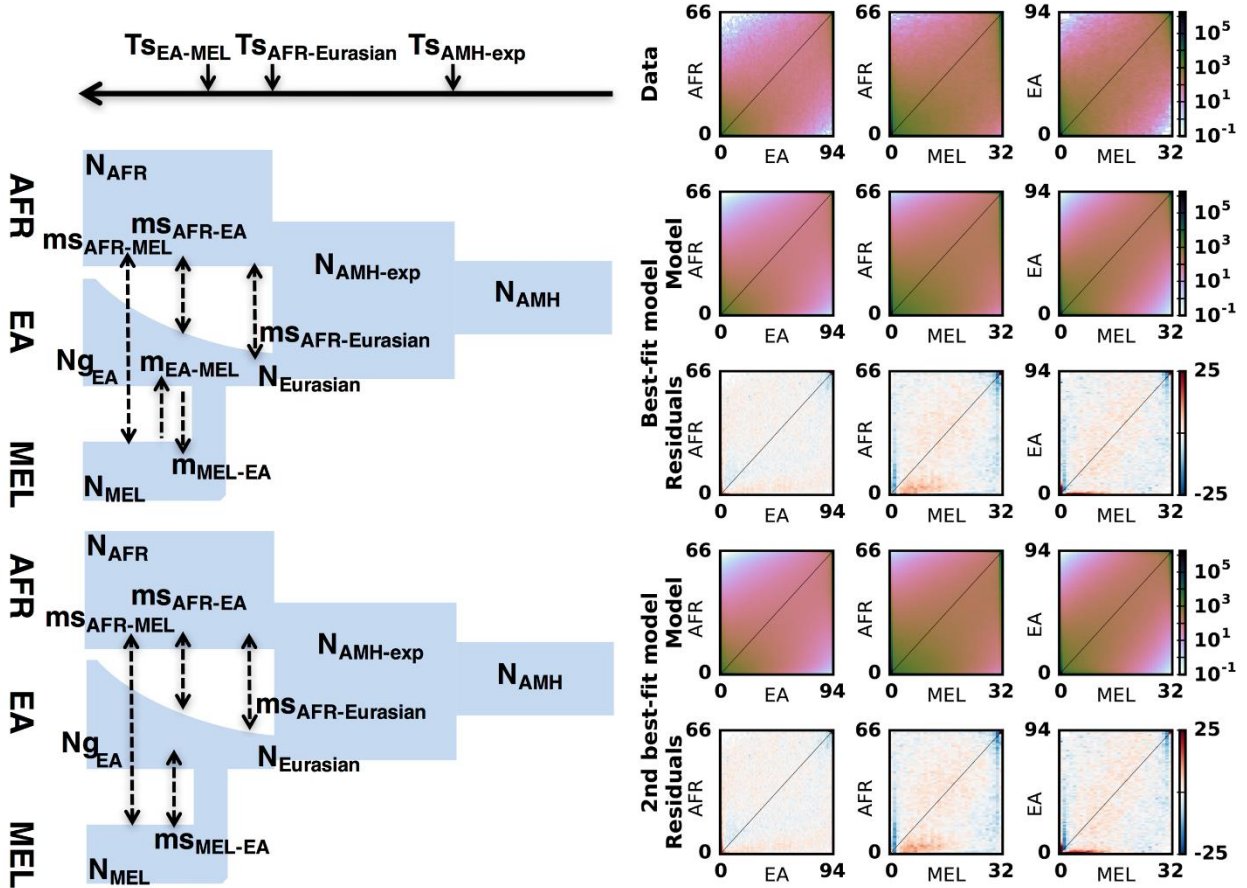

900  
 901 **Figure S7. Demographic inferences for Melanesians (MEL), Africans (AFR), and East Asians (EA)**  
 902 **using  $\partial a \hat{d} i$  (50).** The left panel illustrates the best-fit demographic model with asymmetric gene flow  
 903 between MEL and EA (top, 15 parameters, log-likelihood: -103386) and the 2<sup>nd</sup> best-fit model with  
 904 symmetric gene flow between the populations (bottom, 14 parameters, log-likelihood: -104590).  
 905 Corresponding maximum likelihood estimates for the parameters of the two models can be found in  
 906 **Table S7.** The right panel shows observed and predicted frequency spectra for the two best-fit models.  
 907 Row one is data, row two (the best-fit model) and four (the 2<sup>nd</sup> best-fit model) are models, and rows three  
 908 and five are Anscombe residuals of model minus data for the best- and 2<sup>nd</sup> best-fit models, respectively.  
 909 The range of Anscombe residuals is set to be [-25, 25] for better illustration.  
 910

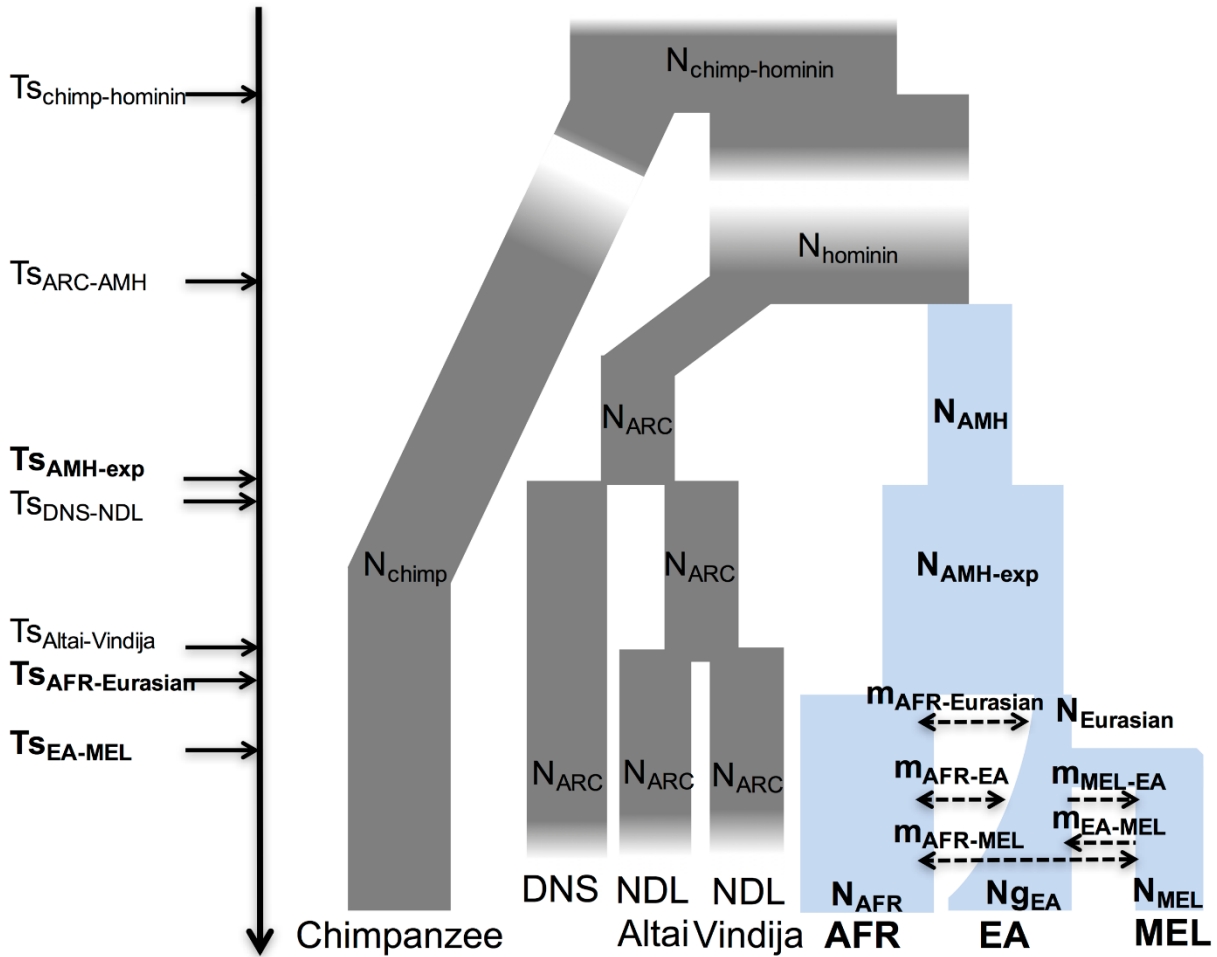

911  
 912 **Figure S8. Demographic schematic for large-scale genomic coalescent simulations.** Blue branches  
 913 and bold parameters indicate the best demographic model inferred in this study for the African, East  
 914 Asian, and Melanesian populations (**Figure S7; Table S7**). Parameter values of the gray branches were  
 915 uniformly drawn from the 95% C.I. reported in previous studies (**Table S8**). The white gradients  
 916 highlight the time scale for those branches are much larger than the others.  
 917



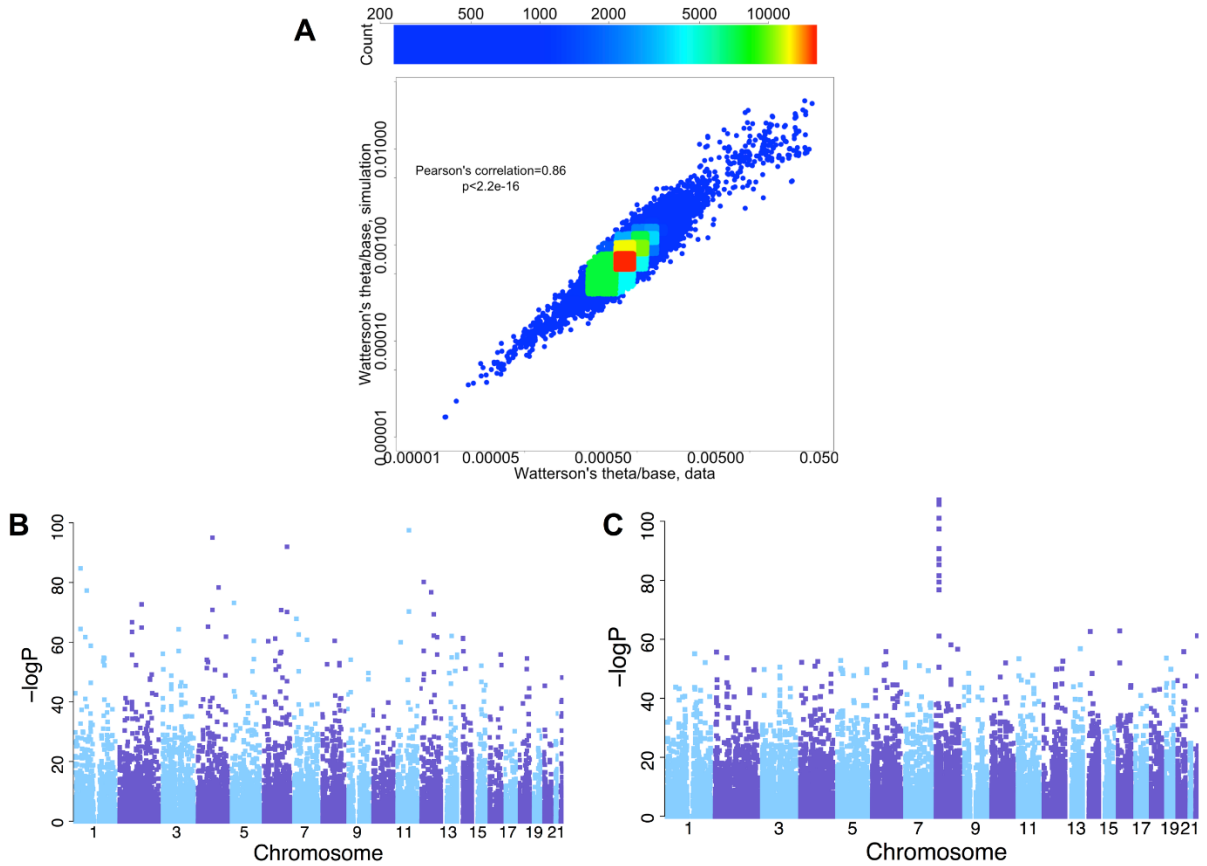

918  
 919 **Figure S9. Whole-genome simulations accurately capture the local genetic diversity in the real data.**  
 920 (A) Correlation of per-base  $\theta$  (Watterson's estimator) between windows in real and simulated whole-  
 921 genome data. Window are defined as in our selection scans (100 SNVs per window). Pearson's  
 922 correlation is 0.860. (B) Manhattan plot for the window-based  $F_{ST}$  test using a simulation based on one of  
 923 the 1,000 models. (C) Manhattan plot for the window-based  $F_{ST}$  test using the real data (MEL vs. EA).  
 924

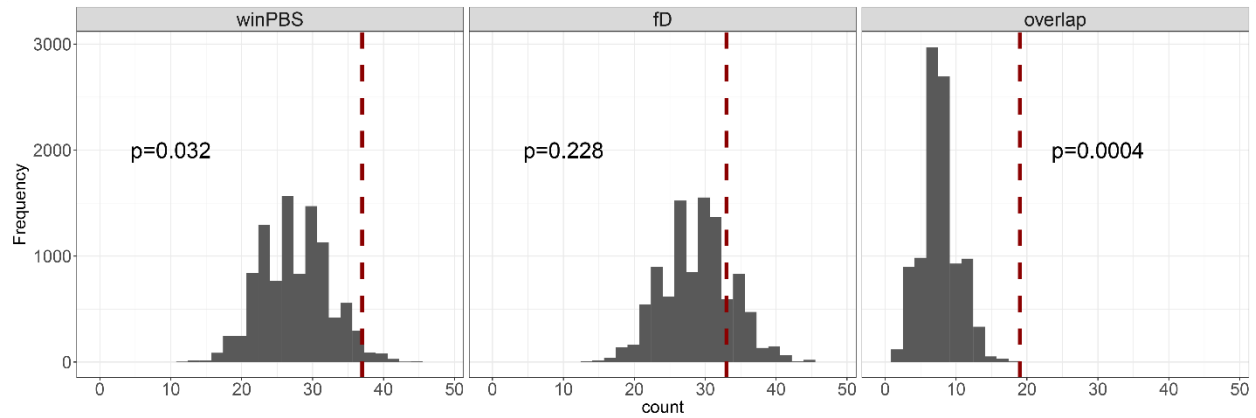

925  
 926  
 927  
 928  
 929  
 930  
 931  
 932  
 933

**Figure S10. Melanesian-stratified CNVs are significantly associated with loci showing signals of positive selection, but not with those of archaic introgression.** *P*-values were calculated using 10,000 simulations of the 162 stratified CNVs, which consists of 37 selective and 33 introgressed CNV candidate loci. Simulated CNV loci were generated by randomly shuffling these Melanesian-stratified CNVs across the unmasked sequences of the genome as defined in the real data (**Methods**). Red dashed lines are the observed numbers of candidate CNVs for selection and archaic introgression.

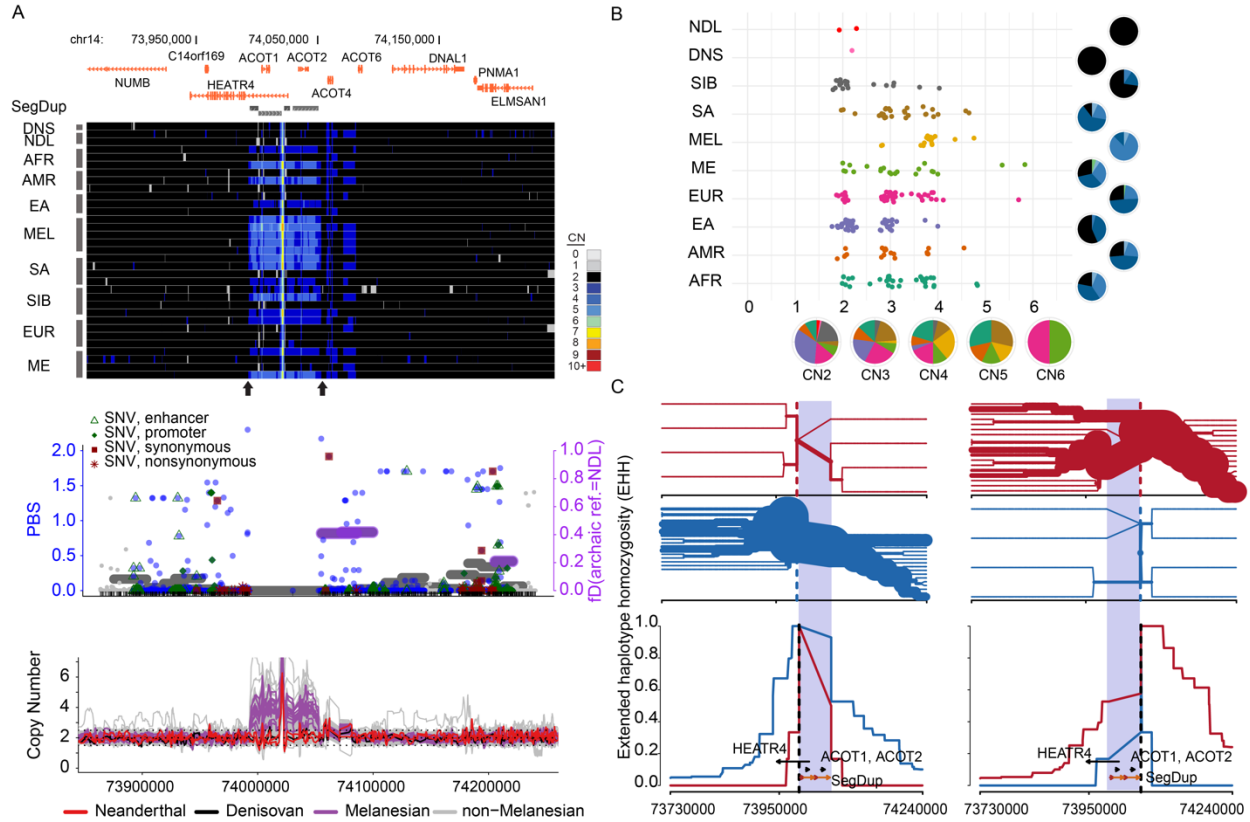

934  
 935 **Figure 11. Evidence for positive selection of the multi-allelic CNV locus in *ACOT* cluster ( $CNP_{ACOT1-2}$ , chr14:73,999,126-74,053,245) in Melanesians.**  
 936 **2, chr14:73,999,126-74,053,245) in Melanesians.**  
 937 Functional annotation (RefSeq and ENCODE elements) denoted by green symbols. **(B)** Distribution of  
 938 WSSD-based CN estimates of  $CNP_{ACOT1-2}$  (between two black vertical arrows) for the eight SGDP  
 939 populations and the three archaic samples. **(C)** The bifurcation diagrams (red: derived allele, blue:  
 940 ancestral allele) and EHH (bottom) of Melanesians using 1,460 SNVs from chr14:73,730,000-74,240,000.  
 941 Two dashed lines indicate two top PBS SNVs (left: rs4903119, PBS=2.29; right: rs8015976, PBS=2.17)  
 942 on each side of the  $CNP_{ACOT1-2}$ . Ancestral states were polarized according to the human–chimpanzee  
 943 alignment.  
 944

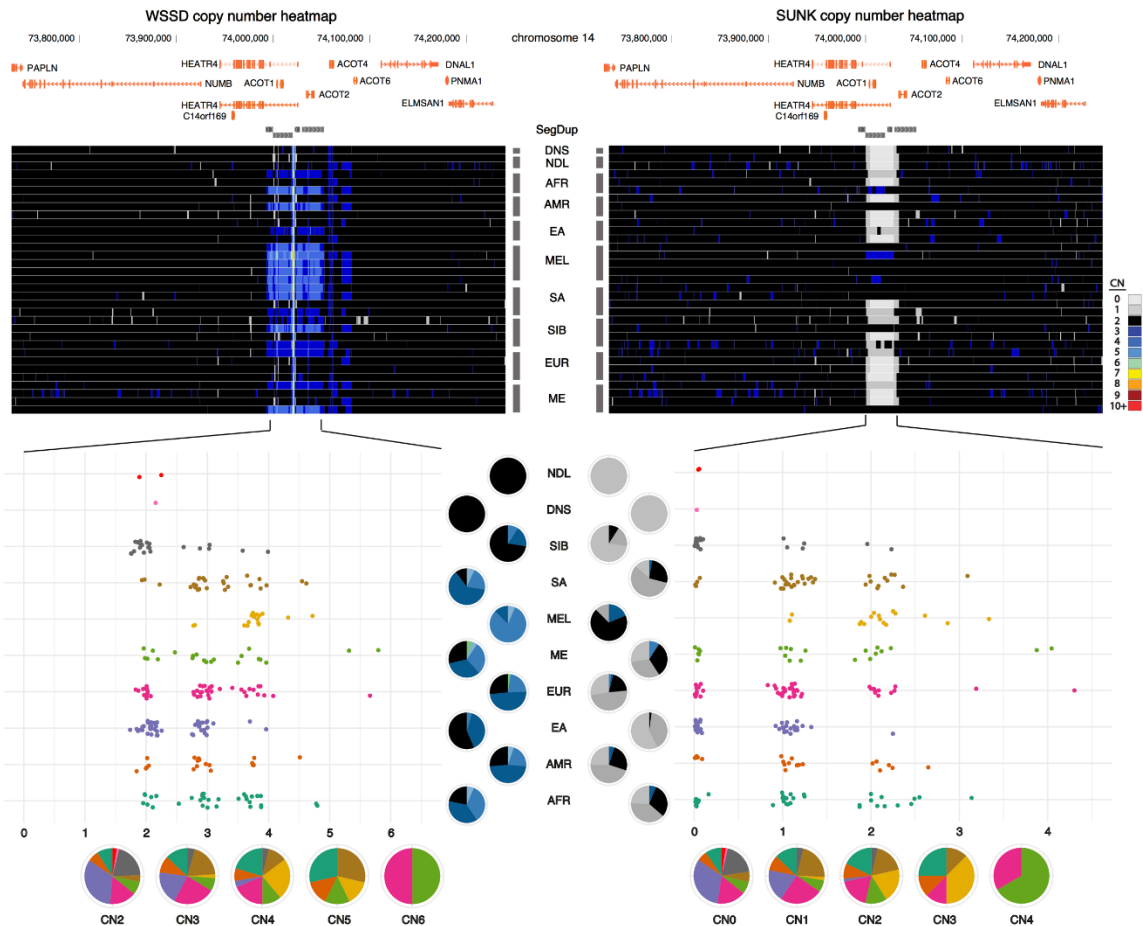

945  
 946 **Figure S12. Copy number distributions for the multi-allelic copy number variant**  
 947 **(chr14:73,999,126-74,053,245, CNP<sub>ACOT1-2</sub>) at the ACOT gene family on chromosome 14q24.** Left  
 948 panels: copy numbers were estimated using read-depth WSSD for *ACOT1* and *ACOT2*; right panels:  
 949 SUNK copy number estimates of the *ACOT1* locus. Top panels: copy number heat maps, where each row  
 950 represents the copy numbers of a sample over the region. Bottom panels: copy number distributions for  
 951 the variant among SGDP and three archaic samples. Pie charts on the x-axis indicate the population  
 952 distributions in individual copy numbers (colors corresponding to those in the scatterplots), while each pie  
 953 chart on the y-axis shows the frequency distribution of copy numbers for a given population (colors  
 954 corresponding to those in the copy number heat maps).  
 955

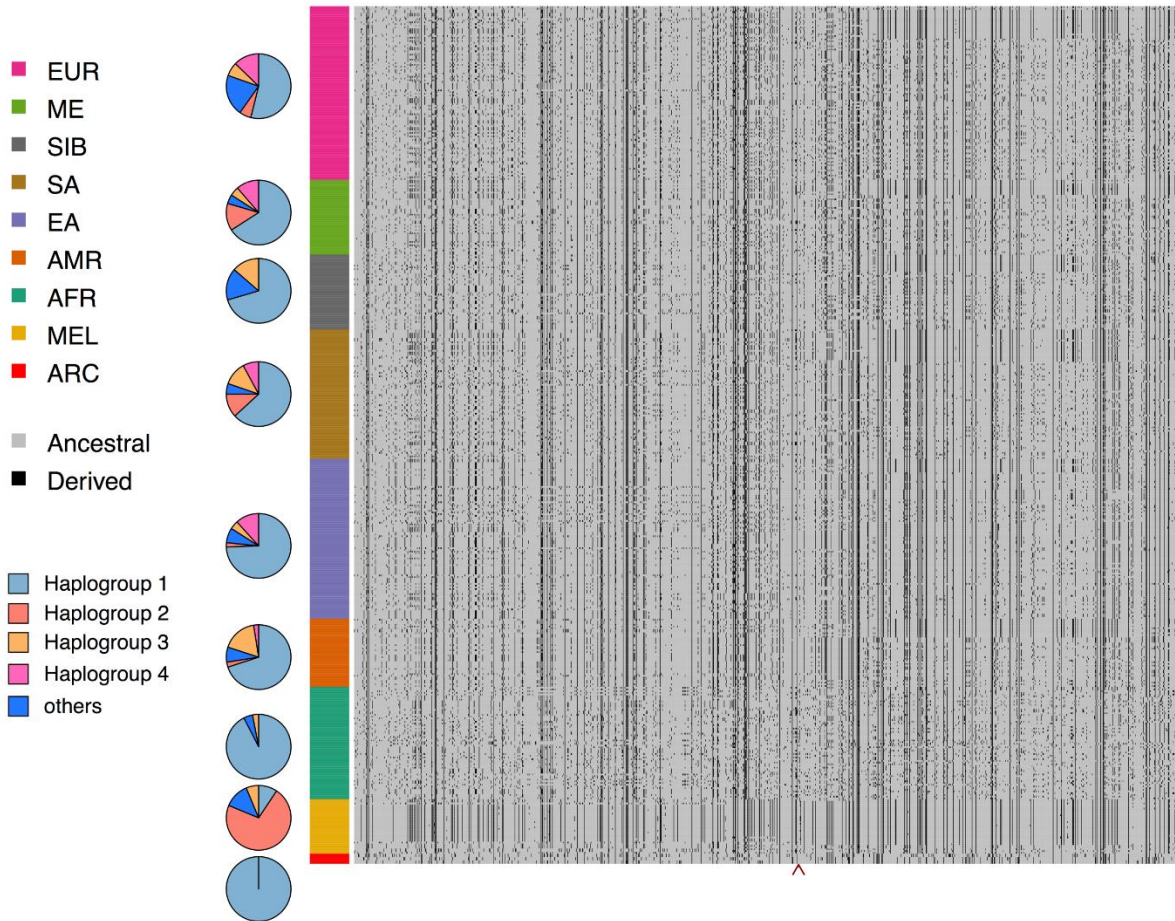

956  
 957 **Figure S13. Haplotype pattern in the region showing signals of positive selection at the 510 kbp**  
 958 **flanking sequences of the distal side of  $CNP_{ACOT1-2}$  on chromosome 14q24 (chr14:73,730,000-**  
 959 **74,240,000; 1,460 SNVs) among the SGDP and three archaic samples.** The rows and columns are  
 960 haplotypes and SNVs, respectively. Haplogroups were defined using all 1,460 SNVs. Haplogroups were  
 961 formed by using 97 SNVs with  $PBS > 0.5$  and grouping haplotypes with five mutations or less. To ease  
 962 the complexity of the plot, we only used the first four major haplogroups and grouped the rest into the  
 963 category “others” for display. Pie charts are the distribution of haplogroups in individual populations. The  
 964 red arrow indicates the position of the first SNV after  $CNP_{ACOT1-2}$ .  
 965

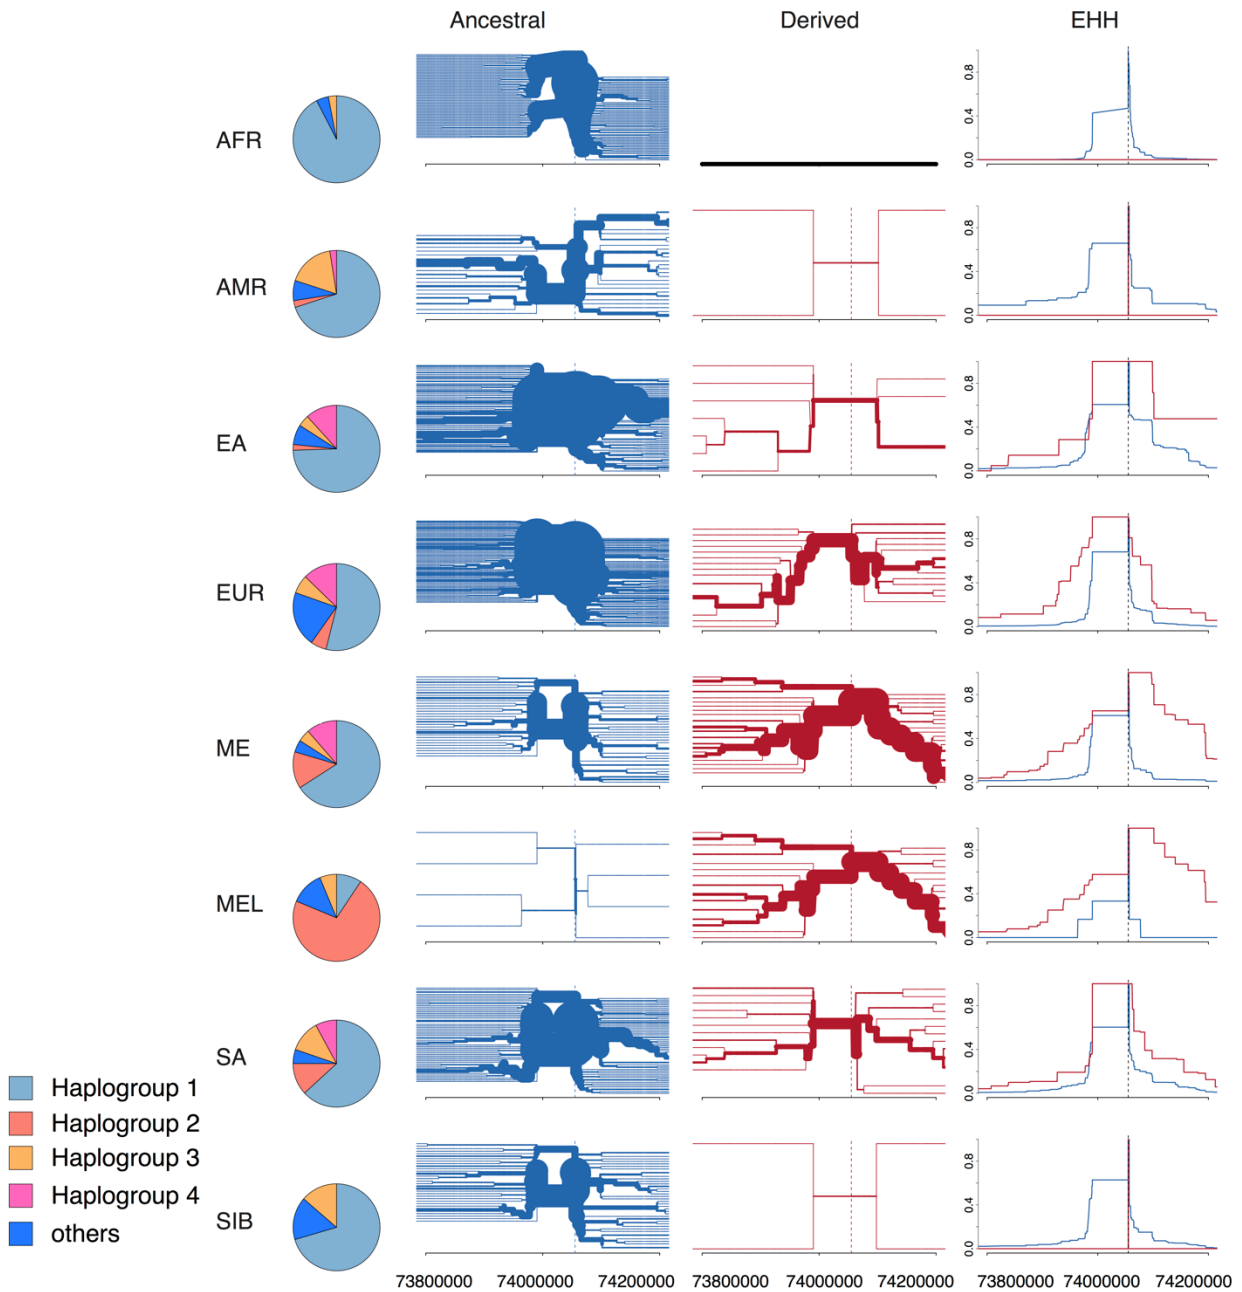

966  
 967  
 968  
 969  
 970  
 971

**Figure S14. Distribution of haplogroups, bifurcation diagrams, and EHH in individual populations using 1,460 SNVs from the region showing signatures of positive selection on chromosome 14q24 (chr14:73,730,000-74,240,000).** Dashed line indicates one of the SNVs with the largest *PBS* (rs8015976, *PBS*=2.17), whose ancestral state was polarized according to the human–chimpanzee alignment.

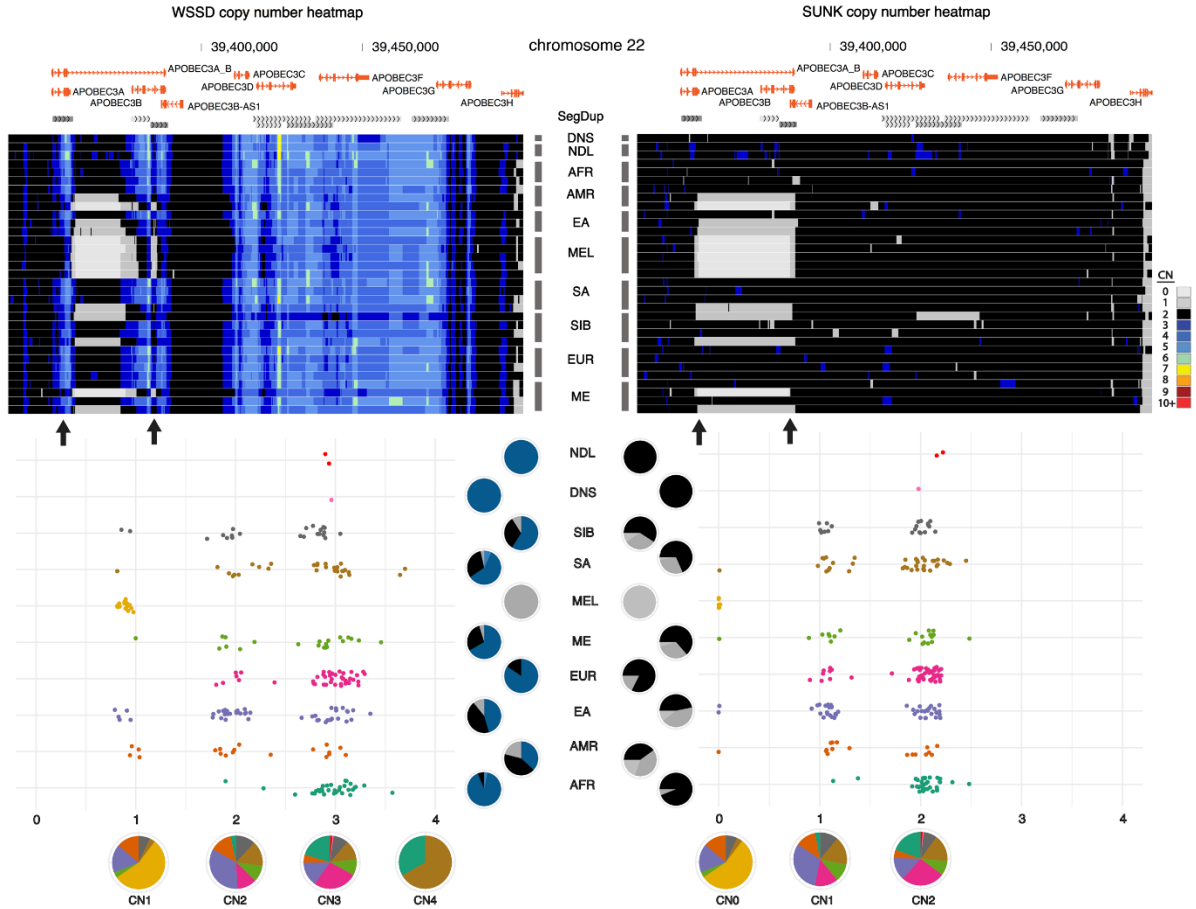

972  
973  
974  
975  
976  
977  
978  
979  
980  
981  
982

**Figure S15. CN distributions for the common deletion variant (region between two black arrows, chr22:39,388,950-39,483,917) at the *APOBEC3* gene cluster on chromosome 22.** Copy numbers were estimated using read-depth WSSD (left panels) and SUNK (right panels) genotyping methods. Top panels: CN heat maps, where each row represents the copy numbers of a sample over the region. Bottom panels: CN distributions for the variant among SGDP and three archaic samples. Pie charts on the x-axis indicate the population distributions in individual copy numbers (colors corresponding to those in the scatterplots), while each pie chart on the y-axis shows the frequency distribution of copy numbers for a given population (colors corresponding to those in the CN heat maps).

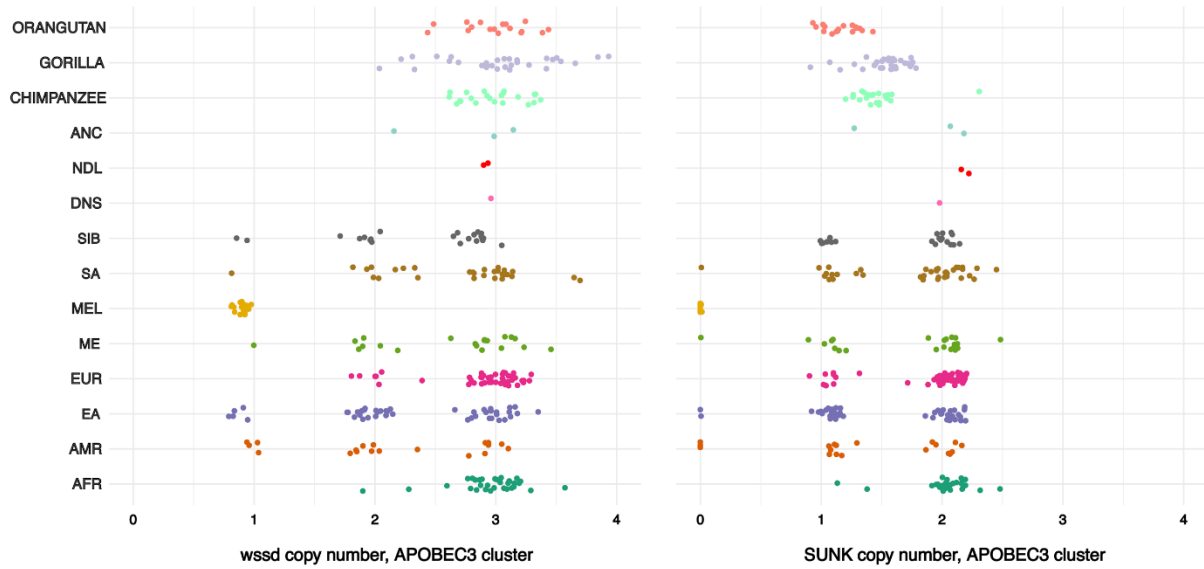

983  
 984  
 985  
 986  
 987  
 988  
 989

**Figure S16. WSSD- and SUNK-based CN distributions for the deletion locus (chr22:39,388,950-39,483,917) at the *APOBEC3* gene cluster among extant modern humans (SGDP), ancient modern humans (Stuttgart, Loschbour, and Ust-Ishim), and nonhuman great apes (chimpanzees, gorilla, and orangutans). Each point is a CN estimate of a sample for the variant.**



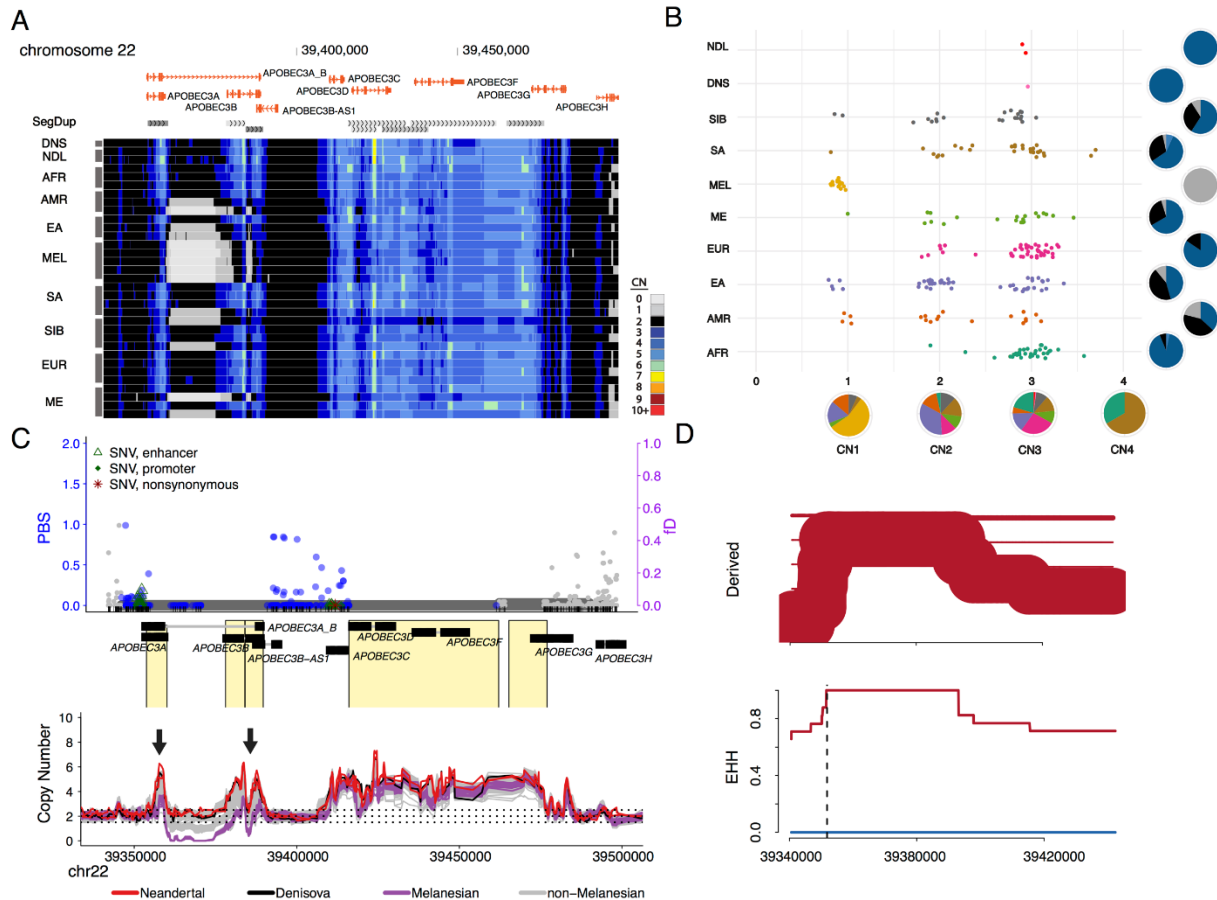

990  
 991  
 992 **Figure S17. Evidence for positive selection of the deletion locus in the *APOBEC3* gene cluster**  
 993 **(chr22:39,388,950-39,483,917) among Melanesians.** (A) CN heat map around the candidate region and  
 994 (B) the distribution of WSSD-based CN estimates for the eight SGDP populations and the three archaic  
 995 samples. (C) Significant signals of positive selection at the flanking sequences of the deletion locus in  
 996 Melanesians. Top panel: Distributions of  $PBS$  (left y-axis), functional annotation (RefSeq and ENCODE  
 997 elements; **Methods**) for all SNVs (dots), and the  $f_D$  (horizontal bars, representing windows of 100 SNVs).  
 998 Colored dots (blue) and horizontal bars (purple) indicate  $p$ -value < 0.05. Middle panel: SDs (light orange)  
 999 and genes (gray lines: noncoding sequences, black boxes: exons). Bottom panel: CN line plot, where the  
 1000 trajectory of each line shows the CN variation across the region for a given sample. The two black arrows  
 1001 indicate the breakpoints of the deletion. These panels are aligned to the panel A above. (D) The  
 1002 bifurcation diagram (top) and EHH (bottom) using 266 SNVs from the flanking sequences of the deletion  
 1003 locus (dashed line) showing signals of positive selection (chr22:39,340,000-39,450,000) in Melanesians.  
 1004 Note that none of the Melanesian samples carry non-deletion versions of haplotypes (see **Figures S18-**  
 1005 **S19** for comparison among populations).  
 1006

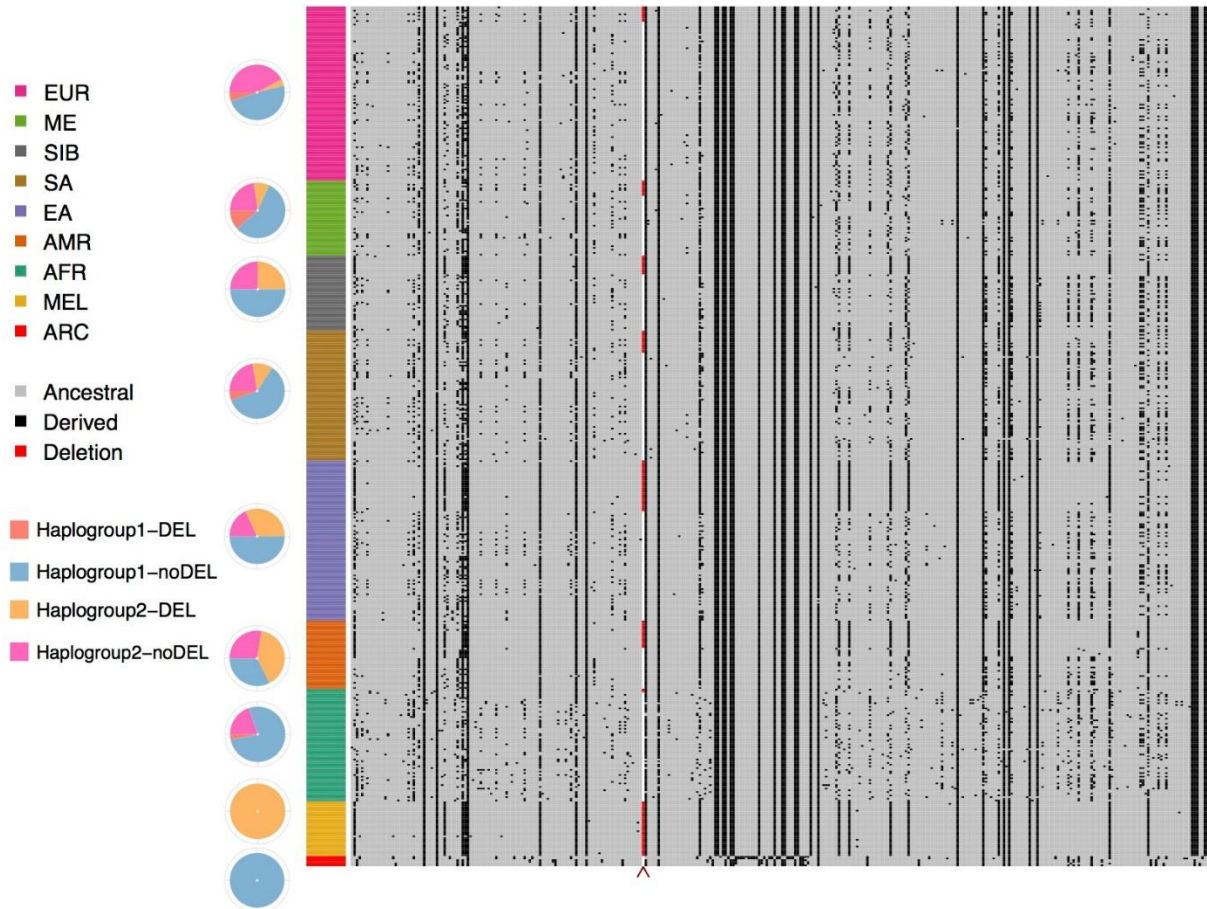

1007  
 1008  
 1009  
 1010  
 1011  
 1012  
 1013  
 1014  
 1015

**Figure S18. Haplotype pattern in the region shows signals of positive selection at the flanking sequences of the *APOBEC3* deletion (chr22:39,340,000-39,450,000; 266 SNVs) among the SGDP and three archaic samples.** The rows and columns are haplotypes and SNVs, respectively. The red carrot indicates the position of the deletion. Haplogroups were defined using nine SNVs with  $PBS > 0.5$ , including the deletion locus. Haplogroups were formed by first grouping haplotypes with five mutations or less, followed by the status of the deletion locus. Pie charts are the distribution of haplogroups in individual populations.

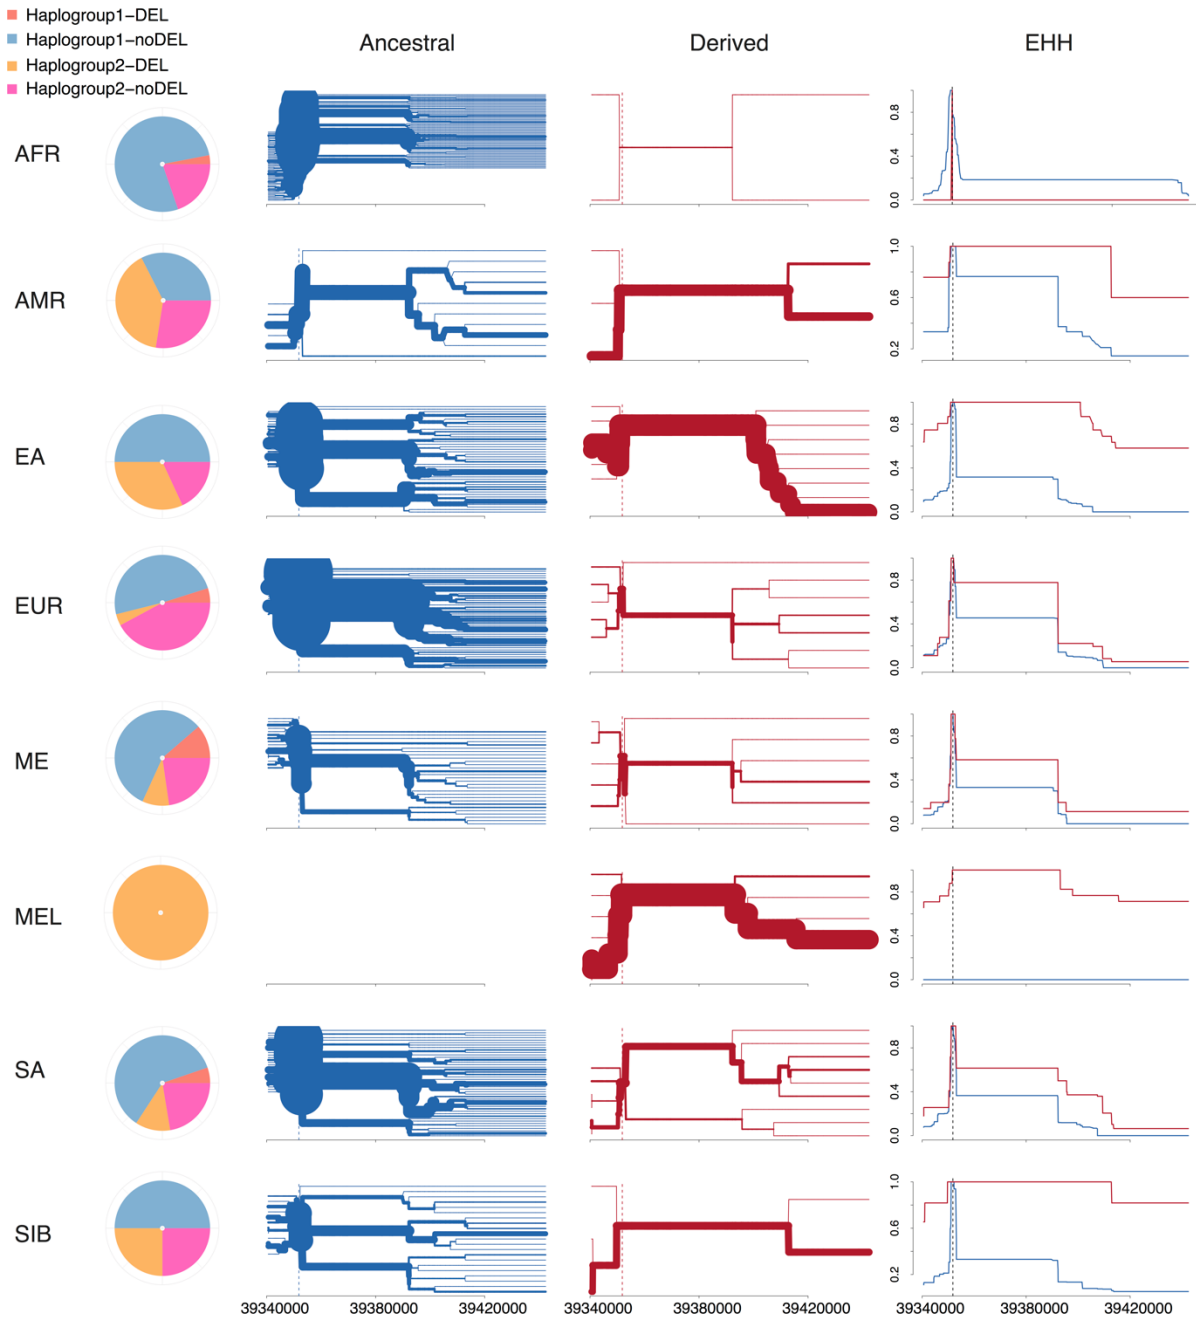

1016  
 1017  
 1018  
 1019  
 1020  
 1021  
 1022

**Figure S19. Distribution of haplogroups, bifurcation diagrams, and EHH in individual populations using 266 SNVs from the region showing signatures of positive selection (chr22:39,340,000-39,450,000) around the deletion at the *APOBEC3* gene cluster. Dashed line indicates the location of the *APOBEC3* deletion locus. Haplogroups were defined as described in **Figure S13**.**

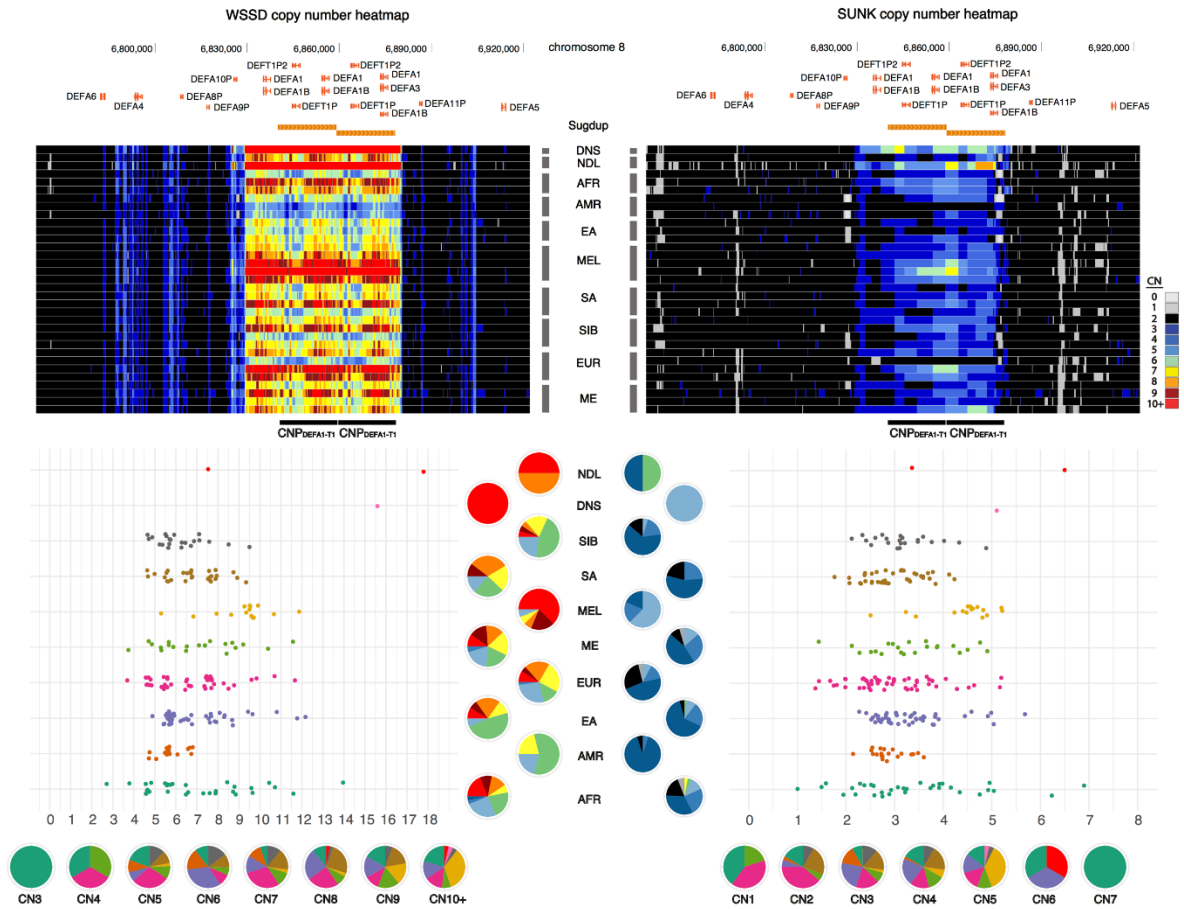

1023  
 1024  
 1025  
 1026  
 1027  
 1028  
 1029  
 1030  
 1031  
 1032  
 1033

**Figure S20. CN distributions for the multi-allelic CNV (chr8:6,839,960-6,878,169,  $CNP_{DEFA1-T1}$ ) at the *DEFA* gene cluster on chromosome 8.** Copy numbers were estimated using read-depth WSSD (left panels) and SUNK (right panels) genotyping methods. Top panels: CN heat maps, where each row represents the copy numbers of a sample over the region. Bottom panels: CN distributions for the variant among SGDP and three archaic samples. Pie charts on the x-axis indicate the population distributions in individual copy numbers (colors corresponding to those in the scatterplots), while each pie chart on the y-axis shows the frequency distribution of copy numbers for a given population (colors corresponding to those in the CN heat maps).

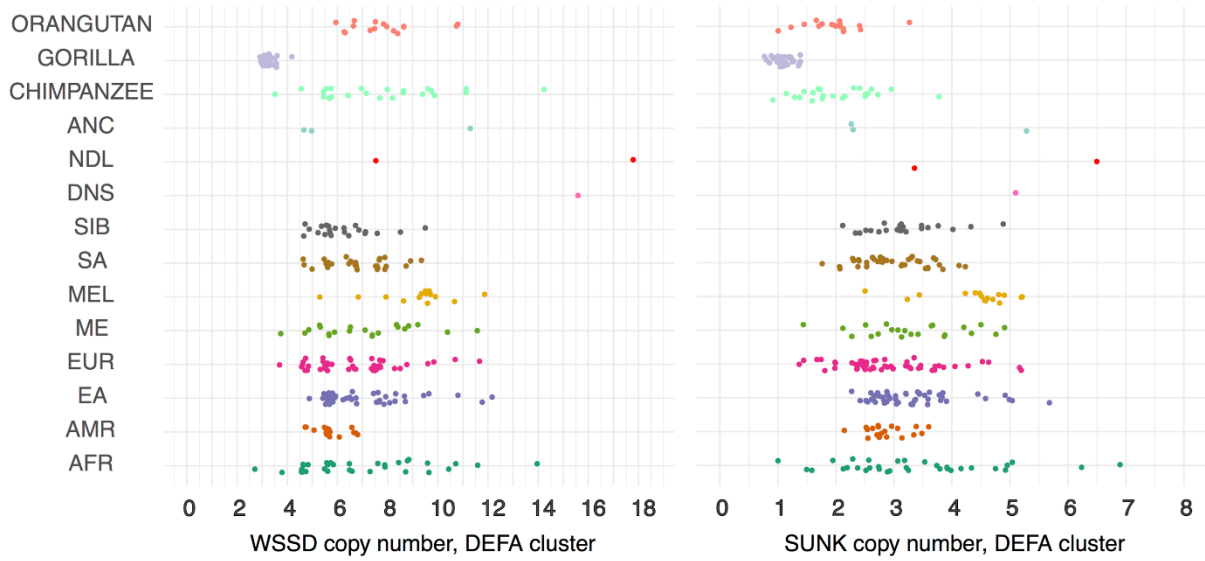

1034  
 1035  
 1036  
 1037  
 1038  
 1039

**Figure S21. WSSD- and SUNK-based CN distributions for the multi-allelic CNV locus ( $CNP_{DEFA1-T1}$ ; Figure S20) at the *DEFA* gene cluster among extant modern humans (SGDP), ancient modern humans (Stuttgart, Loschbour, and Ust-Ishim), and nonhuman great apes (chimpanzees, gorilla, and orangutans). Each point is a CN estimate of a sample for the variant.**

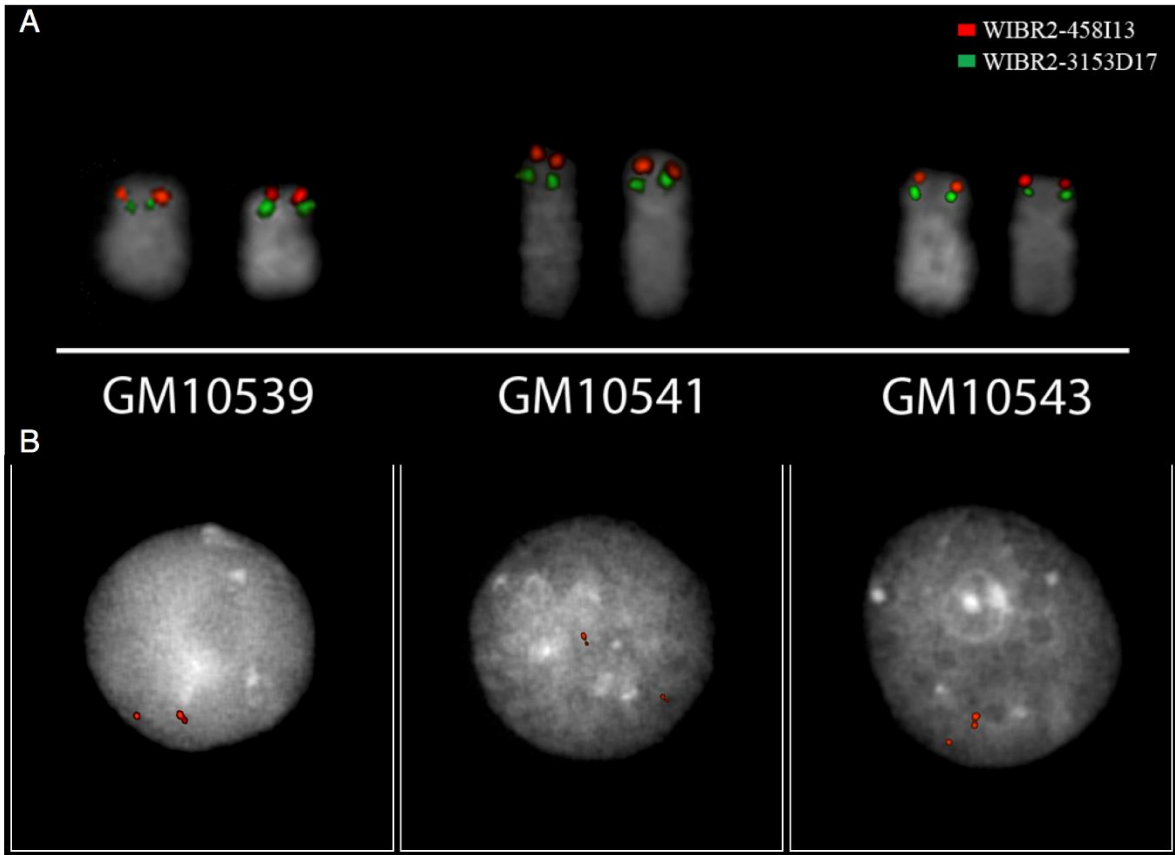

1040  
 1041 **Figure S22. Metaphase (A) and interphase (B) FISH experiments for three Melanesian cell lines**  
 1042 **reveal the direct orientation of chromosome 8p23.1 and the tandem organization of the CNP<sub>DEFA1-T1</sub>**  
 1043 **duplications, respectively.** (A) The order of the two fosmid clones, WIBR2-458I13 (red) and WIBR2-  
 1044 3153D17 (green), shows that all three individuals are in direct orientation for the 8p23.1 locus as  
 1045 represented in human reference genome (GRCh37). (B) The probe, WIBR2-2984I16 (chr8:6983382-  
 1046 7003217, red), queries the sequences at the junction of the two CNP<sub>DEFA1-T1</sub> segments.  
 1047

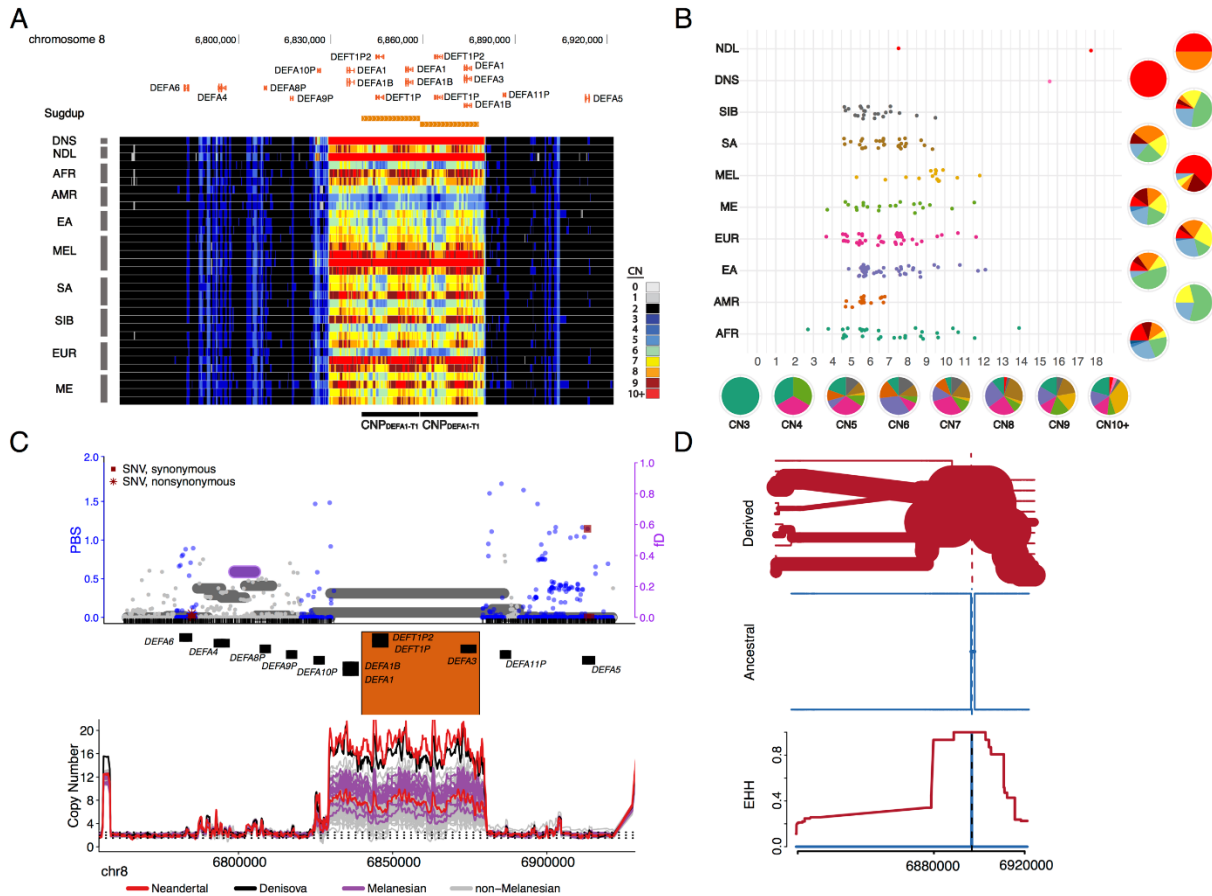

1048  
1049 **Figure S23. Evidence for positive selection of the multi-allelic CNV locus in the *DEFA* gene cluster**  
1050 **( $CNP_{DEFA1-T1}$ , chr8:6,839,960-6,878,169) in Melanesians.** (A) CN heat map around the candidate region  
1051 and (B) the distribution of WSSD-based CN estimates for the eight SGDP populations and the three  
1052 archaic samples. (C) Significant signals of positive selection at the flanking sequences of the candidate  
1053 locus in Melanesians. Top panel: Distributions of *PBS* (left y-axis), functional annotation (RefSeq and  
1054 ENCODE elements; **Methods**) for all SNVs (dots), and the  $f_D$  (horizontal bars, representing windows of  
1055 100 SNVs). Colored dots (blue) and horizontal bars (purple) indicate  $p$ -value < 0.05. Middle panel: SDs  
1056 (light orange) and genes (gray lines: noncoding sequences, black boxes: exons); Bottom panel: CN line  
1057 plot, where the trajectory of each line shows the CN variation across the region for a given sample. These  
1058 panels are aligned to panel A above. (D) The bifurcation diagram (top) and EHH (bottom) using 855  
1059 SNVs from the flanking sequences of the candidate CNV locus showing signals of positive selection  
1060 (chr8:6,819,244-6,921,178) in Melanesians. Dashed line indicates one of the SNVs of the largest *PBS*  
1061 values (chr8:6,896,688, *PBS*=1.5), whose ancestral state was polarized according to the human–  
1062 chimpanzee alignment.  
1063

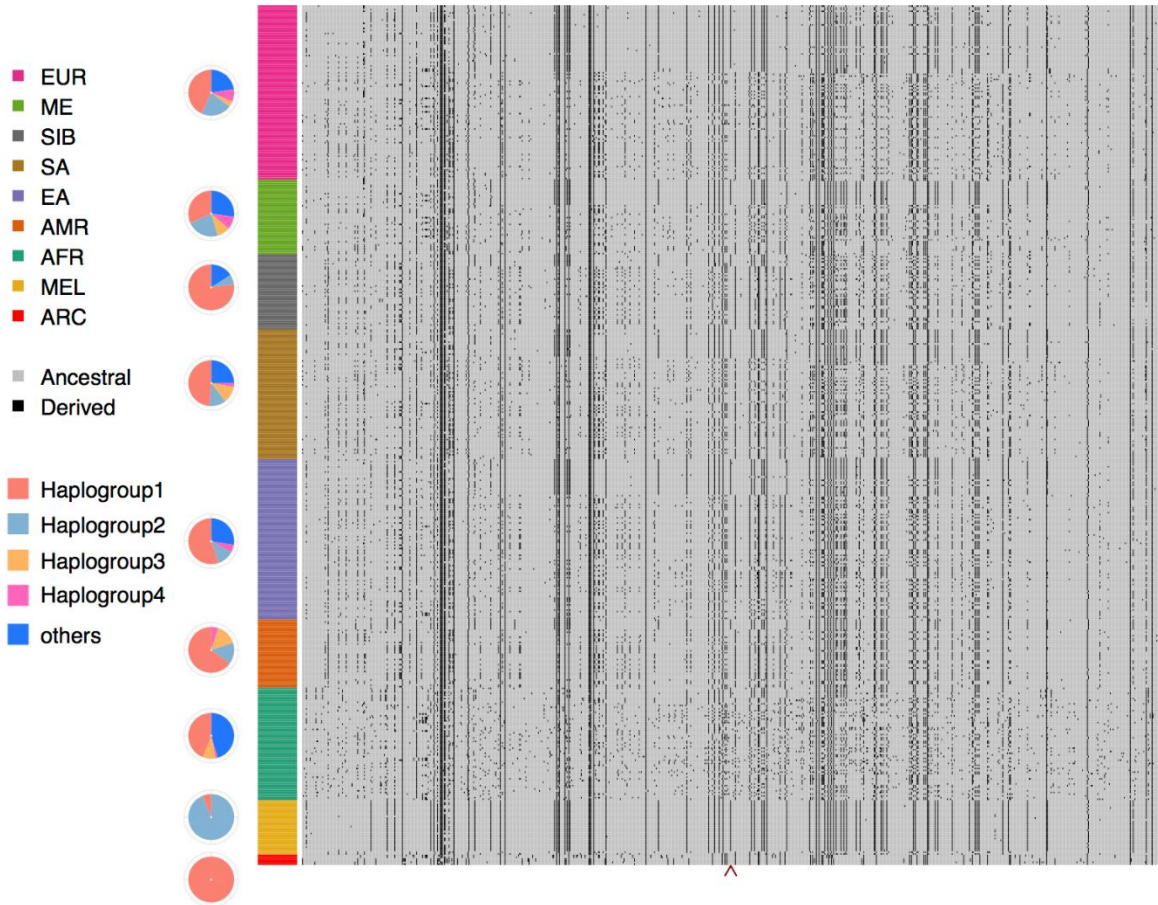

1064  
 1065  
 1066  
 1067  
 1068  
 1069  
 1070  
 1071  
 1072  
 1073

**Figure S24. Haplotype pattern in the region showing signals of positive selection at the flanking sequences of the multi-allelic CNV within *DEFA* gene cluster (chr8:6,839,960-6,878,169; 855 SNVs) among the SGDP and three archaic samples.** The rows and columns are haplotypes and SNVs, respectively. The red carot indicates the position of the first SNV after the CNV locus. Haplogroups were defined using 36 SNVs with  $PBS > 0.5$ . Haplogroups were formed by grouping haplotypes with five mutations or less. To ease the complexity of the plot, we only used the first four major haplogroups (>23 haplotypes per group) and grouped the rest into the category “others” for display. Pie charts are the distribution of haplogroups in individual populations.



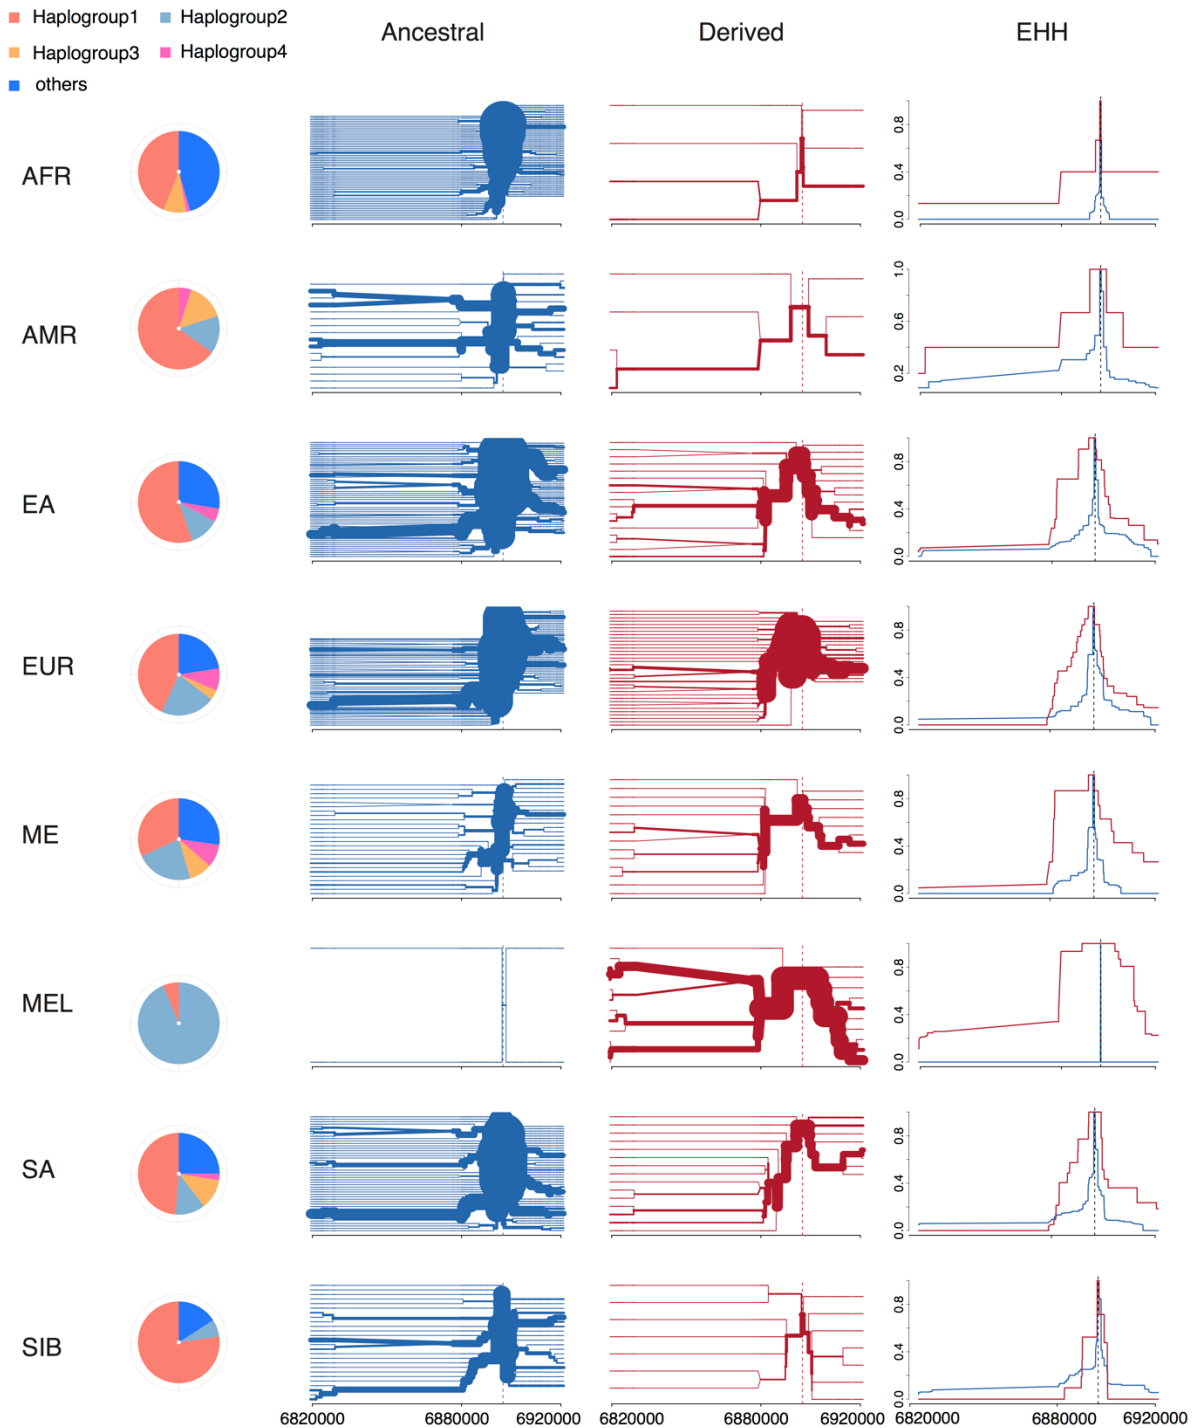

1074  
 1075  
 1076  
 1077  
 1078  
 1079  
 1080

**Figure S25. Distribution of haplogroups, bifurcation diagrams, and EHH in individual populations using 855 SNVs from the region showing signatures of positive selection (chr8:6,839,960-6,878,169) around the multi-allelic CNV locus at the *DEFA* gene cluster. Dashed line indicates one of the SNVs with the largest *PBS* (chr8:6,896,688, *PBS*=1.5), whose ancestral state was polarized according to the human–chimpanzee alignment.**

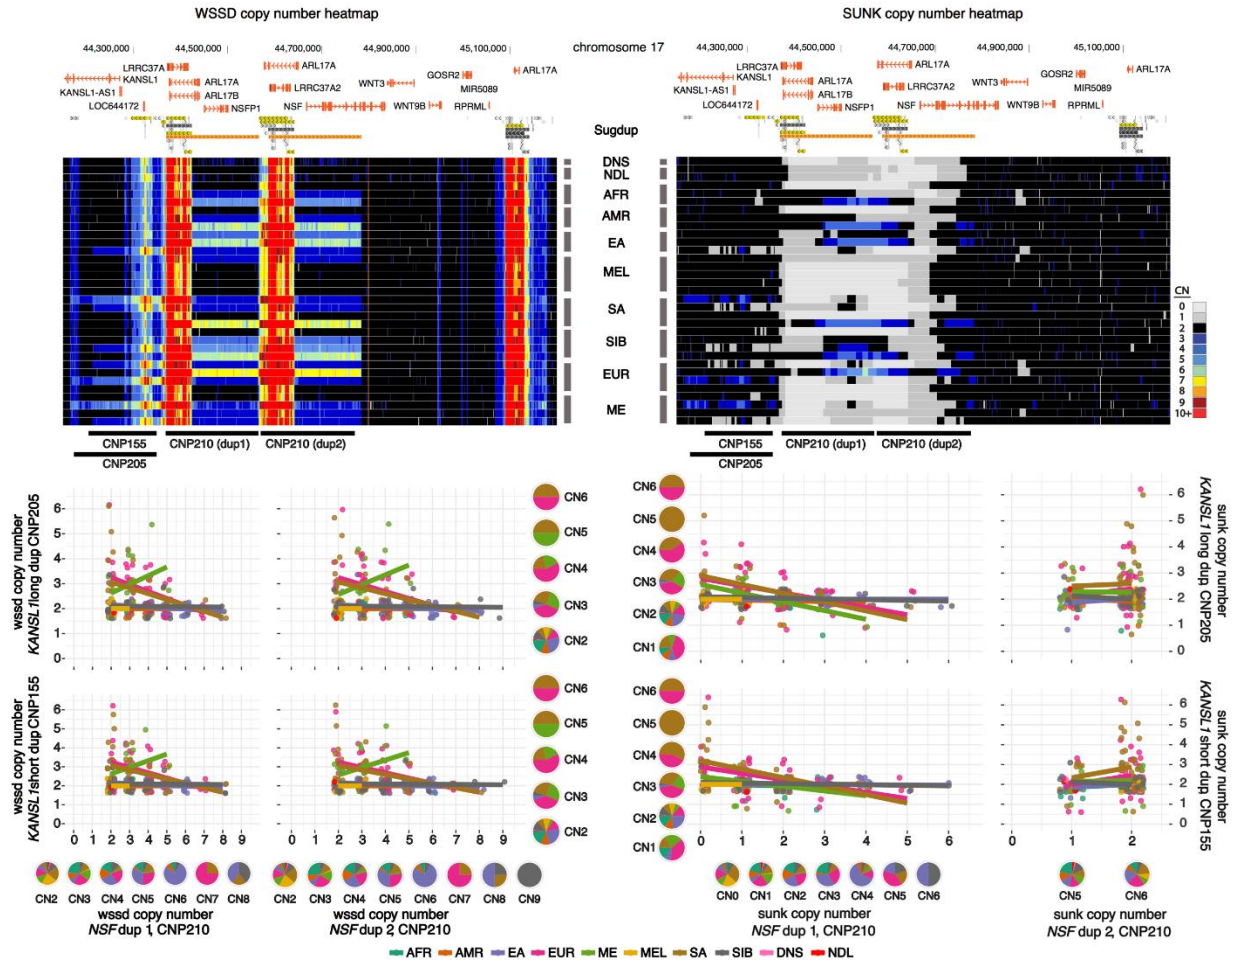

1081  
 1082  
 1083  
 1084  
 1085  
 1086  
 1087  
 1088  
 1089  
 1090  
 1091

**Figure S26. CN distributions for the three large CN polymorphic duplications (CNP155, CNP205, CNP210-dup1, and CNP210-dup2) at the chromosomal 17q21.31 locus.** Copy numbers were estimated using read-depth WSSD (left panels) and SUNK (right panels) genotyping methods. Top panels: CN heat maps, where each row represents the copy numbers of a sample over the region. Bottom panels: Pairwise distributions of CN estimates for the three CN polymorphic loci among the SGDP and three archaic samples. Colors of dots represent individual populations, and regression lines for individual populations were shown. Pie charts on both axes indicate the population distributions in individual copy numbers (colors corresponding to those in the scatterplots).

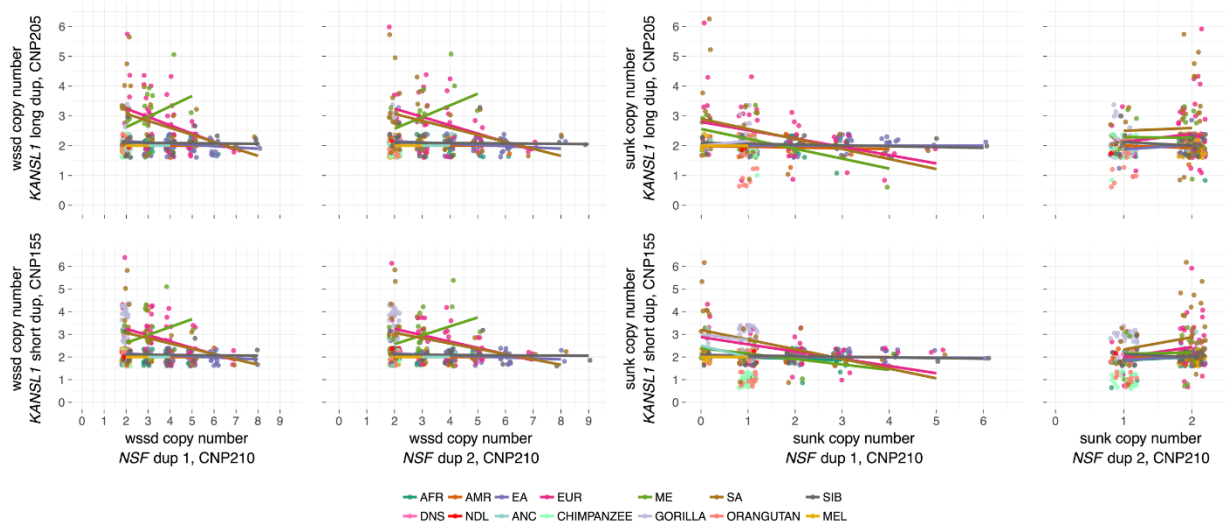

1092  
 1093  
 1094  
 1095  
 1096  
 1097  
 1098  
 1099  
 1100

**Figure S27. Pairwise distributions of WSSD- (left panels) and SUNK- (right panels) based CN estimates for CNP155, CNP205, CNP210-dup1, and CNP210-dup2 (Figure S21) among SGDP and nonhuman great ape samples. Colors of dots represent individual populations, and regression lines for individual populations were shown.**

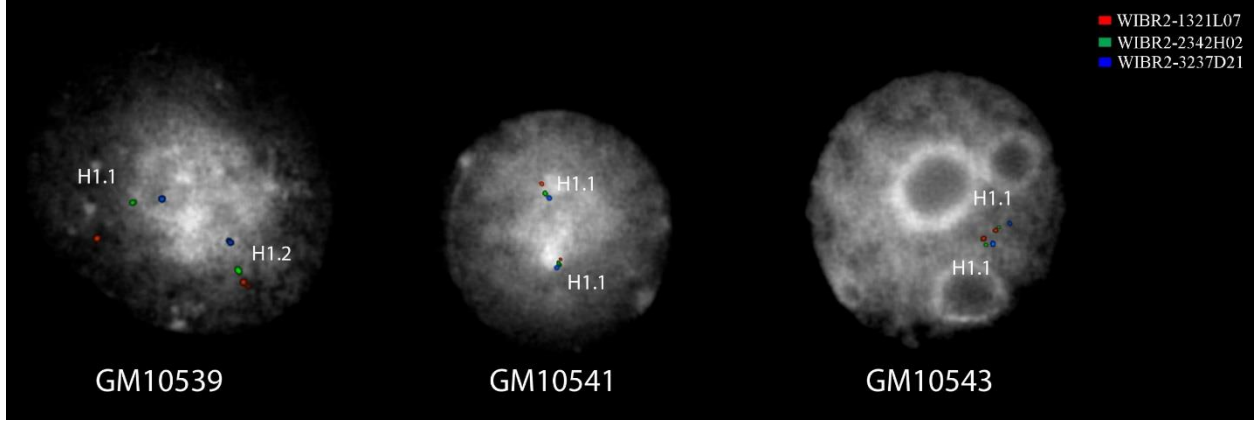

1101  
 1102  
 1103  
 1104  
 1105  
 1106  
 1107  
 1108

**Figure S28. FISH experiments for the chromosome 17q21.31 locus using three Melanesian cell lines. All three individuals carry the direct haplotype, with GM10541 and GM10543 carrying only one copy of the CNP210 (WIBR2-1321L07, red) on both chromosomes (homozygous H1.1/ H1.1); GM10539 is heterozygous with one copy of the CNP210 on one chromosome and two copies on the other chromosome (heterozygous H1.1/H1.2).**

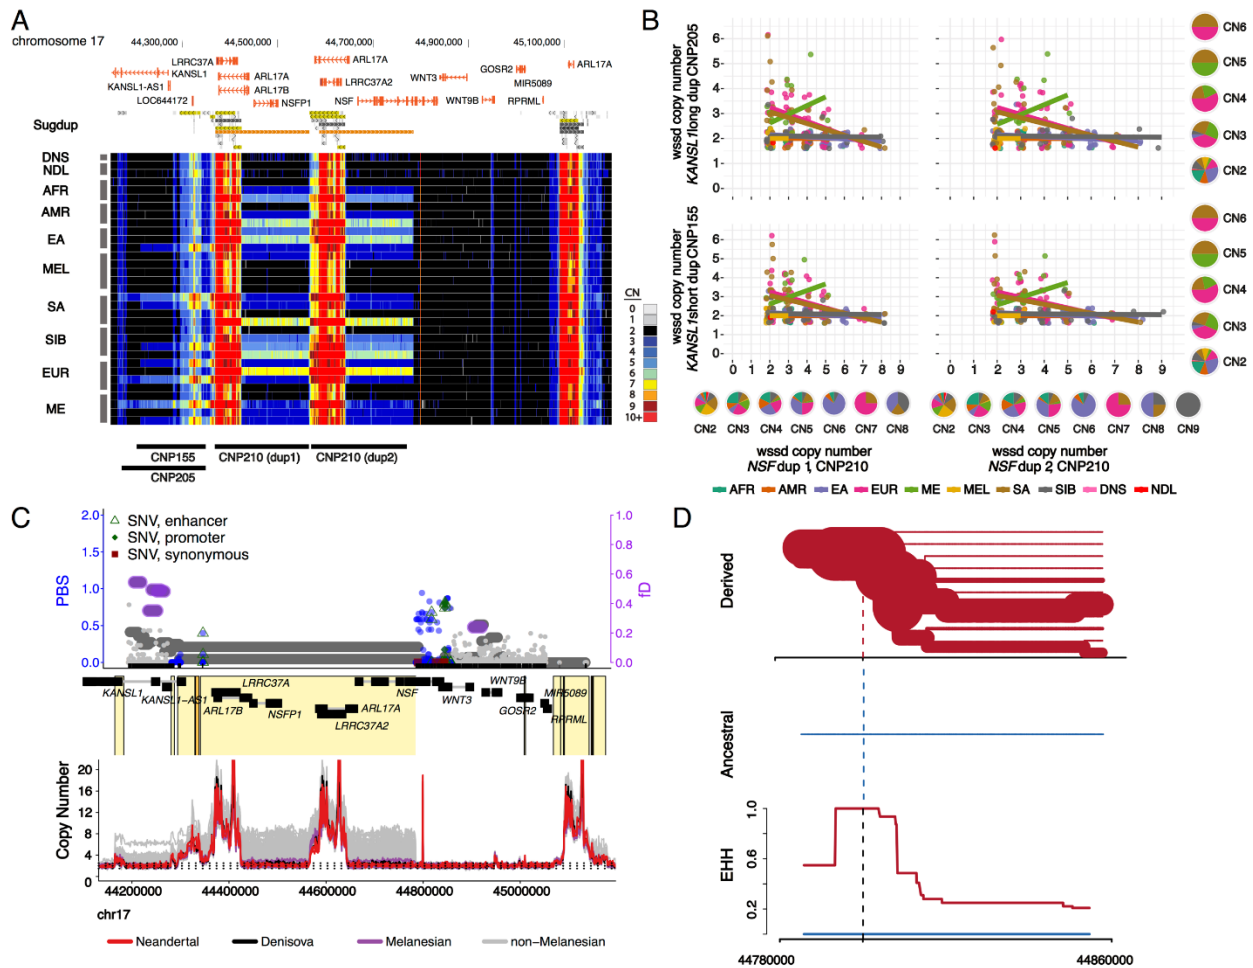

1109  
 1110  
 1111  
 1112  
 1113  
 1114  
 1115  
 1116  
 1117  
 1118  
 1119  
 1120  
 1121  
 1122  
 1123  
 1124

**Figure S29. Evidence for positive selection at the chromosomal 17q21.31 locus in Melanesians.** (A) CN heat map around the candidate region and (B) the distribution of WSSD-based CN estimates for the eight SGDP populations and the three archaic samples. (C) Significant signals of positive selection at the flanking sequences of the candidate locus in Melanesians. Top panel: Distributions of  $PBS$  (left y-axis), functional annotation (RefSeq and ENCODE elements; **Methods**) for all SNVs (dots), and the  $f_D$  (horizontal bars, representing windows of 100 SNVs). Colored dots (blue) and horizontal bars (purple) indicate  $p$ -value  $< 0.05$ . Middle panel: SDs (light orange) and genes (gray lines: noncoding sequences, black boxes: exons); Bottom panel: CN line plot, where the trajectory of each line shows the CN variation across the region for a given sample. These panels are aligned to panel A above. (D) The bifurcation diagram (top) and EHH (bottom) using 367 SNVs from the flanking sequences flanking the distal side of the CNP210-dup2 showing signals of positive selection (chr17:44,784,657–44,854,722) in Melanesians. Dashed line indicates one of the SNVs of the largest  $PBS$  values (chr8:44,800,046,  $PBS=0.94$ ), whose ancestral state was polarized according to the human–chimpanzee alignment.

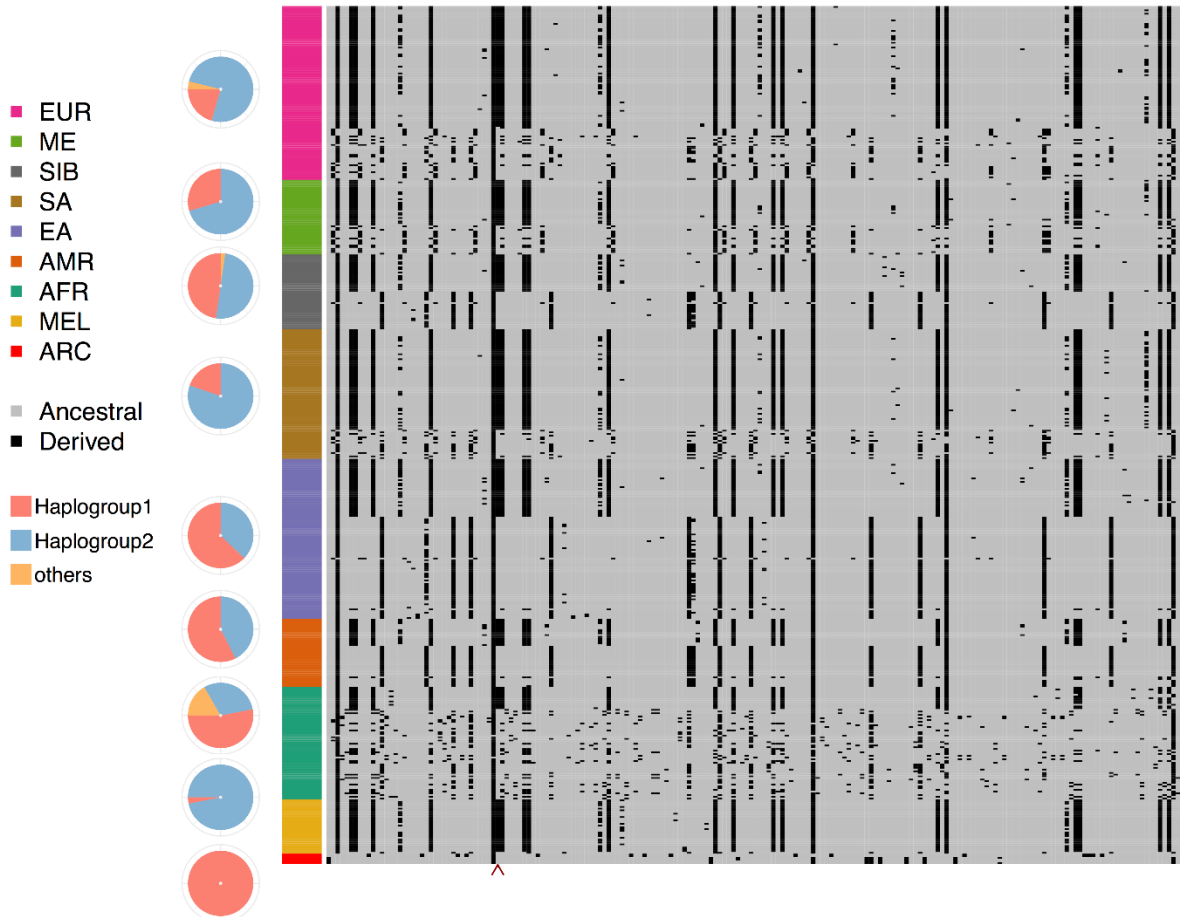

1125  
 1126  
 1127  
 1128  
 1129  
 1130  
 1131  
 1132  
 1133  
 1134

**Figure S30. Haplotype pattern in the region showing signals of positive selection at the flanking sequences of the distal side of CNP210-dup2 on chromosome 17q21.31 (chr17:44,784,657-44,854,722; 367 SNVs) among the SGDP and three archaic samples.** The rows and columns are haplotypes and SNVs, respectively. Haplogroups were defined using 24 SNVs with  $PBS > 0.5$ . Haplogroups were formed by grouping haplotypes with five mutations or less. To ease the complexity of the plot, we only used the first two major haplogroups and grouped the rest into the category “others” for display. Pie charts are the distribution of haplogroups in individual populations. The red carot indicates the position of the SNV with largest  $PBS$  value at this region (chr8:44,800,046,  $PBS=0.94$ ).

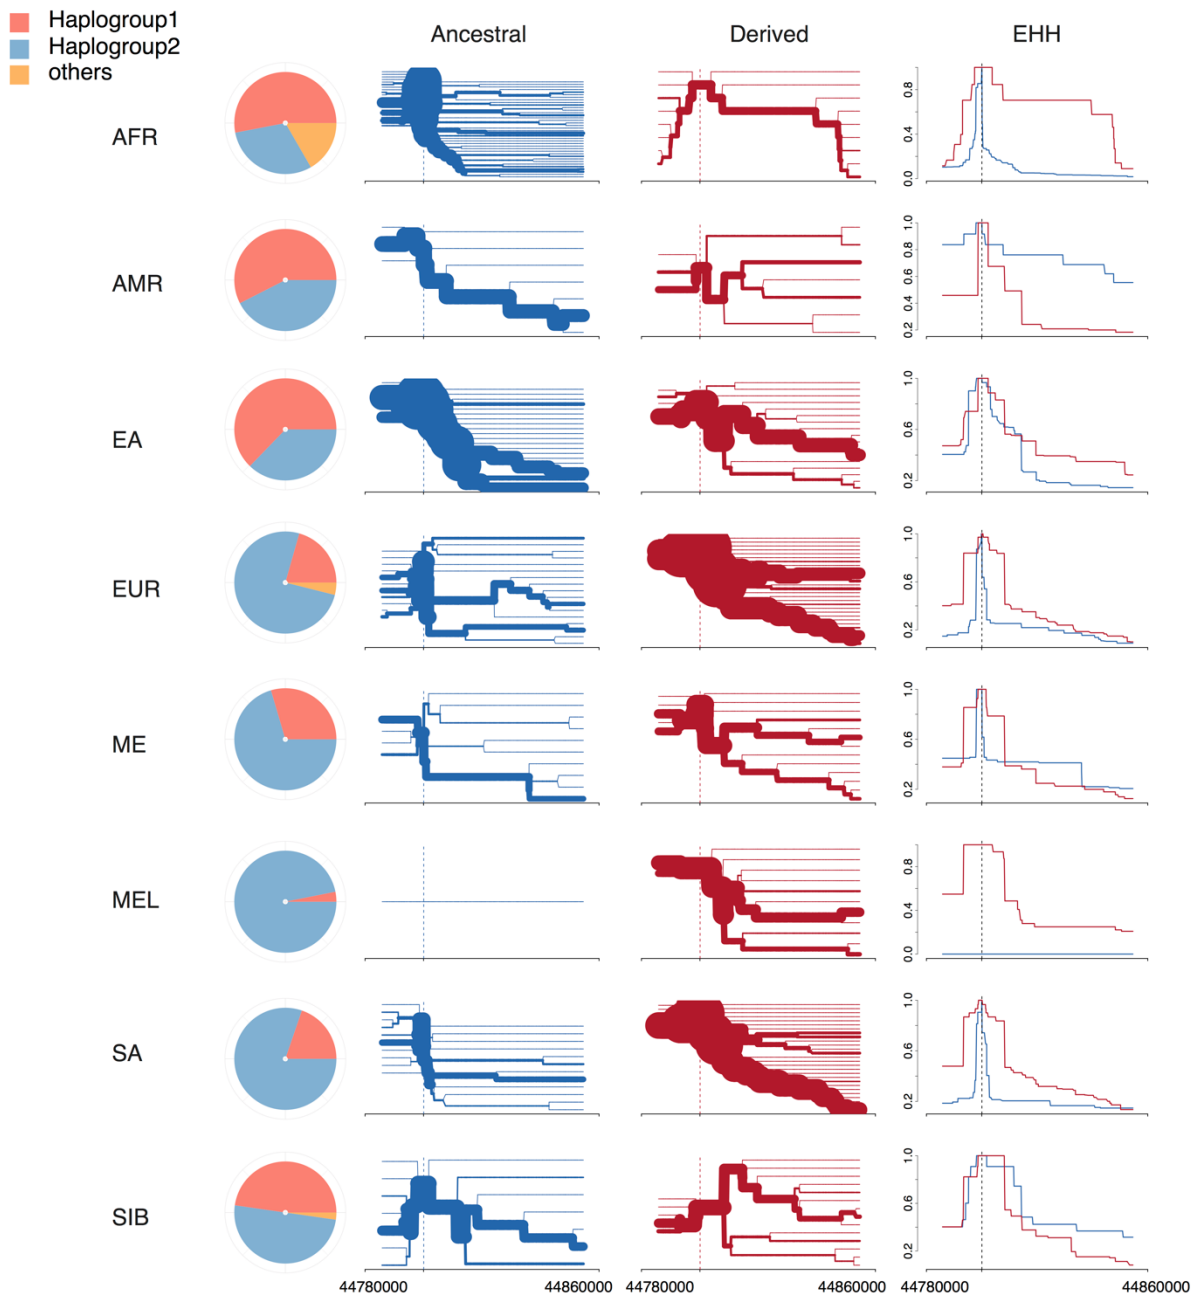

1135  
 1136  
 1137  
 1138  
 1139  
 1140  
 1141

**Figure S31. Distribution of haplogroups, bifurcation diagrams, and EHH in individual populations using 367 SNVs from the region showing signatures of positive selection on chromosome 17q21.31 (chr17:44,784,657-44,854,722; 367 SNVs). Dashed line indicates one of the SNVs with the largest *PBS* (chr8:44,800,046, *PBS*=0.94), whose ancestral state was polarized according to the human–chimpanzee alignment.**

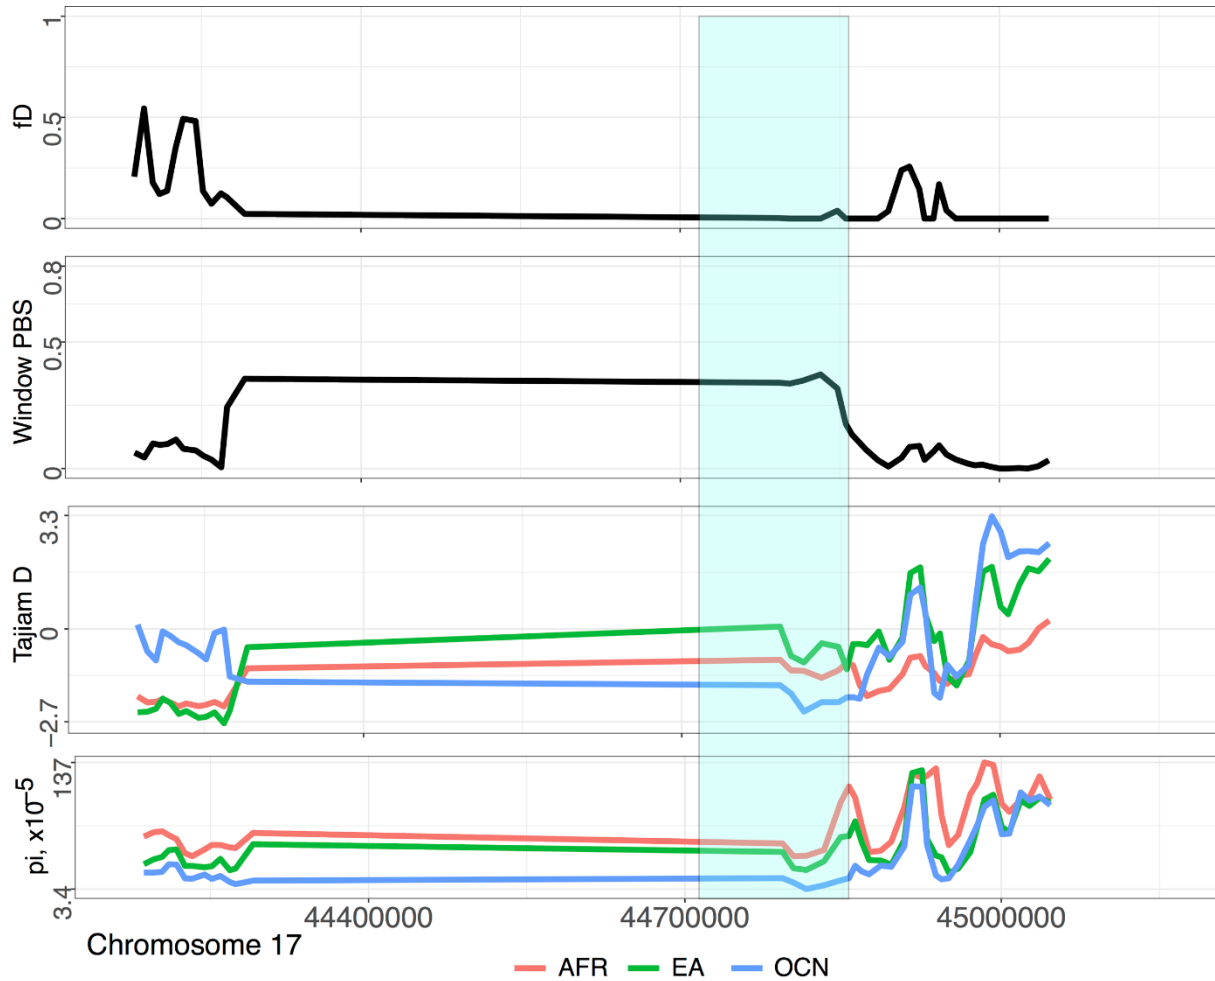

1142  
 1143 **Figure S32. Test statistics for searching signatures of archaic introgression ( $f_D$ ) and selection ( $PBS$ ,  
 1144 Tajima's  $D$ , and  $\pi$ ) at the chromosome 17q21.31 locus in Melanesians.** Note that all statistics were  
 1145 calculated using windows of 100 SNVs across the region. For comparison, statistics using AFR and EA  
 1146 samples were also plotted for both Tajima's  $D$  and  $\pi$ . Light green shaded rectangle indicates the flanking  
 1147 region of the distal side of CNP210-dup2.  
 1148

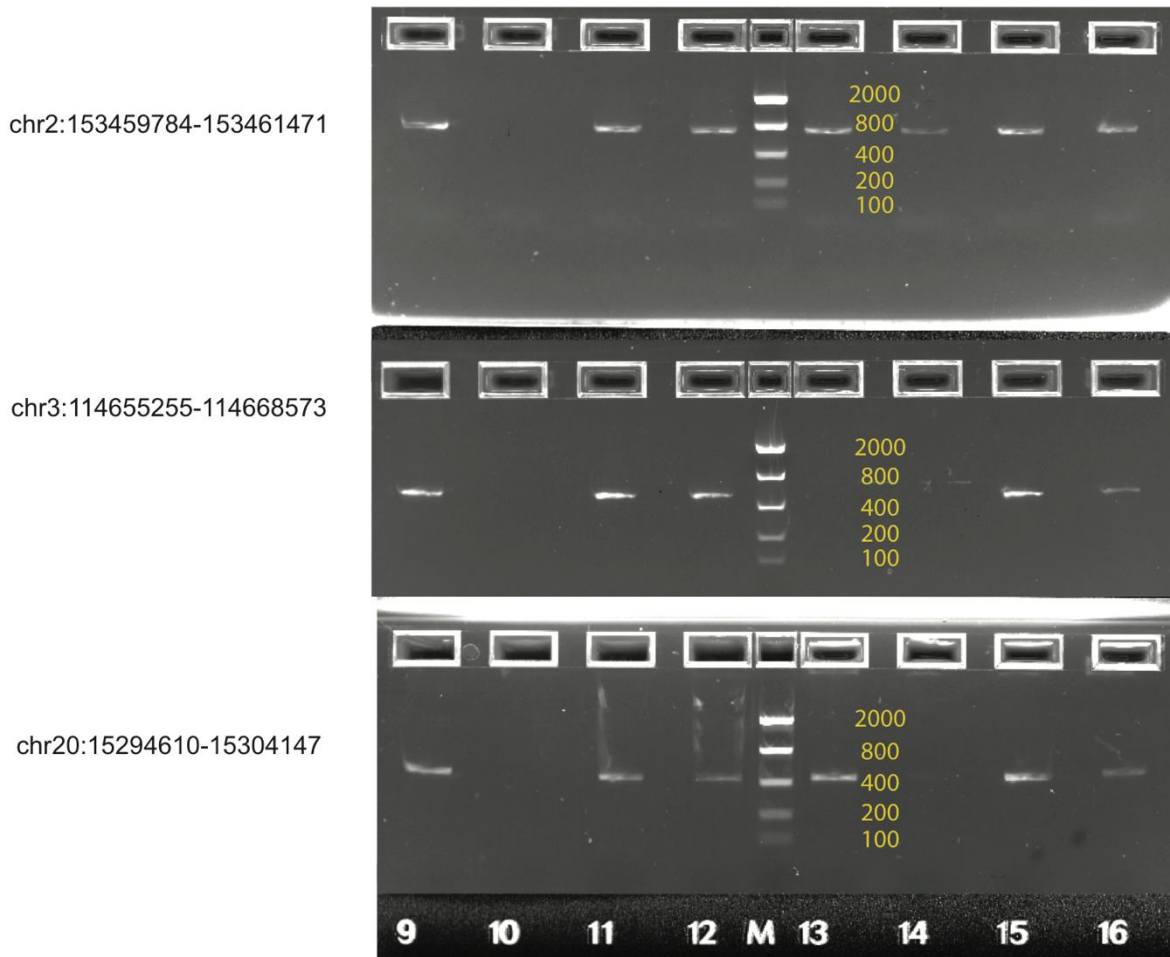

| Gel # | Sample  | DNA material | Location                           | chr2:153459784-153461471<br>deletion | chr3:114655255-114668573<br>deletion | chr20:15294610-15304147<br>deletion |
|-------|---------|--------------|------------------------------------|--------------------------------------|--------------------------------------|-------------------------------------|
| 9     | GM10539 | Cell line    | Bougainville                       | Yes                                  | Yes                                  | Yes                                 |
| 10    | UV0565  | Blood        | Nailik, North New Ireland AN       | No                                   | No                                   | No                                  |
| 11    | UV2196  | Blood        | Teop, North Bougainville           | Yes                                  | Yes                                  | Yes                                 |
| 12    | UV034   | Blood        | Baining (Marabu), East New Britain | Yes                                  | Yes                                  | Yes                                 |
| 13    | UV0726  | Blood        | Kuot (Kabil), New Ireland PAP      | Yes                                  | No                                   | Yes                                 |
| 14    | UV1023  | Blood        | Mamusi (Lingite), West New Britain | Yes                                  | No                                   | No                                  |
| 15    | UV2002  | Blood        | Tolai, East New Britain            | Yes                                  | Yes                                  | Yes                                 |
| 16    | UV001   | Blood        | Baining (Marabu), East New Britain | Yes                                  | Yes                                  | Yes                                 |

1149  
 1150 **Figure S33. PCR validation of additional three adaptive CNV candidates for one cell line and seven**  
 1151 **blood-derived Melanesian DNA samples.** For these CNVs, in the SGDP samples, one is the deletion  
 1152 variant (top panel) and two are multi-allelic CNVs (bottom two panels). Relevant selection statistics are  
 1153 reported in **Supplementary Table S9**. Note that most of Melanesian samples in the SGDP panel carry  
 1154 deletion alleles in all three loci, and thus our PCR experiments were designed so that PCR products are  
 1155 observed only if the deletion alleles are present. Ladder is at 2000 bp, 800 bp, 400 bp, 200 bp, and 100 bp.  
 1156 These PCR assays show 721, 519, and 438 bp products that is produced when the deletion alleles are  
 1157 present. Primers used in these assays are listed in **Supplementary Table S21**. The table at the bottom  
 1158 summarizes the results of our experiments. In all three cases, we confirm the presences of the deletion  
 1159 alleles in the cell line samples and several blood-derived DNA samples.  
 1160



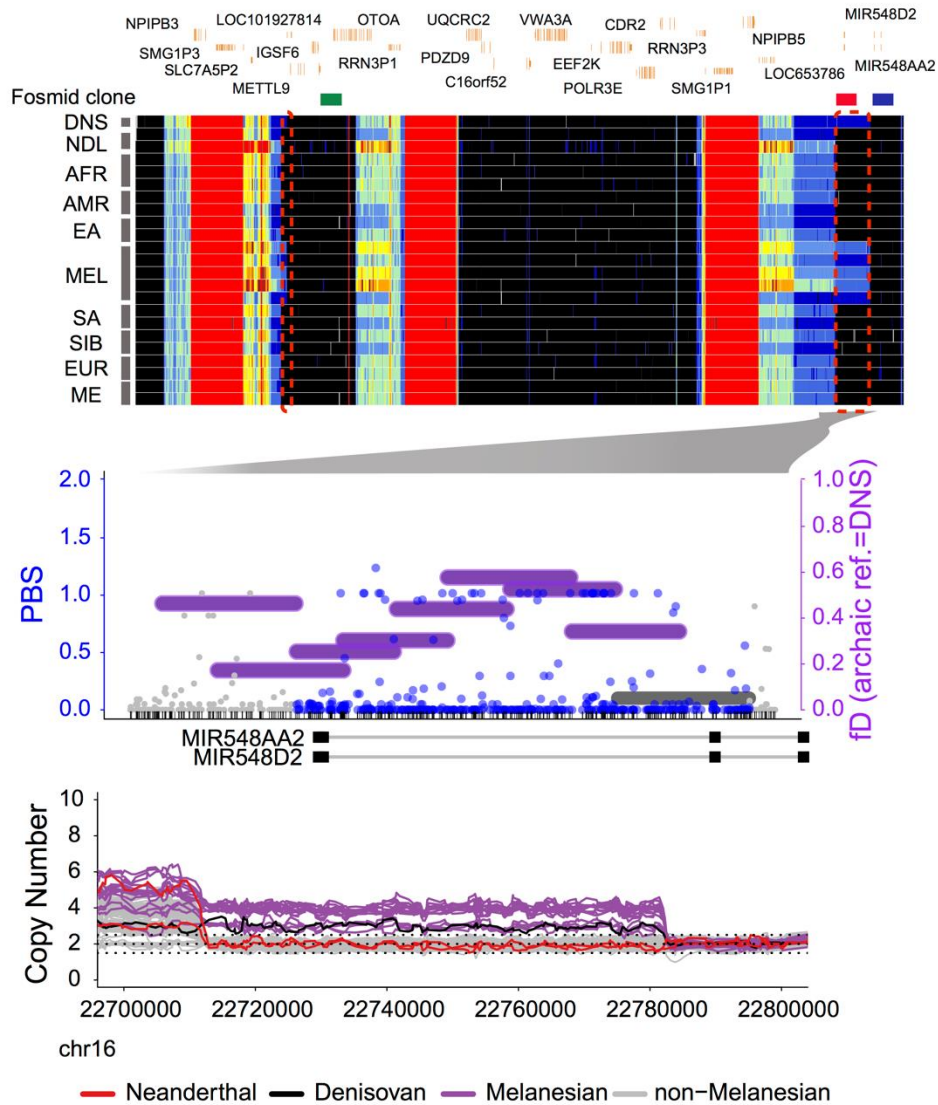

1161  
 1162 **Figure S34. Melanesian–Denisovan-specific duplication at chromosome 16p12.2.** Top: CN heat map  
 1163 for the chromosome 16p12.2 locus. Red dashed boxes indicate the 225 kbp Melanesian–Denisovan-  
 1164 specific duplication. Middle: The  $PBS$  (population branch statistic, left y-axis) for SNVs (dots) and  $f_D$   
 1165 (horizontal lines, representing windows of 100 SNVs, computed using Denisovan (DNS) as the archaic  
 1166 reference, right axis) at  $DUP_{16p12}$ . Colored dots (blue) and/or horizontal lines (purple) indicate significant  
 1167 test statistics ( $p < 0.05$ ). Bottom: CN line plot where the trajectory of each line shows CN variation for a  
 1168 given sample.  
 1169

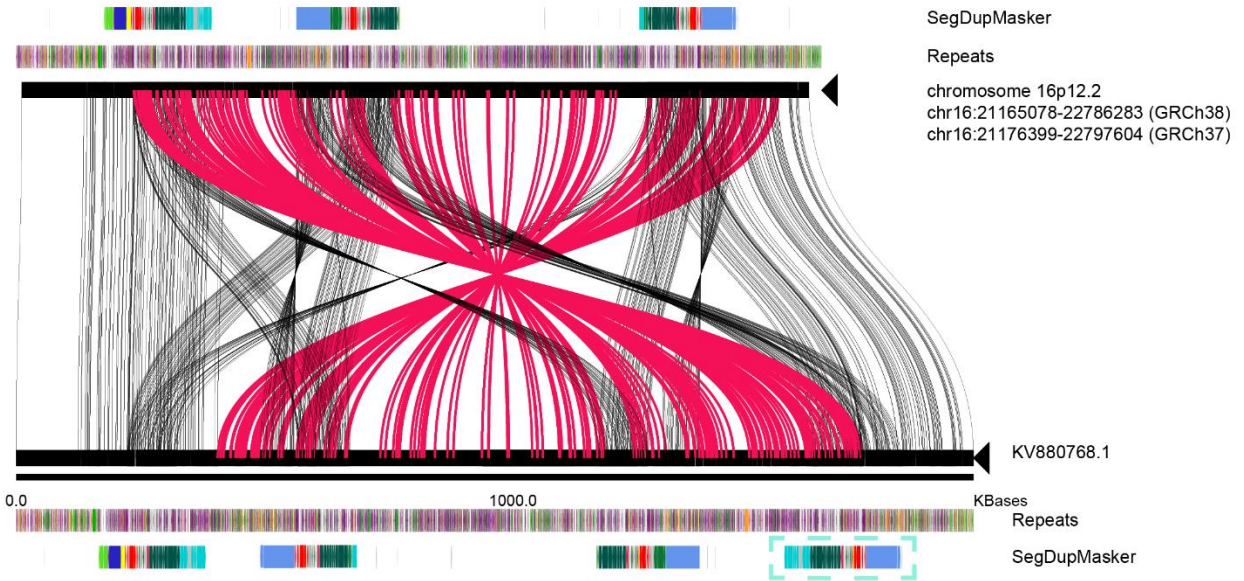

1170  
 1171  
 1172  
 1173  
 1174  
 1175  
 1176  
 1177

**Figure S35. Miroppeats analysis indicates genomic misassembly and misorientation at chromosome 16p12.2 in human reference (GRCh37 and GRCh38).** The patch contig (KV880768.1) was downloaded from NCBI (BioProject: PRJNA31257). Colored boxes are annotated human SDs and lines connecting the sequences show regions of homology. Red lines and light green dashed box indicate misassembled regions for 16p12.2 in the human reference.

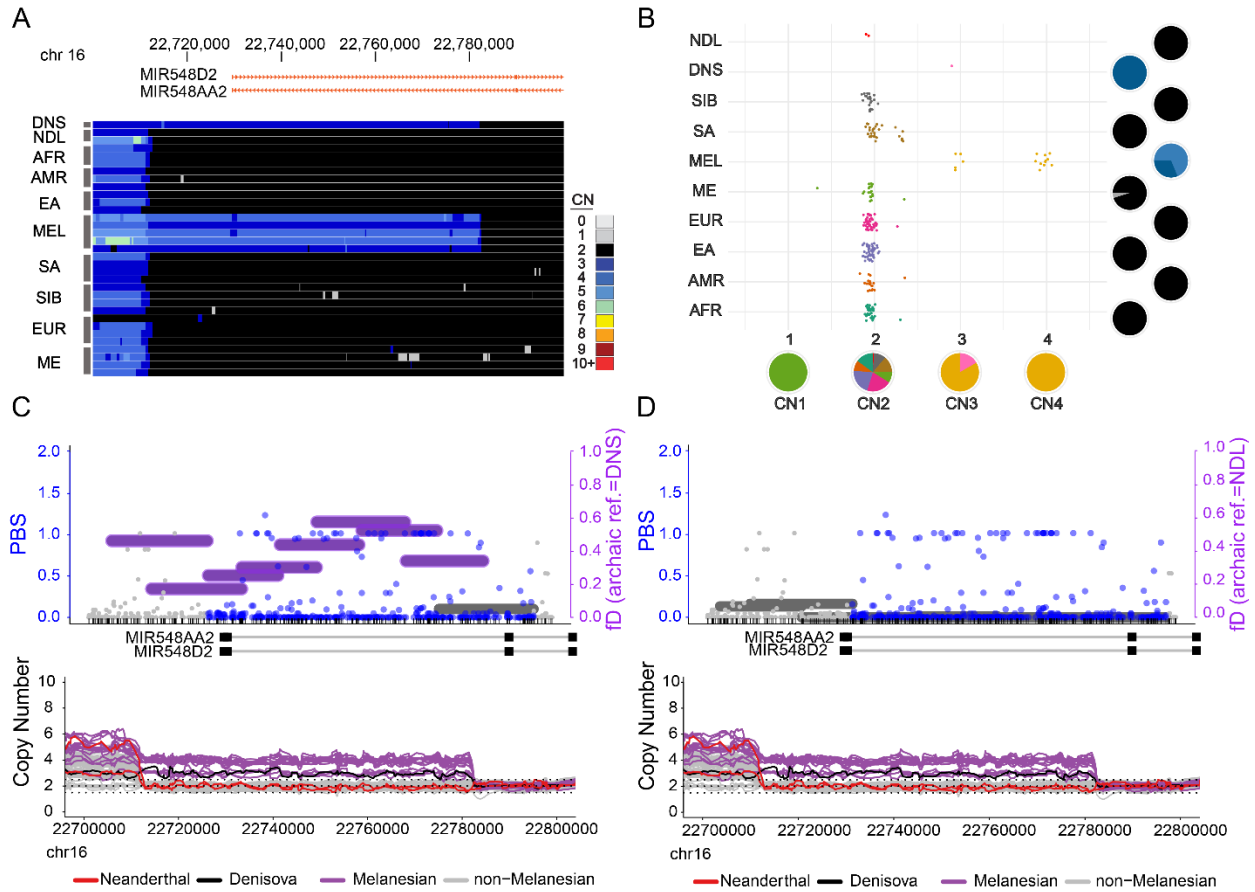

1178  
 1179  
 1180  
 1181  
 1182  
 1183  
 1184  
 1185  
 1186  
 1187  
 1188  
 1189  
 1190

**Figure S36. Evidence for Denisovan introgression at chromosome 16p12.2 duplication locus in Melanesians.** (A) CN heat map around the candidate region (DUP<sub>16p12</sub>, chr16:22,710,041-22,783,558, GRCh37) and (B) the distribution of WSSD-based CN estimates for the eight SGDP populations and the three archaic samples. (C and D) Significant signals of Denisovan introgression in the region shown in (A). Top panel: distributions of *PBS* (left y-axis), functional annotation (RefSeq and ENCODE elements; **Methods**) for all SNVs (dots), the  $f_D$  (horizontal bars, representing windows of 100 SNVs). Colored dots (blue) and horizontal bars (purple) indicate  $p$ -value < 0.05. Middle panel: genes (gray lines: noncoding sequences, black boxes: exons); bottom panel: the CN line plot, where the trajectory of each line shows the CN variation for a given sample across the region. These panels are aligned to subplot A. Note that introgression signals disappear when Neanderthals were used as the archaic reference in the  $f_D$  computation.

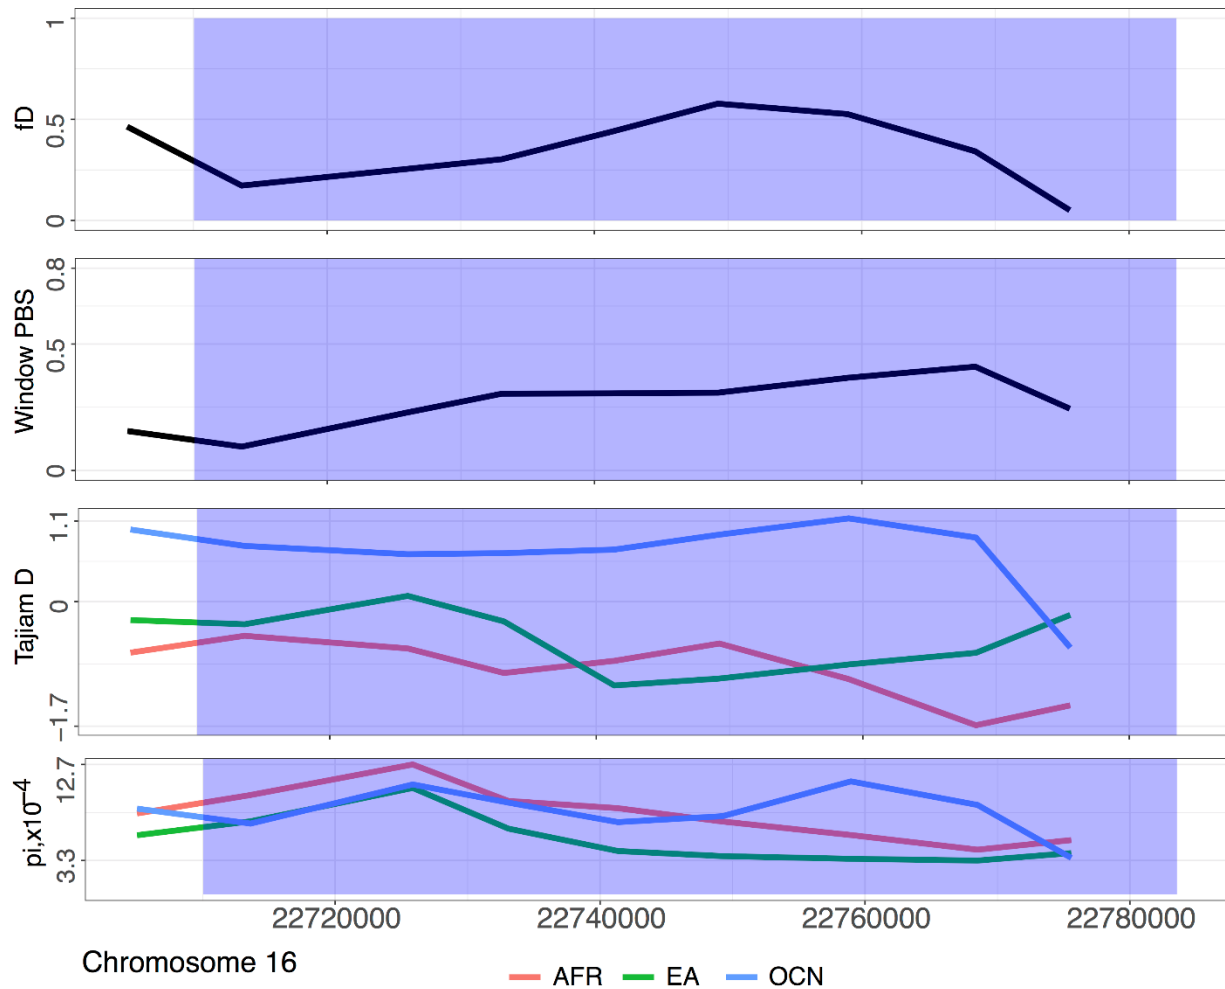

1191  
 1192  
 1193  
 1194  
 1195  
 1196

**Figure S37. Elevated Tajima's *D* values at the Melanesian–Denisovan-specific duplication at chromosome 16p12.2 (GRCh37).** Note that all statistics were calculated using windows of 100 SNVs across the region. For comparisons, statistics using AFR and EA samples were also plotted for both Tajima's *D* and *pi*. Purple shaded area indicates the region of interest.

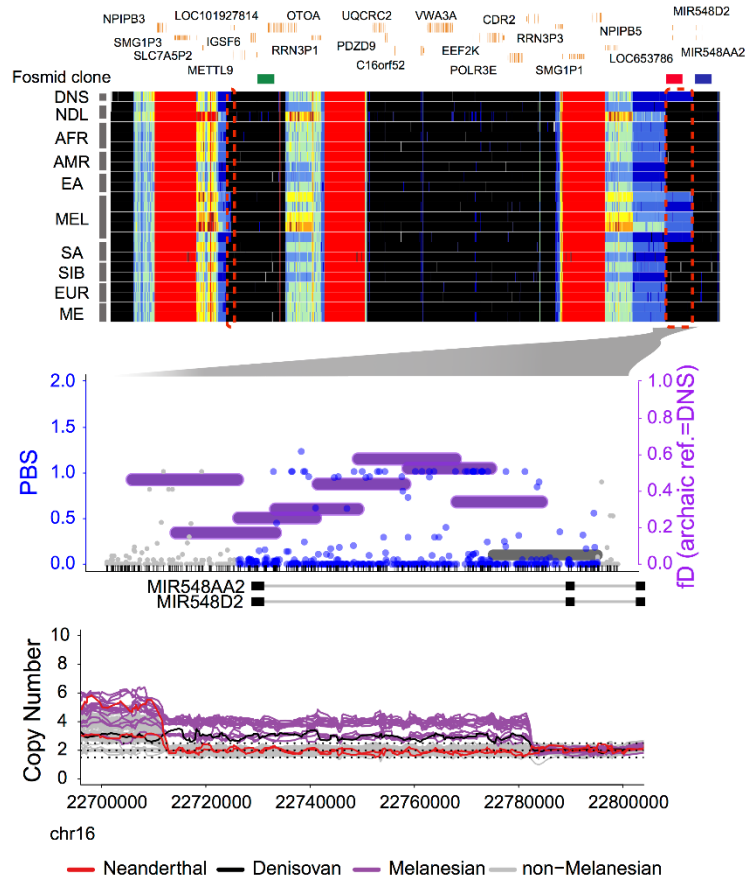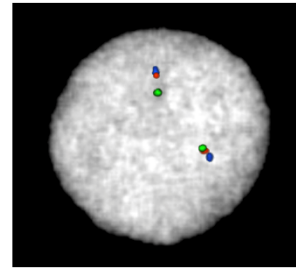

GM12878  
CN2

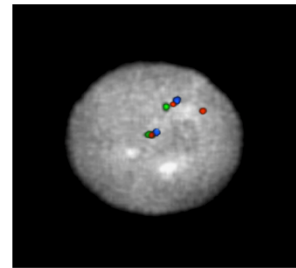

GM10541  
CN3

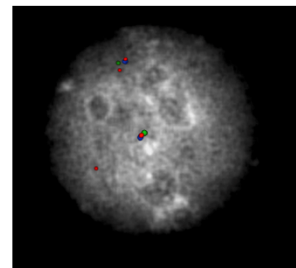

GM10543  
CN4

1197  
1198  
1199  
1200  
1201  
1202  
1203  
1204  
1205  
1206

**Figure S38. Testing for the presence of the chromosome 16p12.2 duplication in Melanesian cell lines.** The browser track shows the location of the selected fosmid probes (Table S13) with colors corresponding to those in the FISH images on the right. See Figure S34 for the detailed legends for the left panel. Right panel: FISH images show the presence or absence of an extra copy of the red fosmid clone (174222\_ABC10\_2\_1\_000044550500\_M3; Table S13), which represents the  $DUP_{16p12}$  sequence, in three cell lines (GM12878, GM10541, and GM10543). Details of the experiments can be found at the Materials and Methods section.

1207

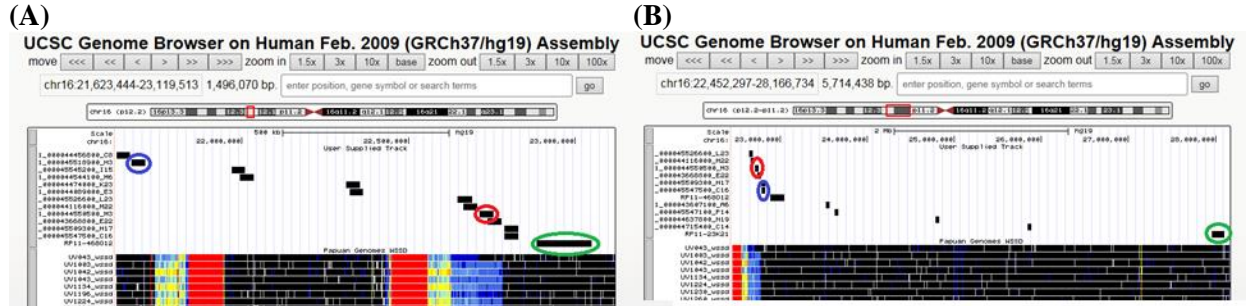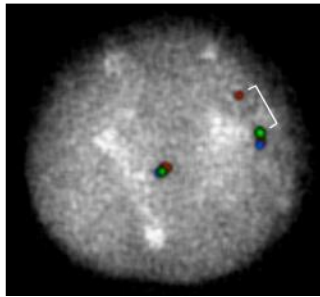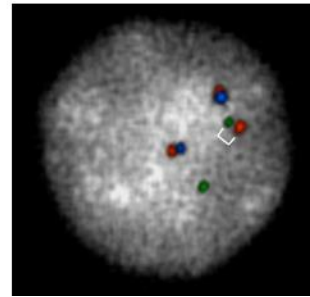

1208

1209

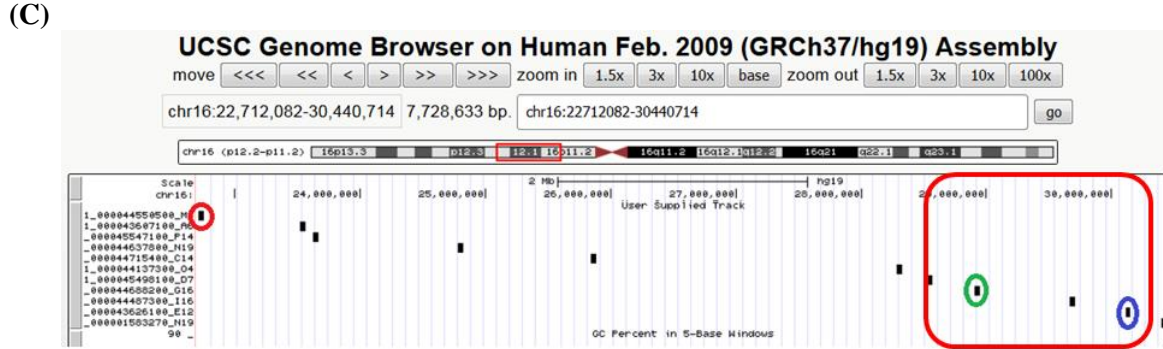

GM10541  
(3 copies)

GM10543  
(4 copies)

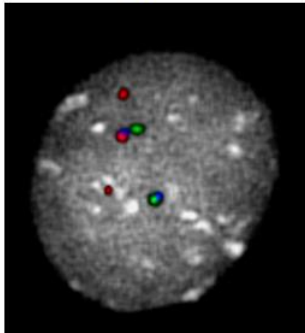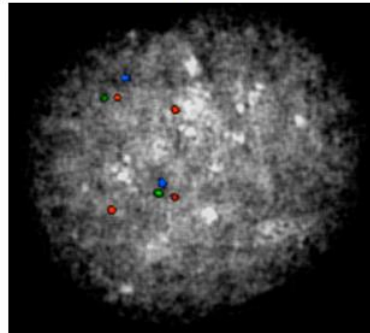

Probes  
 ABC10\_000044550500\_M3 c3 chr16:22713082-22754609  
 ABC10\_000043626100\_E12 c5 chr16:30.110.197-30.151.008  
 ABC10\_000044688200\_G16 fx chr16:28.907.099-28.949.923

1210

1211

1212

1213

1214

1215

1216

1217

1218

1219

**Figure S39. Identification of the putative integration site for the Melanesian–Denisovan-specific duplication using a series of FISH probes tiled along the short arm of chromosome 16. (A)** FISH test to place the duplicated copy using GM10541 (CN3). Using a distal fosmid clone (ABC10-45518900-H3, blue), we see the duplicated copy land in a proximal location compared to the green BAC (RP11-468O12). **(B)** FISH test with an adjacent fosmid (ABC10-45547500-C16, blue) and more proximal BAC (RP11-23K21, green) shows the extra red copy mapping proximal to the BAC. **(C)** FISH test with two fosmid within the 16p11.2 region (ABC10-44688200-G16, green and ABC10-43626100-E12, blue) shows the duplicated red fosmid mapping within these two fosmid probes, indicating the location of the duplication.

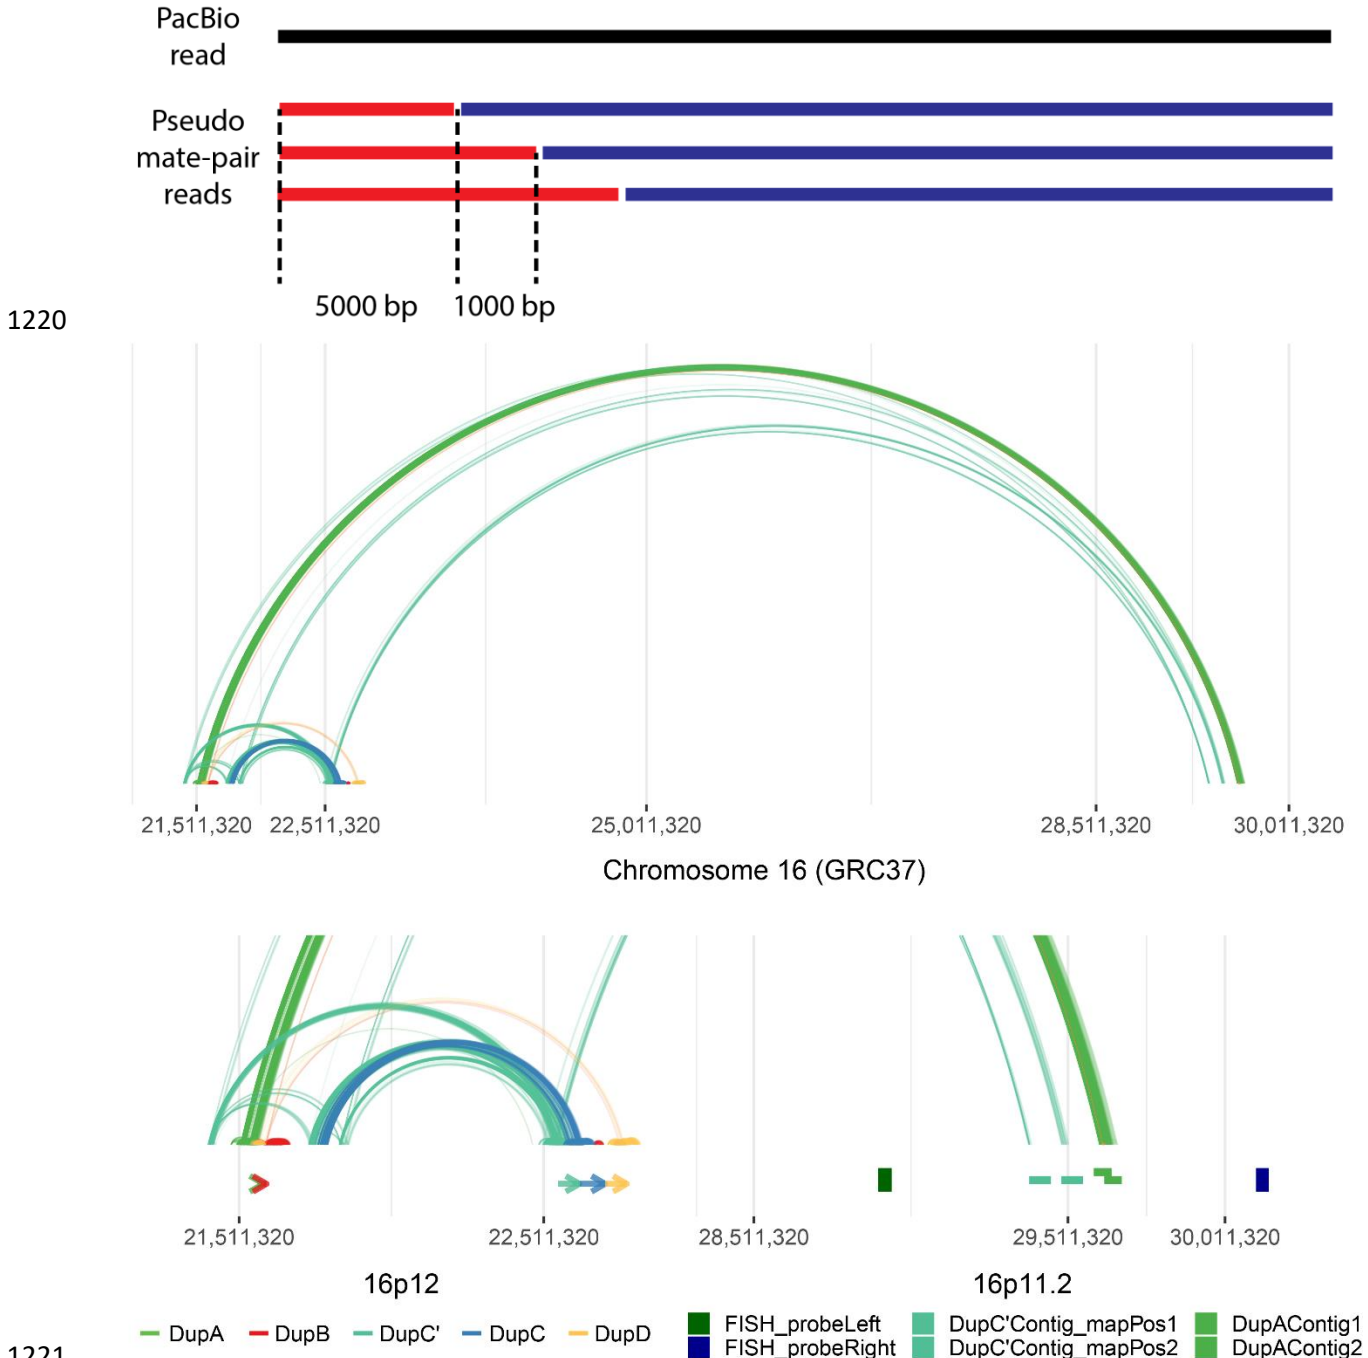

**Figure S40. Link-plot between chromosome 16p12.2 and 16p11.2 using pseudo mate-pair reads constructed from long-read data.** 75X long-read PacBio data of the chromosome 16p12.2 locus were generated for a Melanesian sample (HGDP00550), who is homozygous for the DUP<sub>16p12</sub> duplication variant. Top: We selected reads extending over duplication segment junctions, constructed mate-pair reads by slicing individual reads using a window of 5 kbp with a step size of 1 kbp, and mapped these pseudo mate-pair reads using BWA-MEM in default settings. Bottom: Each arch line represents the link between a mate-pair and its color indicate to which the duplication segment in 16p12.2, its mate, mapped. Contigs at the putative integration site on chromosome 16p11.2 were assembled using Canu and reads showing links between 16p12.2 and 16p11.2. Note that the contig DupC'Contig can be mapped to two locations (DupC'Contig\_mapPos1 and DupC'Contig\_mapPos2) within complex SDs in 16p11.2.

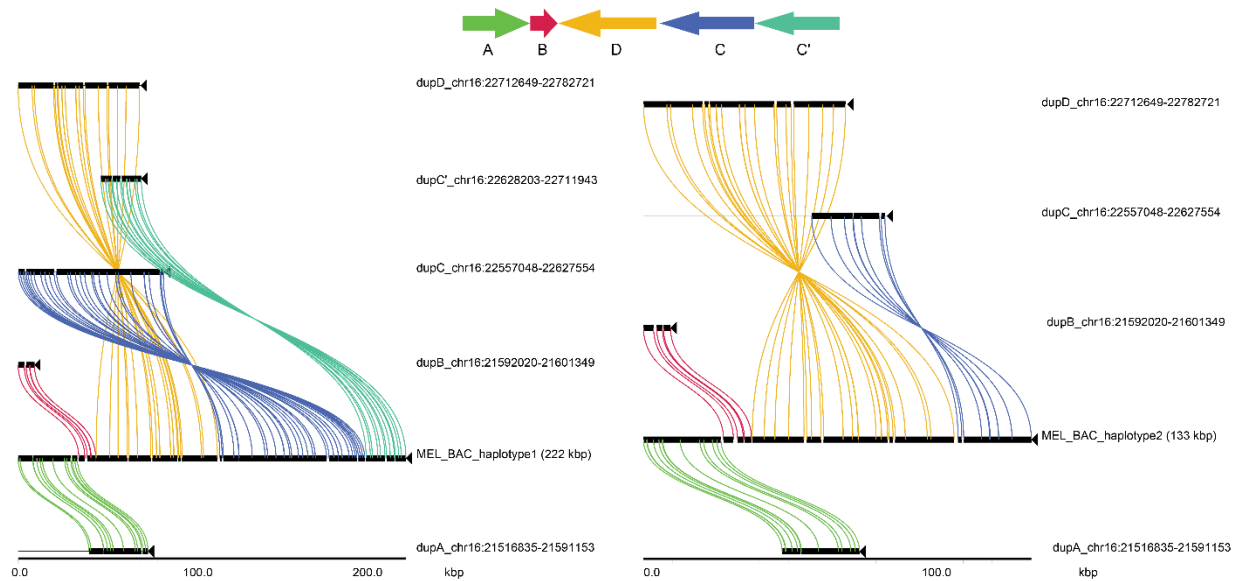

1232  
 1233  
 1234  
 1235  
 1236  
 1237  
 1238  
 1239

**Figure S41. Miropcats analysis of two sequence-resolved BAC haplotypes for DUP<sub>16p12</sub> against the five source sequences at the ancestral locus at 16p12.2 (GRCh37) as defined in (9).** Our analysis confirms the predicted duplication structure (arrows, top panel) proposed in (9). BAC sequences for DUP<sub>16p12</sub> from a Melanesian large-insert BAC library (GM10539) were generated using PacBio long-read sequencing technology.



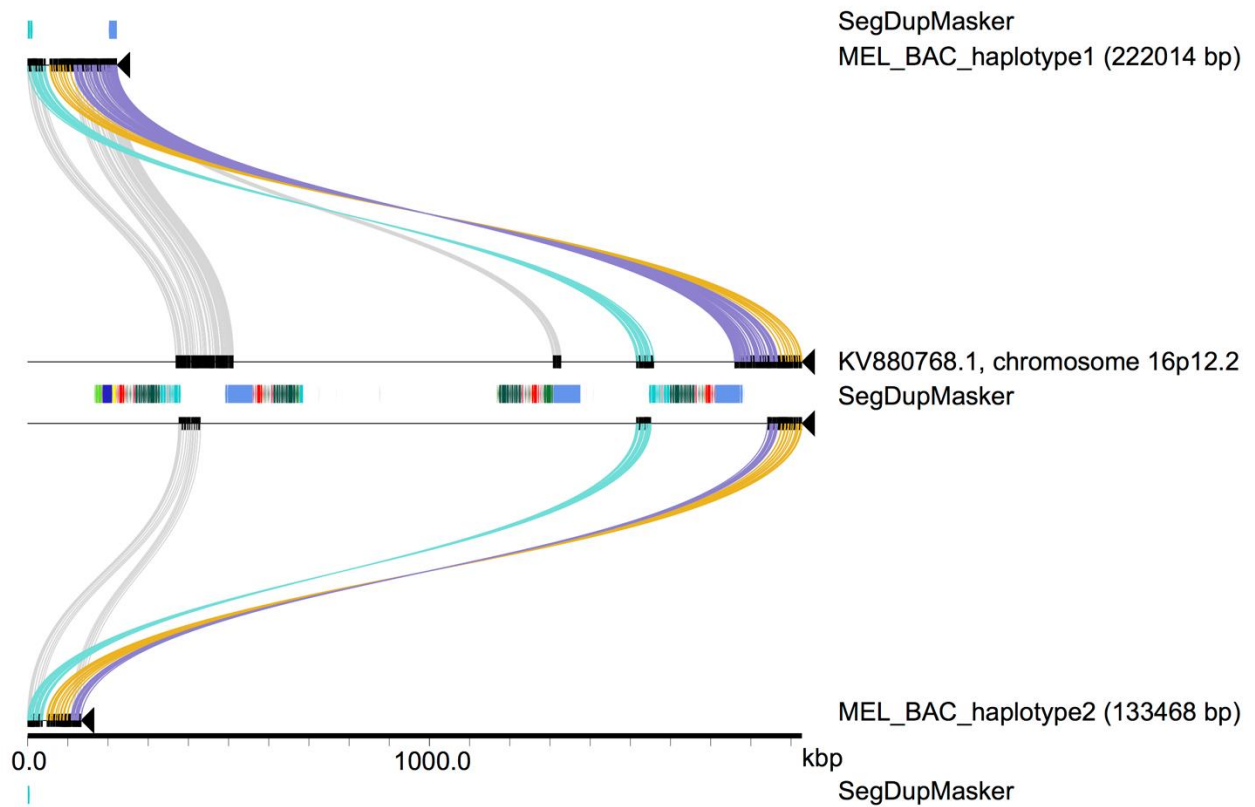

1240  
1241  
1242  
1243  
1244  
1245

**Figure S42. Miroppeats analysis of two sequence-resolved  $DUP_{16p12}$  BAC haplotypes against the 16p12.2 patch contig (KV880768.1) (39).** Colored boxes are annotated human SDs and lines connecting the sequences show regions of homology. Colored lines indicate regions corresponding to the  $DUP_{16p12}$  duplication sequence.

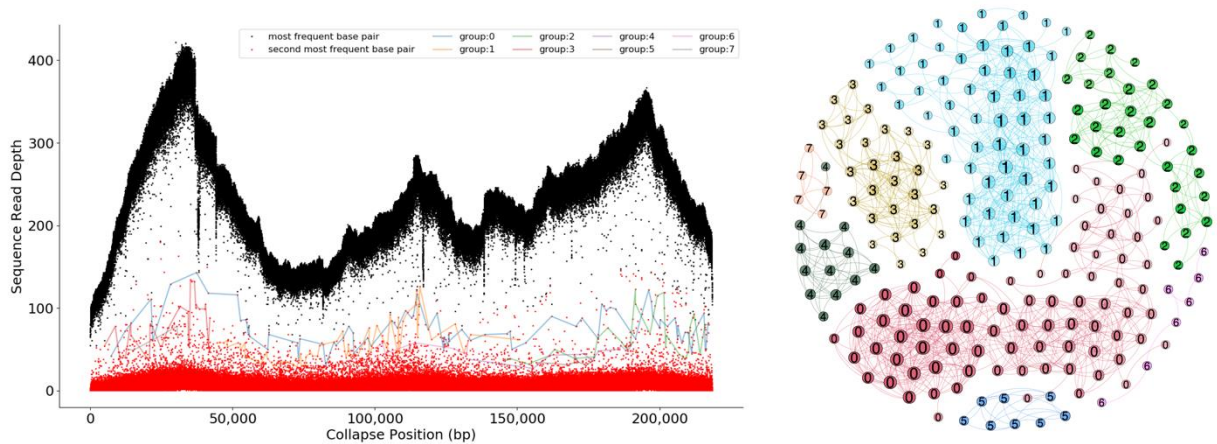

1246  
 1247 **Figure S43. Segmental Duplication Assembler (SDA) constructing the Melanesian DUP<sub>16p12</sub> contig**  
 1248 ***ab initio* using the 222 kbp BAC contig as its initial seed.** In short, SDA explores and clusters PacBio  
 1249 reads that shared the same PSVs and performs local *de novo* sequence assembly for each cluster of reads.  
 1250 The left panel shows the read-depth profiling of the first run of the SDA iterations using the 222 kbp BAC  
 1251 haplotype as a seed to extract reads corresponding to the DUP<sub>16p12</sub> duplication variant in the PacBio long-  
 1252 read genome. A contig of 252 kbp was built using reads from group:0 (blue line in the left panel; the red  
 1253 cluster on the right panel).  
 1254

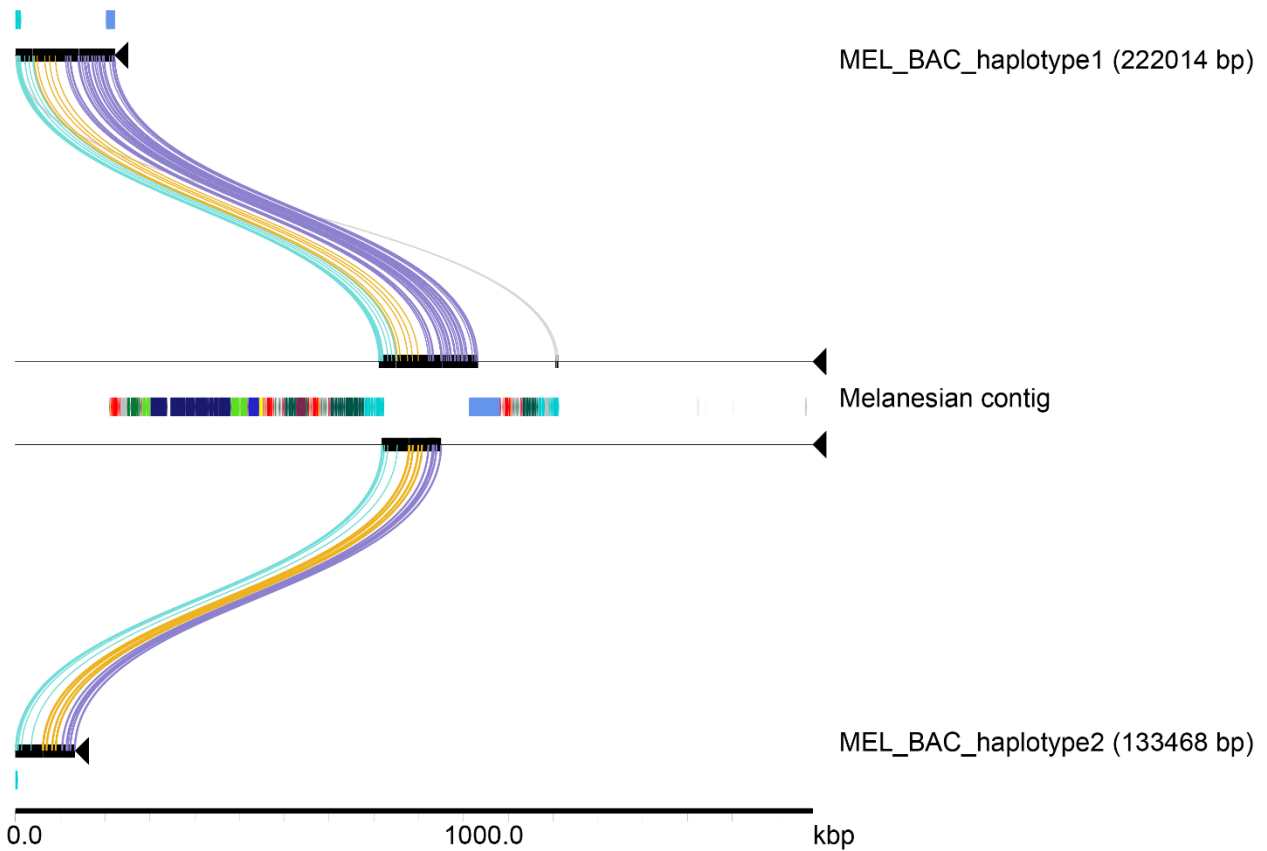

1255  
1256  
1257  
1258  
1259  
1260  
1261  
1262  
1263

**Figure S44. Miroppeats analysis of two sequence-resolved  $DUP_{16p12}$  BAC haplotypes against the long-read assembled Melanesian contig by SDA (41).** Colored boxes are annotated human SDs and lines connecting the sequences show regions of homology. Colored lines indicate regions corresponding to the  $DUP_{16p12}$  duplication sequence. The sequence accuracy of the Melanesian SDA contig is 99.86% using the 222 kbp BAC haplotype as the baseline. Note that the BAC (GM10539) and the genome (HGDP00550) were sequenced from two unrelated Melanesian individuals.

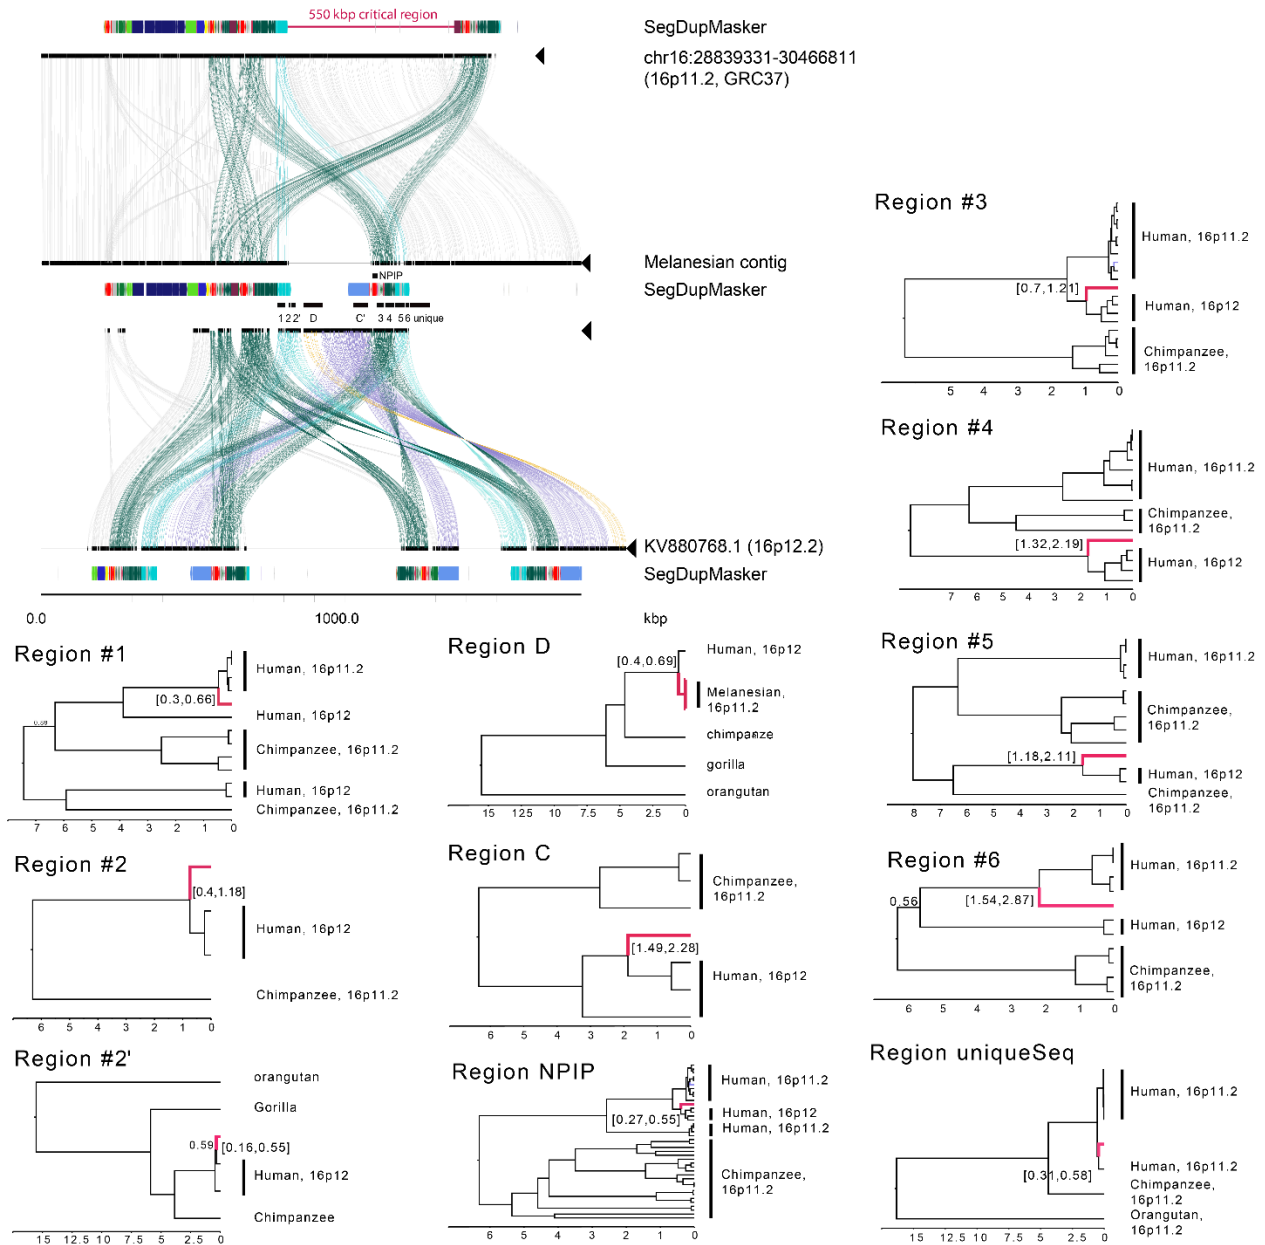

1264  
1265  
1266  
1267  
1268  
1269  
1270  
1271  
1272  
1273  
1274  
1275  
1276  
1277

**Figure S45. Phylogenetic reconstruction of the evolutionary history for  $DUP_{16p12}$ .** Phylogenetic inferences were based on 11 regions sampled along the inserted  $DUP_{16p12}$  sequence at 16p11.2 (black boxes) along with homologous sequences from human ( $n=4$ ), chimpanzee ( $n=2$ ), and orangutan ( $n=2$ ) BAC sequences for the 16p11.2 locus as well as from the 16p12.2 ancestral locus (KV880768.1). Phylogeny was inferred using BEAST (v.2.5.0) and five independent runs of 10 million iterations of Markov Chain Monte Carlo (**Methods**). Red branches indicate the lineages corresponding to the Melanesian  $DUP_{16p12}$  variant. The numbers within brackets show the 95% highest posterior density interval for the divergence (in Mya) between the Melanesian  $DUP_{16p12}$  variant and its closest related sequences (**Table S15**). Overall posterior branch supports are  $>99\%$  unless otherwise labeled. Note that the homologous sequence from the 222 kbp  $DUP_{16p12}$  BAC haplotype 1 were also included in the analysis of Region D.

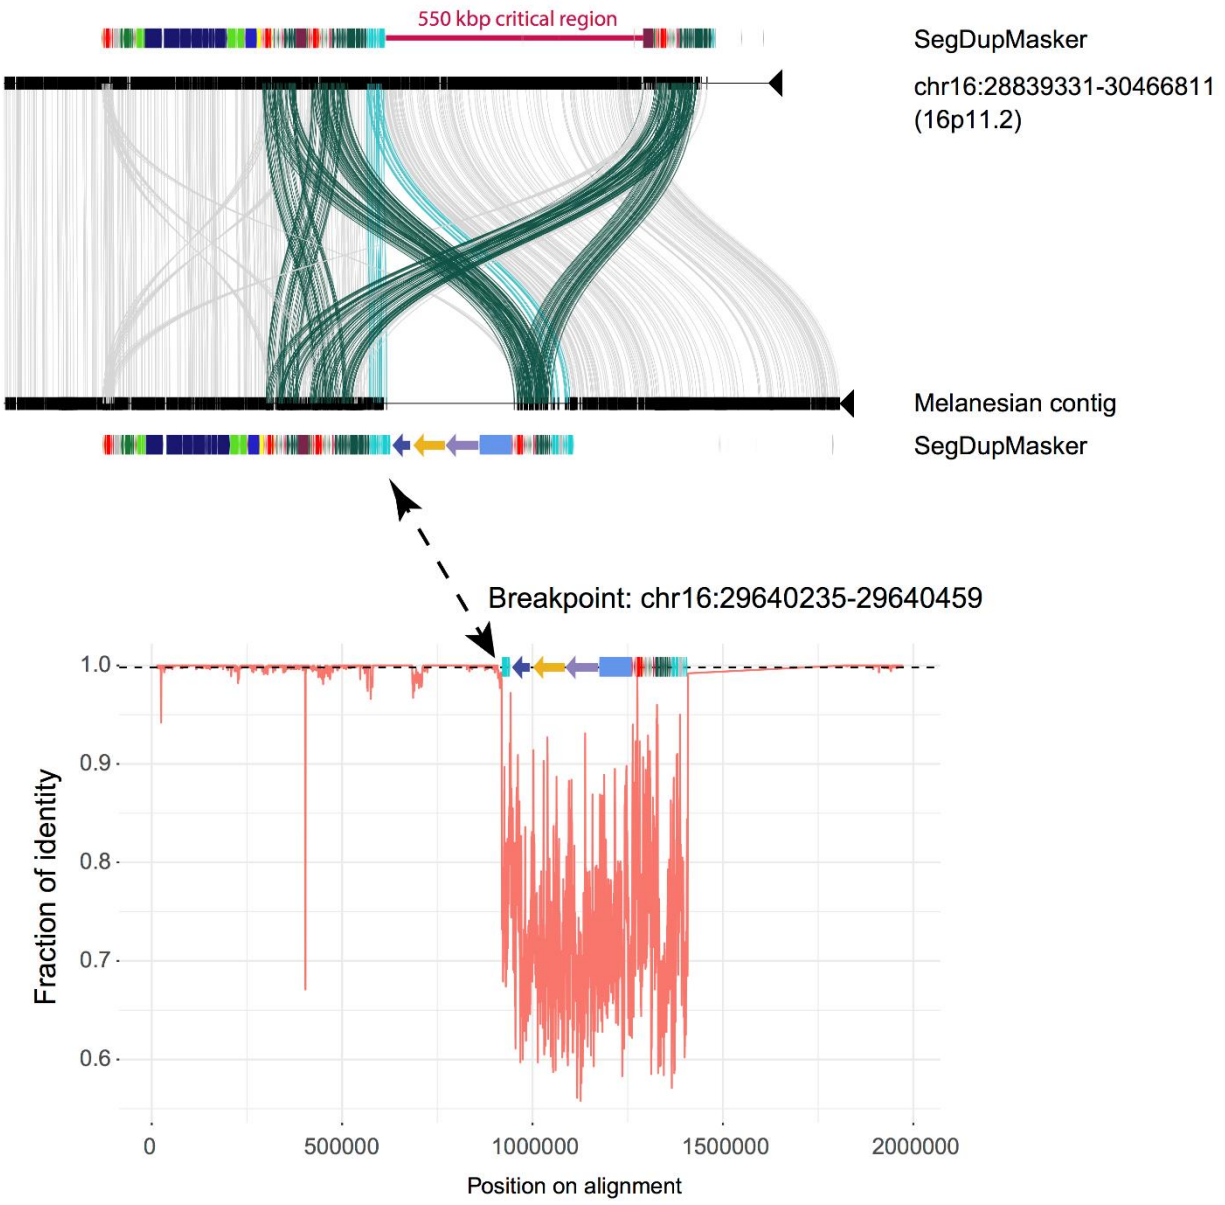

1278  
1279  
1280  
1281  
1282  
1283

**Figure S46. A 1.8 Mbp sequence-resolved Melanesian DUP<sub>16p12</sub> contig.** Miropeats analysis (top) shows a ~383 kbp insertion in the Melanesian contig with respect to the human reference GRCh37. Pairwise sequence alignment analysis using a window of 1000 bp and sliding by 100 bp (bottom) show the location of the insertion. We inferred the breakpoint of the insertion at chr16:29640235-29640459.

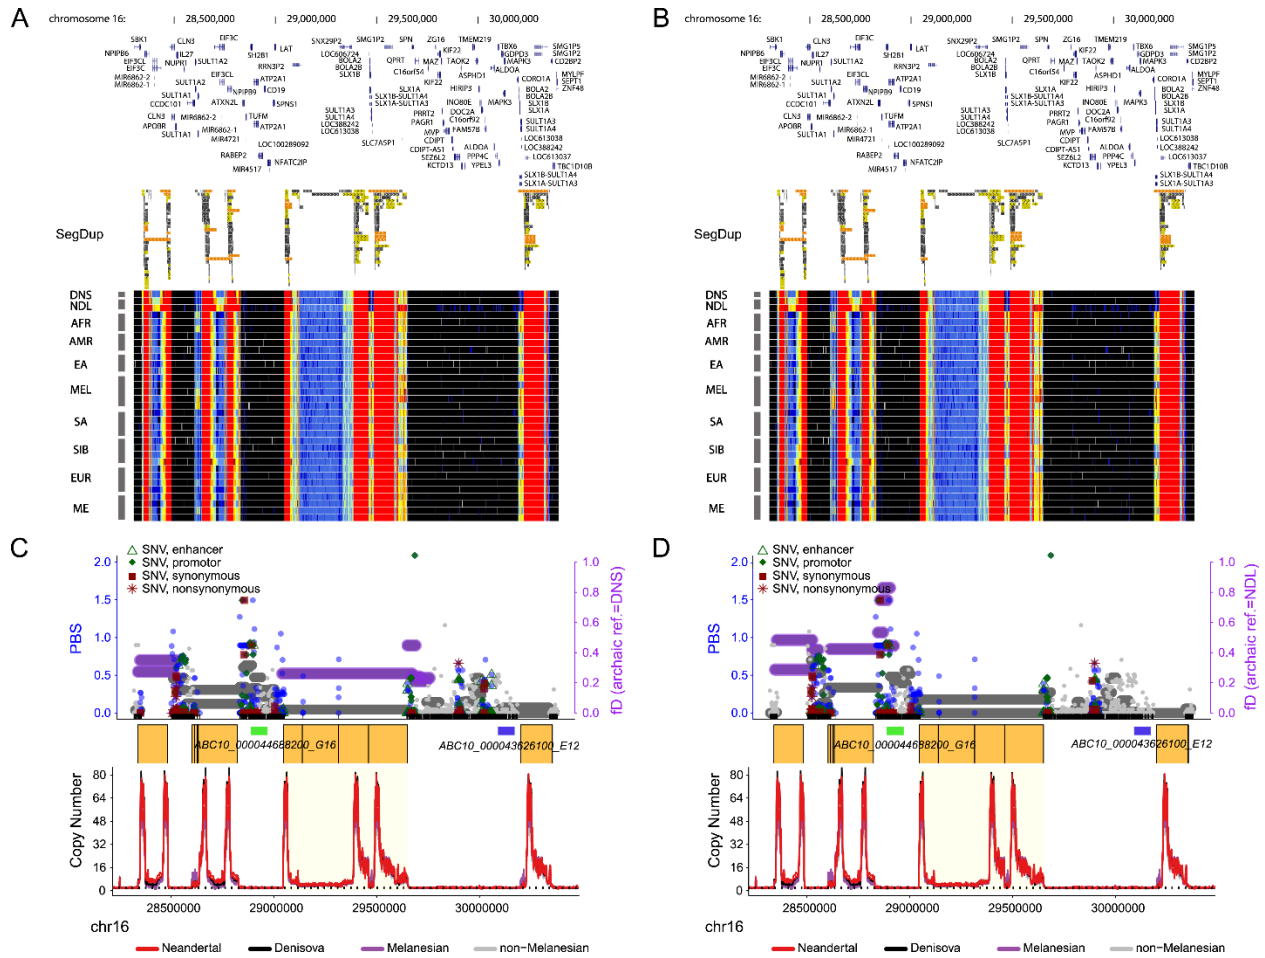

1284  
 1285  
 1286  
 1287  
 1288  
 1289  
 1290  
 1291  
 1292  
 1293  
 1294  
 1295  
 1296  
 1297  
 1298

**Figure S47. Adaptive introgression signals at chromosome 16p11.2, the putative location of the Melanesian-specific duplication DUP<sub>16p12</sub>.** (A and B) CN heat map around the chromosome 16p11.2 region. (C and D) Distributions of significant signals of both selection and archaic introgression, where top panels: distributions of *PBS* (left y-axis), functional annotation (RefSeq and ENCODE elements; **Methods**) for all SNVs (dots), the *f<sub>D</sub>* (horizontal bars, representing windows of 100 SNVs). Note that the archaic references used in the *f<sub>D</sub>* test in C and D are Denisovan (DNS) and Neanderthal (NDL), respectively. Colored dots (blue) and horizontal bars (purple) indicate *p*-value < 0.05. Middle panel: SDs (orange) and two fosmid probes (green and blue) used to locate the putative location of the DUP<sub>16p12</sub> (**Figure S34**); bottom panel: the CN line plot, where the trajectory of each line shows the CN variation across the region for a given sample. These panels are aligned to subplots A and B above. Note that introgression signals disappear when Neanderthals were used as the archaic reference in the *f<sub>D</sub>* computation.

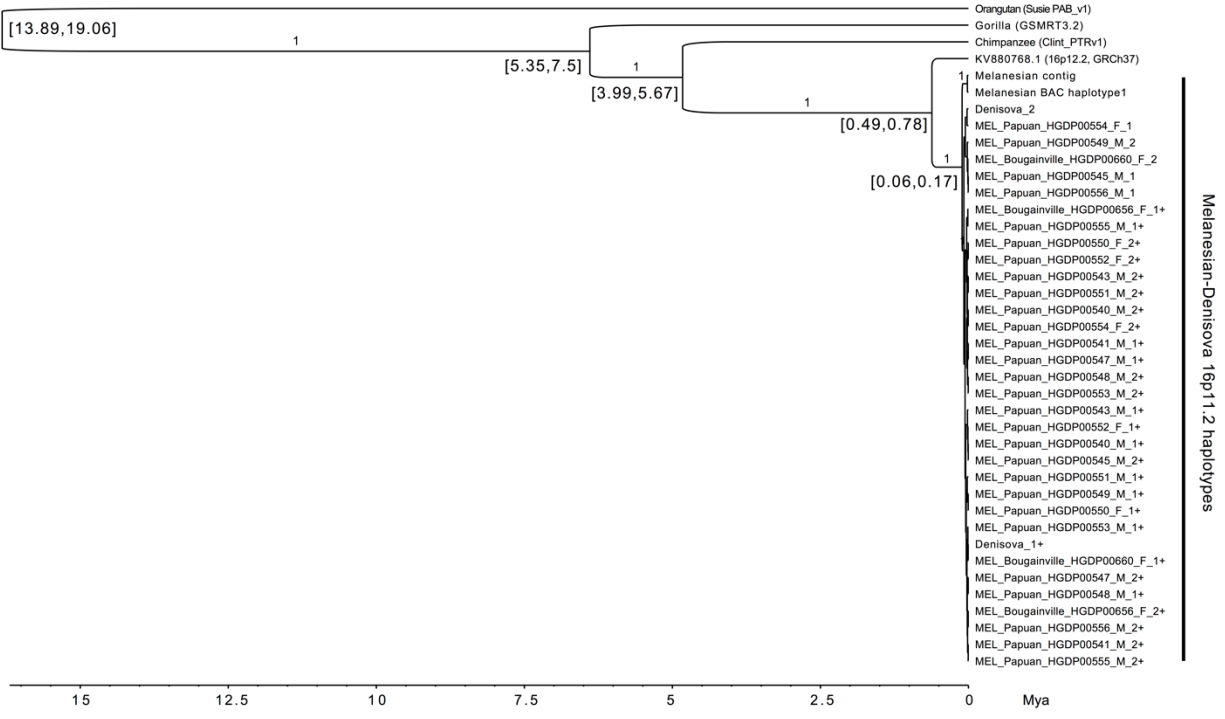

1299  
 1300  
 1301  
 1302  
 1303  
 1304  
 1305  
 1306  
 1307  
 1308  
 1309  
 1310  
 1311  
 1312

**Figure S48. Evidence for supporting Denisovan introgression of the DUP<sub>16p12</sub> duplication polymorphism in Melanesians.** The Melanesian–Denisovan 16p11.2 haplotypes were based on variants from ~9 kbp, where >5 Denisovan reads were confidently aligned at positions between 865,000 and 927,000 on the assembled Melanesian contig. Eight SNVs were called using FreeBayes (v1.0.2) and Illumina short-read data that were confidently mapped to the assembled Melanesian 16p11.2 contig. BEAGLE (v4.1) was used to phase the eight SNVs along with a bi-allelic duplication variant for the Melanesian–Denisovan DUP<sub>16p12</sub> duplication polymorphism. Sequences for the nonhuman great apes were based on the mapping of sequences with Denisovan coverage to published assemblies (53). BEAST (v2.5.0) was used to infer the phylogeny, the 95% high-probability density for the divergence (brackets), and the posterior supports (the numbers above the branches). A plus (+) sign at a given sample ID indicates the presence of the DUP<sub>16p12</sub> duplication allele.

Branch site model of positive selection for Melanesian *NPIP16*  
P-value(likelihood ratio test) =  $2.68 \times 10^{-57}$

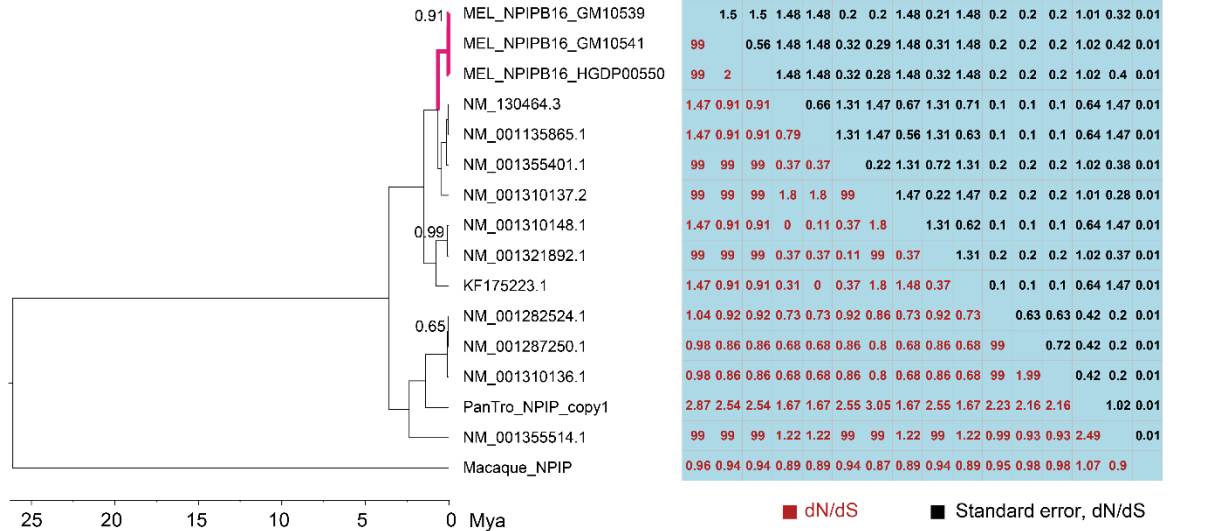

1313  
1314  
1315  
1316  
1317  
1318  
1319  
1320  
1321  
1322  
1323  
1324  
1325  
1326

**Figure S49. Phylogenetic analyses reveals positively selected amino acid substitutions at the Melanesian *NPIP16* lineage.** Two Melanesian *NPIP16* FLNC transcripts (GM10539 and GM10541) were generated using PacBio IsoSeq technology. A third *NPIP16* transcript was identified based on mapping in the assembled Melanesian contig (HGDP00550). Human *NPIP16* and *rhesus macaque* (XM\_015125675.1) gene sequences were downloaded from RefSeq (release 109), while the chimpanzee (PanTro) *NPIP* copy was based on the chimpanzee BAC contigs from (15). Branch site tests of positive selection and pairwise *dN/dS* ratios were computed using PAML (v14.9). Standard errors of pairwise *dN/dS* were calculated using 1,000 bootstrap samples. Significance test of the branch site model was based on a chi-squared likelihood ratio test (d.f. = 1) against the null model of neutral evolution. Phylogeny of these *NPIP16* sequences was inferred using BEAST (v2.5.0). Note that the posterior probabilities for branch supports are all equal to 1.0, except for those shown.



Alternative model  
 Branch-specific  $dN/dS$   
 LogLik:-9152  
 #parameters= 59  
 LRT  $p=0.017$

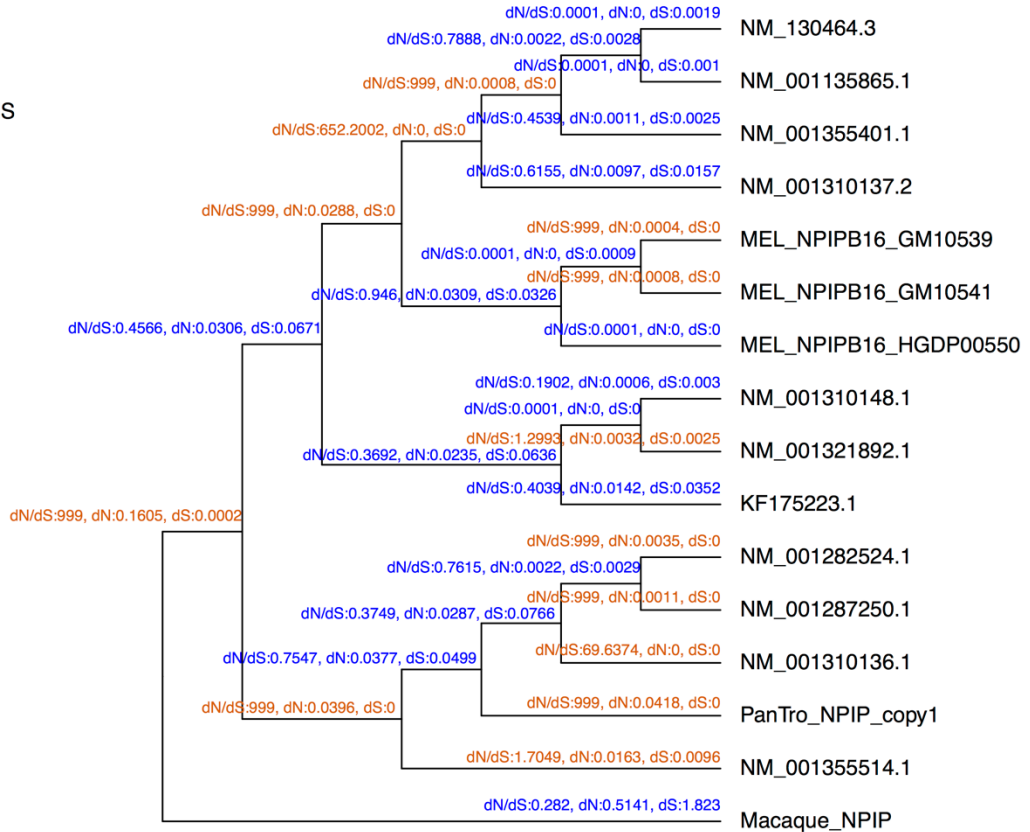

1327  
 1328  
 1329  
 1330  
 1331  
 1332  
 1333  
 1334  
 1335  
 1336

**Figure S50. Cladogram of the *NPIP* lineages showing  $dN$  and  $dS$  values and  $dN/dS$  ratios for individual branches.** The same *NPIP* sequences as in **Figure S49** were used to estimate the branch-specific  $dN/dS$ ,  $dN$ , and  $dS$  values, shown above each branch, using PAML (v14.9). Orange and blue colors indicate if the test of  $dN/dS$  ratio  $\geq 1$  is significant ( $p < 0.05$ ) or not ( $p \geq 0.05$ ), respectively. A significance test of the free  $dN/dS$  ratios model was based on a chi-squared likelihood ratio test (d.f. = 1) against the null model of neutral evolution ( $dN/dS = 1$ ). The phylogeny of these *NPIP* sequences (**Figure S49**, left panel) was inferred using BEAST (v2.5.0). Note that PAML reports  $dN/dS = 99$  or  $999$  for a branch when no synonymous mutation was inferred ( $dS = 0$ ) along the lineage.

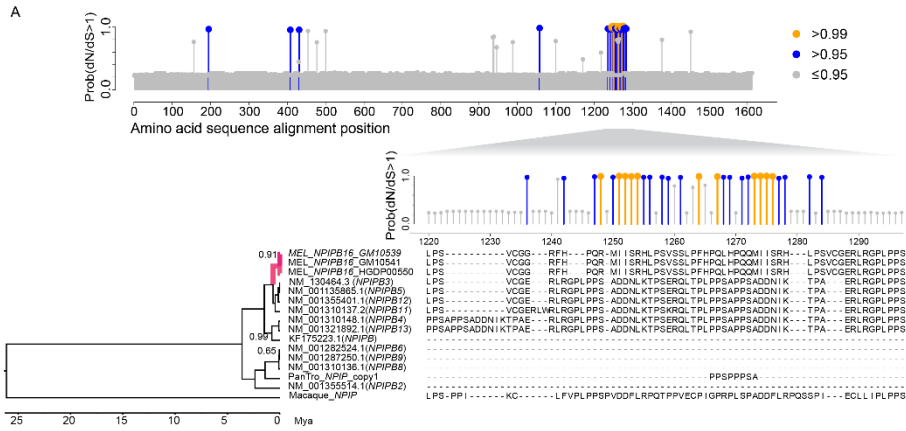

**B. Hypothesized codon sequences among NPIP16 and its close relatives before two indel events**

|                      |             |                 |                             |
|----------------------|-------------|-----------------|-----------------------------|
| MEL_NPIP16_GM10539   | CTG CCG AGC | GTC TGC GGG GAG | CGT CTG CCG GGG CCG CTT CCA |
| MEL_NPIP16_GM10541   | CTG CCG AGC | GTC TGC GGG GAG | CGT CTG CCG GGG CCG CTT CCA |
| MEL_NPIP16_HGDP00550 | CTG CCG AGC | GTC TGC GGG GAG | CGT CTG CCG GGG CCG CTT CCA |
| NN_130464.3          | CTG CCG AGC | GTC TGC GGG GAG | CGT CTG CCG GGG CCG CTT CCA |
| NM_001135865.1       | CTG CCG AGC | GTC TGC GGG GAG | CGT CTG CCG GGG CCG CTT CCA |
| NK_001355401.1       | CTG CCG AGC | GTC TGC GGG GAG | CGT CTG CCG GGG CCG CTT CCA |
| NM_001310137.2       | CTG CCG AGC | GTC TGC GGG GAG | CGT CTG CCG GGG CCG CTT CCA |
| NM_001310148.1       | CTG CCG AGC | GTC TGC GGG GAG | CGT CTG CCG GGG CCG CTT CCA |
| NK_001321892.1       | CTG CCG AGC | GTC TGC GGG GAG | CGT CTG CCG GGG CCG CTT CCA |

  

|                      |         |                                                                                                 |
|----------------------|---------|-------------------------------------------------------------------------------------------------|
| MEL_NPIP16_GM10539   | CCC TCA | GCG GAT GAT AAT CTC AAG ACA CCT TCC GAG CGT CAG CTC ACT CCC CTT CCA CCG TCA GCT CCA CCC TCA GCA |
| MEL_NPIP16_GM10541   | CCC TCA | GCG GAT GAT AAT CTC AAG ACA CCT TCC GAG CGT CAG CTC ACT CCC CTT CCA CCG TCA GCT CCA CCC TCA GCA |
| MEL_NPIP16_HGDP00550 | CCC TCA | GCG GAT GAT AAT CTC AAG ACA CCT TCC GAG CGT CAG CTC ACT CCC CTT CCA CCG TCA GCT CCA CCC TCA GCA |
| NN_130464.3          | CCC TCA | GCG GAT GAT AAT CTC AAG ACA CCT TCC GAG CGT CAG CTC ACT CCC CTT CCA CCG TCA GCT CCA CCC TCA GCA |
| NM_001135865.1       | CCC TCA | GCG GAT GAT AAT CTC AAG ACA CCT TCC GAG CGT CAG CTC ACT CCC CTT CCA CCG TCA GCT CCA CCC TCA GCA |
| NM_001355401.1       | CCC TCA | GCG GAT GAT AAT CTC AAG ACA CCT TCC GAG CGT CAG CTC ACT CCC CTT CCA CCG TCA GCT CCA CCC TCA GCA |
| NM_001310137.2       | CCC TCA | GCG GAT GAT AAT CTC AAG ACA CCT TCC GAG CGT CAG CTC ACT CCC CTT CCA CCG TCA GCT CCA CCC TCA GCA |
| NM_001310148.1       | CCC TCA | GCG GAT GAT AAT CTC AAG ACA CCT TCC GAG CGT CAG CTC ACT CCC CTT CCA CCG TCA GCT CCA CCC TCA GCA |
| NK_001321892.1       | CCC TCA | GCG GAT GAT AAT CTC AAG ACA CCT TCC GAG CGT CAG CTC ACT CCC CTT CCA CCG TCA GCT CCA CCC TCA GCA |

  

|                      |                                 |                                         |
|----------------------|---------------------------------|-----------------------------------------|
| MEL_NPIP16_GM10539   | GAT GAT AAT ATC AAG ACA CCT GCC | GAG CGT CTG CCG GGG CCG CTT CCA CCC TCA |
| MEL_NPIP16_GM10541   | GAT GAT AAT ATC AAG ACA CCT GCC | GAG CGT CTG CCG GGG CCG CTT CCA CCC TCA |
| MEL_NPIP16_HGDP00550 | GAT GAT AAT ATC AAG ACA CCT GCC | GAG CGT CTG CCG GGG CCG CTT CCA CCC TCA |
| NN_130464.3          | GAT GAT AAT ATC AAG ACA CCT GCC | GAG CGT CTG CCG GGG CCG CTT CCA CCC TCA |
| NM_001135865.1       | GAT GAT AAT ATC AAG ACA CCT GCC | GAG CGT CTG CCG GGG CCG CTT CCA CCC TCA |
| NM_001355401.1       | GAT GAT AAT ATC AAG ACA CCT GCC | GAG CGT CTG CCG GGG CCG CTT CCA CCC TCA |
| NM_001310137.2       | GAT GAT AAT ATC AAG ACA CCT GCC | GAG CGT CTG CCG GGG CCG CTT CCA CCC TCA |
| NM_001310148.1       | GAT GAT AAT ATC AAG ACA CCT GCC | GAG CGT CTG CCG GGG CCG CTT CCA CCC TCA |
| NK_001321892.1       | GAT GAT AAT ATC AAG ACA CCT GCC | GAG CGT CTG CCG GGG CCG CTT CCA CCC TCA |

↓ In *NPIP16*, the upstream 13-bp indel of GAGCGTCTGCGGG (red) results in frame-shift (purple), while the same indel allele downstream (blue) restores the original frame (black).

**C. Observed codon sequences among NPIP16 and its close relatives after the two indel events**

|                      |             |             |                                         |
|----------------------|-------------|-------------|-----------------------------------------|
| MEL_NPIP16_GM10539   | CTG CCG AGC | GTC TGC GGG | GAG CGT CTG CCG GGG CCG CTT CCA CCC TCA |
| MEL_NPIP16_GM10541   | CTG CCG AGC | GTC TGC GGG | GAG CGT CTG CCG GGG CCG CTT CCA CCC TCA |
| MEL_NPIP16_HGDP00550 | CTG CCG AGC | GTC TGC GGG | GAG CGT CTG CCG GGG CCG CTT CCA CCC TCA |
| NN_130464.3          | CTG CCG AGC | GTC TGC GGG | GAG CGT CTG CCG GGG CCG CTT CCA CCC TCA |
| NM_001135865.1       | CTG CCG AGC | GTC TGC GGG | GAG CGT CTG CCG GGG CCG CTT CCA CCC TCA |
| NM_001355401.1       | CTG CCG AGC | GTC TGC GGG | GAG CGT CTG CCG GGG CCG CTT CCA CCC TCA |
| NM_001310137.2       | CTG CCG AGC | GTC TGC GGG | GAG CGT CTG CCG GGG CCG CTT CCA CCC TCA |
| NM_001310148.1       | CTG CCG AGC | GTC TGC GGG | GAG CGT CTG CCG GGG CCG CTT CCA CCC TCA |
| NK_001321892.1       | CTG CCG AGC | GTC TGC GGG | GAG CGT CTG CCG GGG CCG CTT CCA CCC TCA |

  

|                      |         |                                                                                                 |
|----------------------|---------|-------------------------------------------------------------------------------------------------|
| MEL_NPIP16_GM10539   | CCT CAG | CGG ATG ATA ATC TCA AGA CAG CTT CCG AGC GTC AGC TCA CTC CCG TTC CAC COT CAG CTC CAG CAG         |
| MEL_NPIP16_GM10541   | CCT CAG | CGG ATG ATA ATC TCA AGA CAG CTT CCG AGC GTC AGC TCA CTC CCG TTC CAC COT CAG CTC CAG CAG         |
| MEL_NPIP16_HGDP00550 | CCT CAG | CGG ATG ATA ATC TCA AGA CAG CTT CCG AGC GTC AGC TCA CTC CCG TTC CAC COT CAG CTC CAG CAG         |
| NN_130464.3          | CCC TCA | GCG GAT GAT AAT CTC AAG ACA CCT TCC GAG CGT CAG CTC ACT CCC CTT CCA CCG TCA GCT CCA CCC TCA GCA |
| NM_001135865.1       | CCC TCA | GCG GAT GAT AAT CTC AAG ACA CCT TCC GAG CGT CAG CTC ACT CCC CTT CCA CCG TCA GCT CCA CCC TCA GCA |
| NM_001355401.1       | CCC TCA | GCG GAT GAT AAT CTC AAG ACA CCT TCC GAG CGT CAG CTC ACT CCC CTT CCA CCG TCA GCT CCA CCC TCA GCA |
| NM_001310137.2       | CCC TCA | GCG GAT GAT AAT CTC AAG ACA CCT TCC GAG CGT CAG CTC ACT CCC CTT CCA CCG TCA GCT CCA CCC TCA GCA |
| NM_001310148.1       | CCC TCA | GCG GAT GAT AAT CTC AAG ACA CCT TCC GAG CGT CAG CTC ACT CCC CTT CCA CCG TCA GCT CCA CCC TCA GCA |
| NK_001321892.1       | CCC TCA | GCG GAT GAT AAT CTC AAG ACA CCT TCC GAG CGT CAG CTC ACT CCC CTT CCA CCG TCA GCT CCA CCC TCA GCA |

  

|                      |                                                 |                                         |
|----------------------|-------------------------------------------------|-----------------------------------------|
| MEL_NPIP16_GM10539   | ATG ATA ATA TCA AGA CAC CTG CCG AGC GTC TGC GGG | GAG CGT CTG CCG GGG CCG CTT CCA CCC TCA |
| MEL_NPIP16_GM10541   | ATG ATA ATA TCA AGA CAC CTG CCG AGC GTC TGC GGG | GAG CGT CTG CCG GGG CCG CTT CCA CCC TCA |
| MEL_NPIP16_HGDP00550 | ATG ATA ATA TCA AGA CAC CTG CCG AGC GTC TGC GGG | GAG CGT CTG CCG GGG CCG CTT CCA CCC TCA |
| NN_130464.3          | GAT GAT AAT ATC AAG ACA CCT GCC                 | GAG CGT CTG CCG GGG CCG CTT CCA CCC TCA |
| NM_001135865.1       | GAT GAT AAT ATC AAG ACA CCT GCC                 | GAG CGT CTG CCG GGG CCG CTT CCA CCC TCA |
| NM_001355401.1       | GAT GAT AAT ATC AAG ACA CCT GCC                 | GAG CGT CTG CCG GGG CCG CTT CCA CCC TCA |
| NM_001310137.2       | GAT GAT AAT ATC AAG ACA CCT GCC                 | GAG CGT CTG CCG GGG CCG CTT CCA CCC TCA |
| NM_001310148.1       | GAT GAT AAT ATC AAG ACA CCT GCC                 | GAG CGT CTG CCG GGG CCG CTT CCA CCC TCA |
| NK_001321892.1       | GAT GAT AAT ATC AAG ACA CCT GCC                 | GAG CGT CTG CCG GGG CCG CTT CCA CCC TCA |

1337  
1338

1339 **Figure S51. A unique peptide sequence structure in *NPIP16* compared with its close relatives**  
 1340 **likely resulted from two indel events involving the same 13 bp repeat motif. (A)** *dN/dS* analysis  
 1341 reveals a cluster of amino acid substitutions at position 1236-1284 (alignment space). Codon sequences  
 1342 corresponding to the cluster are shown in panels B and C. **(B)** The hypothesized codon sequences of  
 1343 *NPIP16* prior to the two indel events. The highlighted (red) 13 bp repeat motif, GAGCGTCTGCGGG,  
 1344 appears in all sequences presented here. **(C)** The upstream indel (red) causes the *NPIP16* codon  
 1345 sequences be out-of-frame, while the other indel (blue) downstream restores the original frame (black).  
 1346 Note that for the sake of simplicity, the resulting codon sequences were not realigned.  
 1347

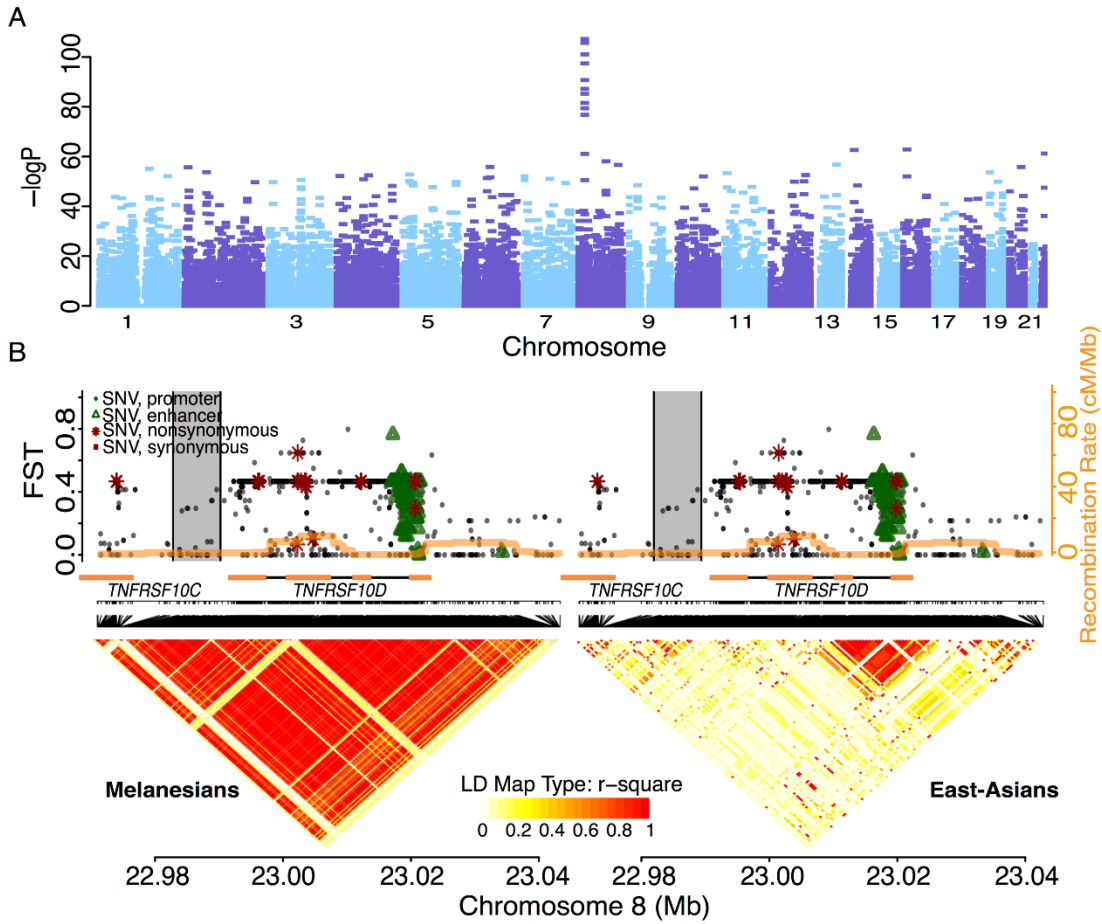

1348  
 1349  
 1350  
 1351  
 1352  
 1353  
 1354  
 1355

**Figure S52. The strongest signal of selection in Melanesians intersecting two highly stratified deletion and duplication variants at 8p21.3.** (A) The Manhattan plot of Bonferroni  $p$ -values of the window-based  $F_{ST}$  test (Methods). (B) Distribution of  $F_{ST}$ , functional annotation (RefSeq and ENCODE elements; Methods), and recombination rate (HapMap) for all variants (dots). Genes are shown under the plot with black lines (noncoding sequences) and orange boxes (exons). Bottom panels show the patterns of linkage disequilibrium, measured in  $r$ -square, across the locus.

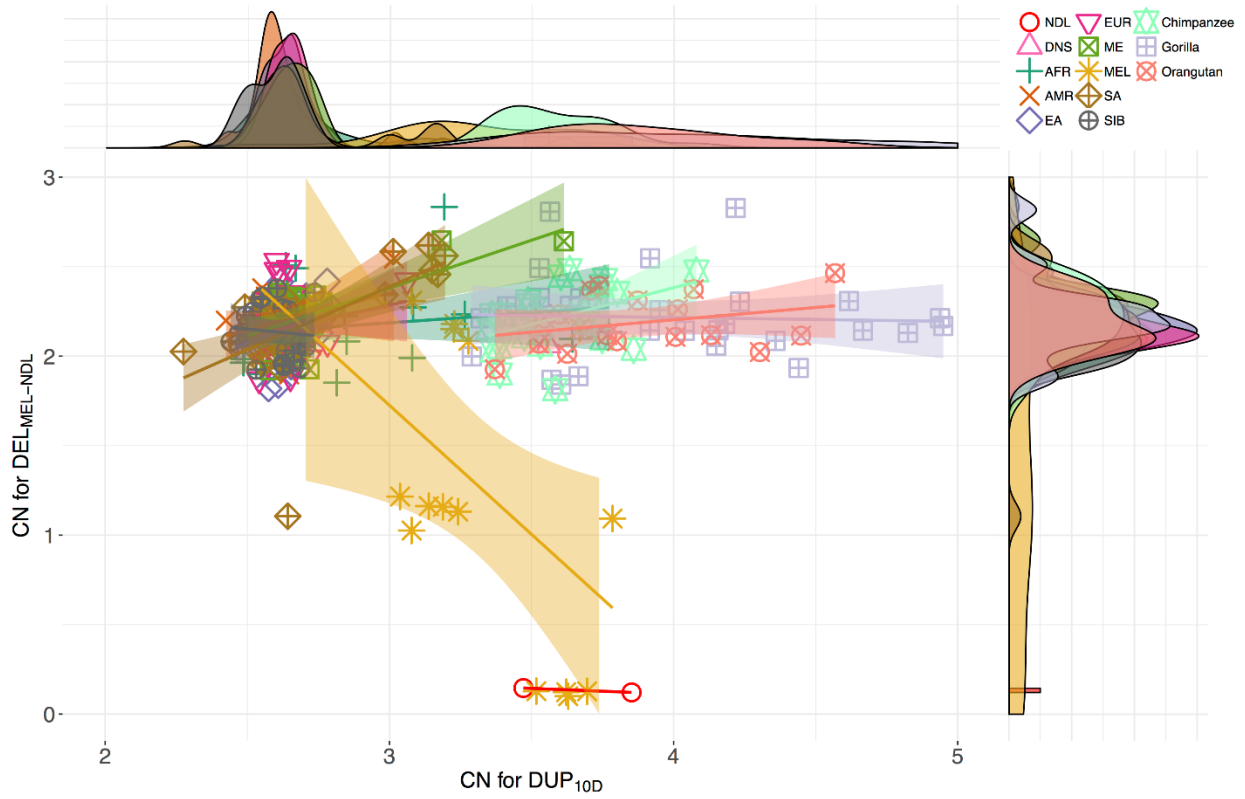

1356  
 1357  
 1358  
 1359

**Figure S53. The joint distribution of CN estimates for  $DEL_{MEL-NDL}$  and  $DUP_{10D}$  across great ape species. Linear regression lines and 95% C.I. were drawn for individual populations.**

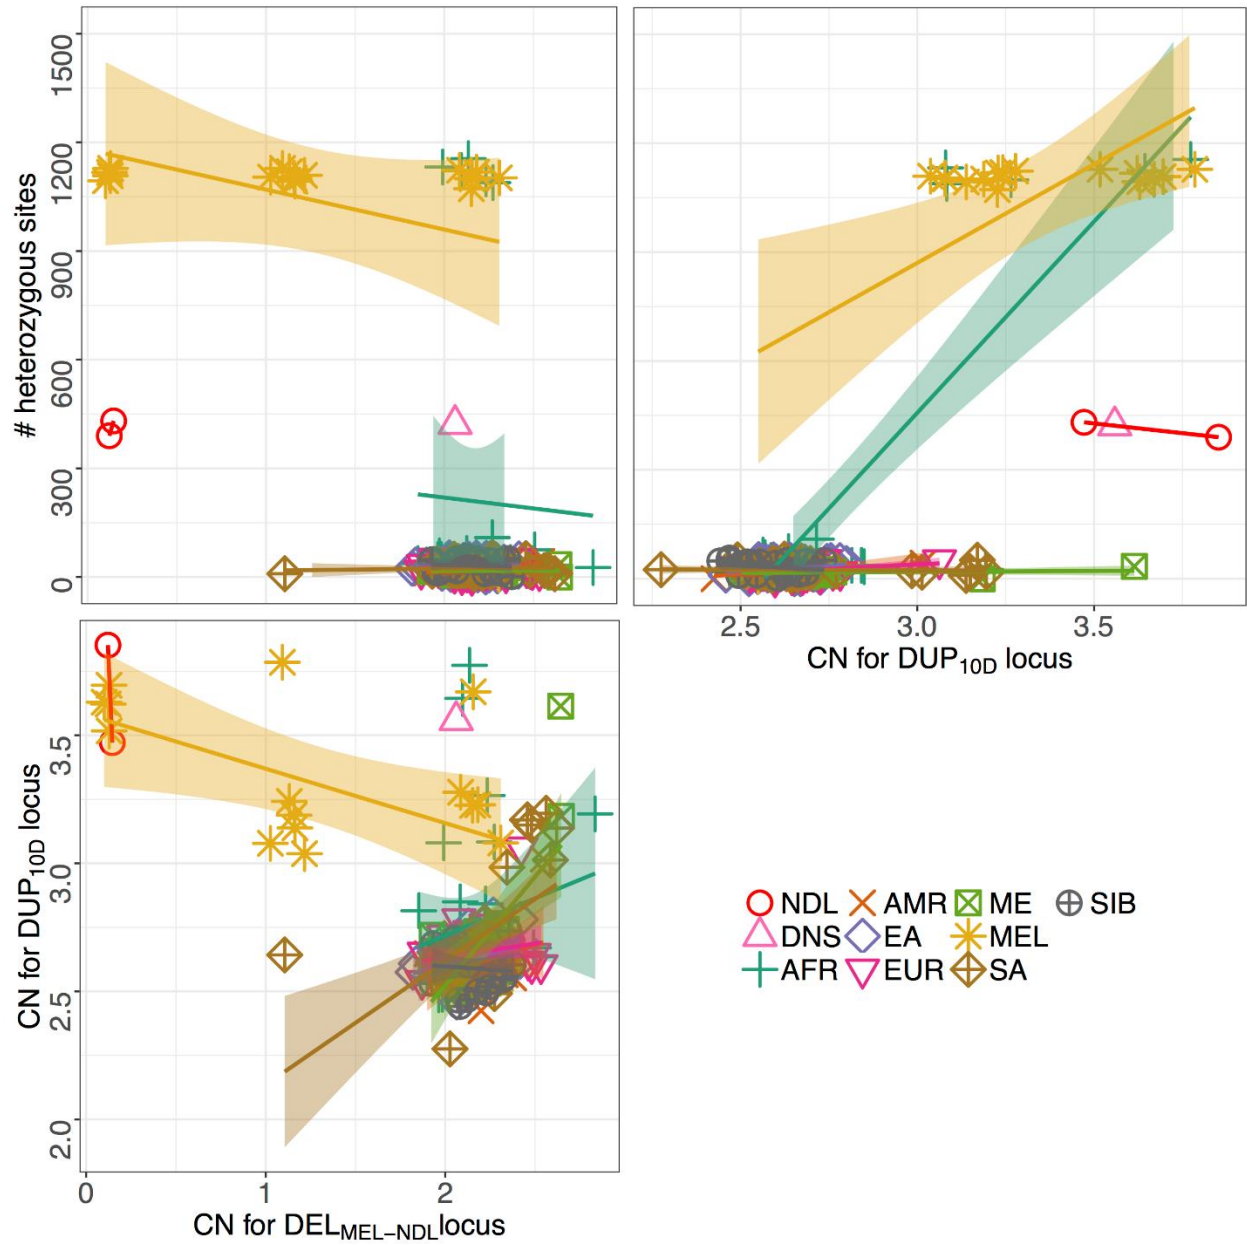

1360  
 1361  
 1362  
 1363  
 1364  
 1365  
 1366

**Figure S54. Pairwise joint distributions among CN estimates of  $DEL_{MEL-NDL}$ ,  $DUP_{10D}$ , and the number of heterozygous sites of the  $DUP_{10D}$  locus for all SGDP and the three archaic samples. Each symbol is the data from an individual. Linear regression lines and their 95% C.I. region were drawn for individual populations.**

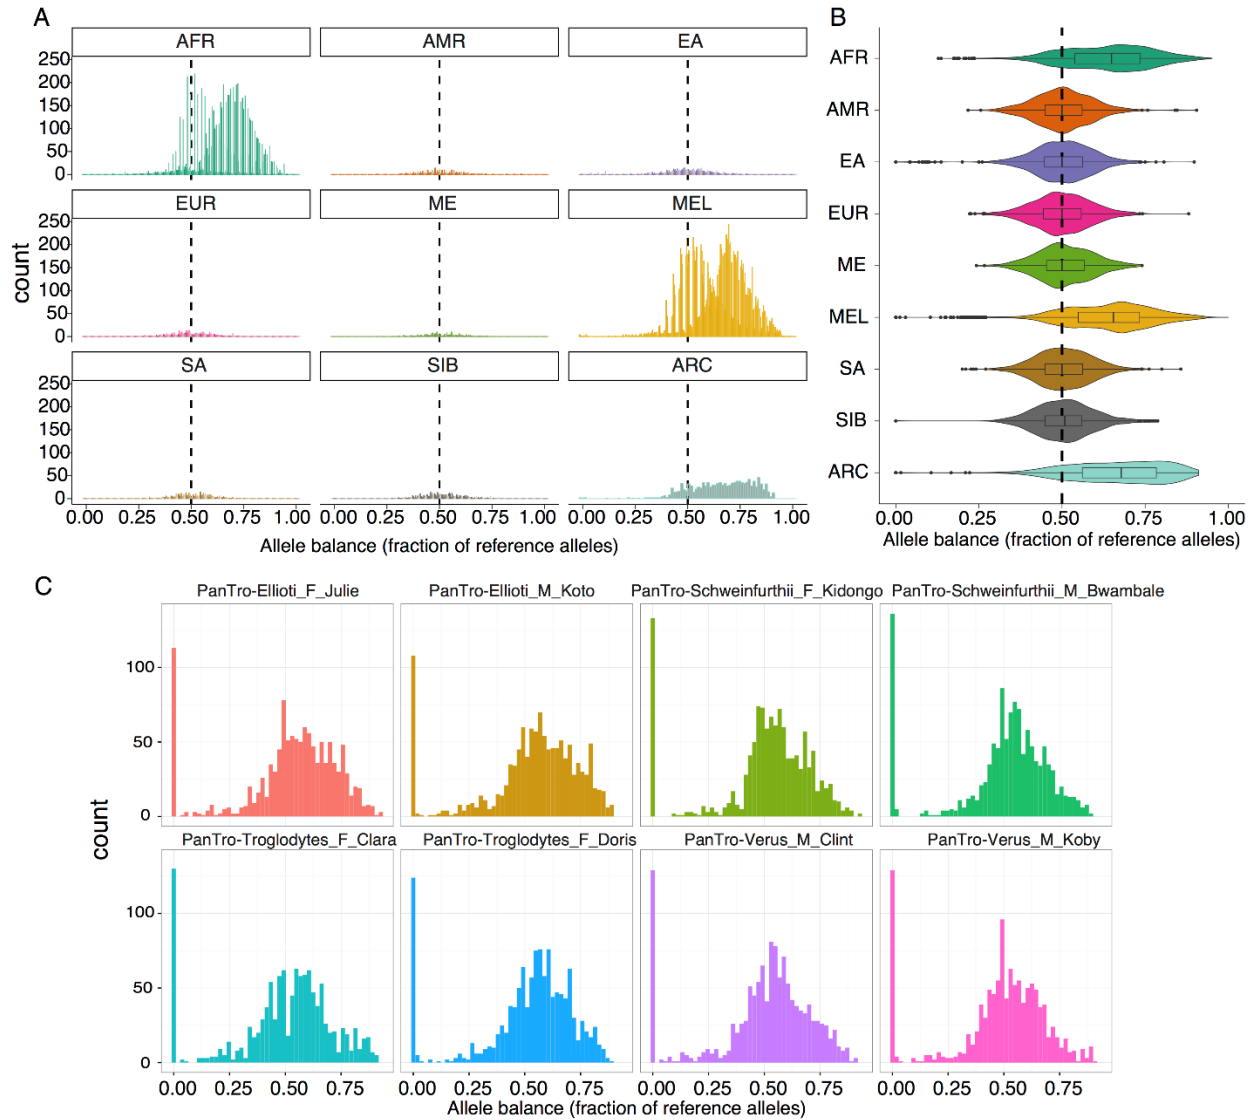

1367  
 1368  
 1369  
 1370  
 1371  
 1372  
 1373  
 1374  
 1375  
 1376  
 1377

**Figure S55. Observations of allele imbalance in individuals carrying the  $DUP_{10D}$  duplication variant: AFR (7/33), MEL (15/16), the archaic hominin (ARC, 3/3), and chimpanzee (8/8) samples.** Distributions of allele balance for heterozygous sites at the  $DUP_{10D}$  locus were shown for individual SGDP populations (A) and chimpanzee genomes (C). For the eight chimpanzee genomes (Great Ape Project, 2013), reads were mapped to the human reference (GRCh37) using BWA-MEM (v0.7.12) and SNVs at the  $DUP_{10D}$  locus were called using FreeBayes (v1.0.2). (B) Violin plots of allele balance across the eight SGDP super-populations, along with the ARC samples, show a clear pattern of allele imbalance in populations, where the  $DUP_{10D}$  variants are present.

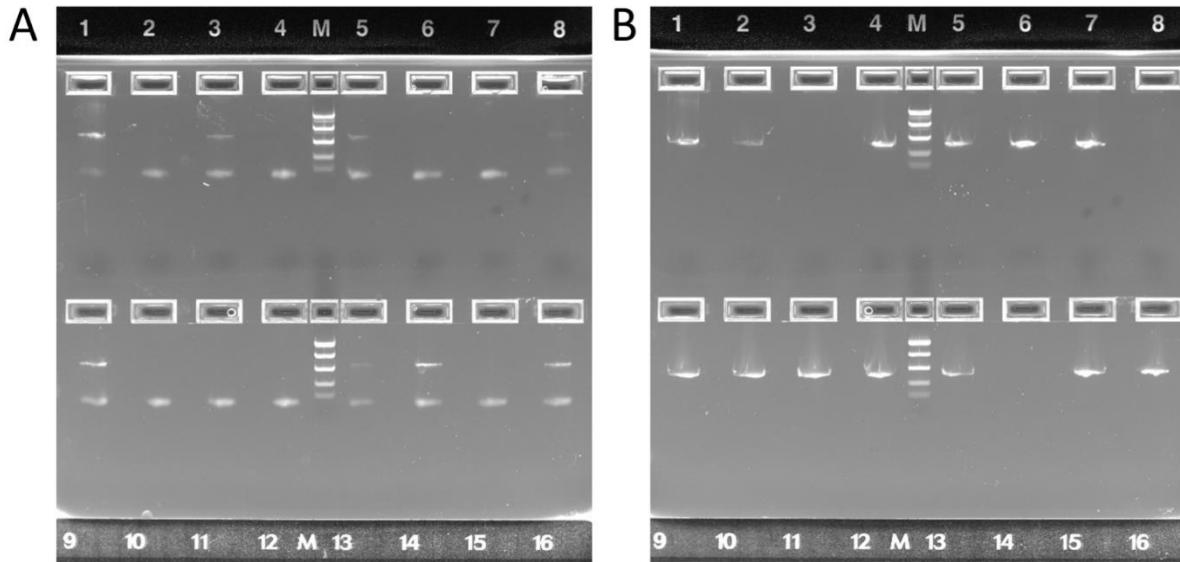

1378  
 1379  
 1380  
 1381  
 1382  
 1383  
 1384  
 1385  
 1386  
 1387  
 1388  
 1389  
 1390

**Figure S56. PCR validation of the  $DEL_{MEL-NDL}$  variant using 16 randomly selected blood-derived Melanesian DNA samples.** Ladder is at 2000 bp, 800 bp, 400 bp, 200 bp, and 100 bp. **(A)** Gel of PCR product from the first PCR assay showing the 501 bp product that is produced when the deletion is present (~50 bp band is primer dimer). Samples 1, 3, 5, 8, 9, 13, 14, and 16 all have at least one chromosome where the deletion is present. **(B)** Gel of PCR product from the second assay that amplifies a 300 bp fragment within the deletion region. Samples 3, 8, and 14 do not have product in this region and therefore are homozygous for the deletion (CN0). Samples 1, 5, 9, 13, and 16 have at least one copy of this region but also have the deletion band seen in A, so therefore are heterozygous for the deletion (CN1). Samples 2, 4, 6, 7, 10, 11, 12, and 15 do not have the deletion (CN2) because they did not have the deletion band (in A) and do have PCR product for the fragment within the deleted region.

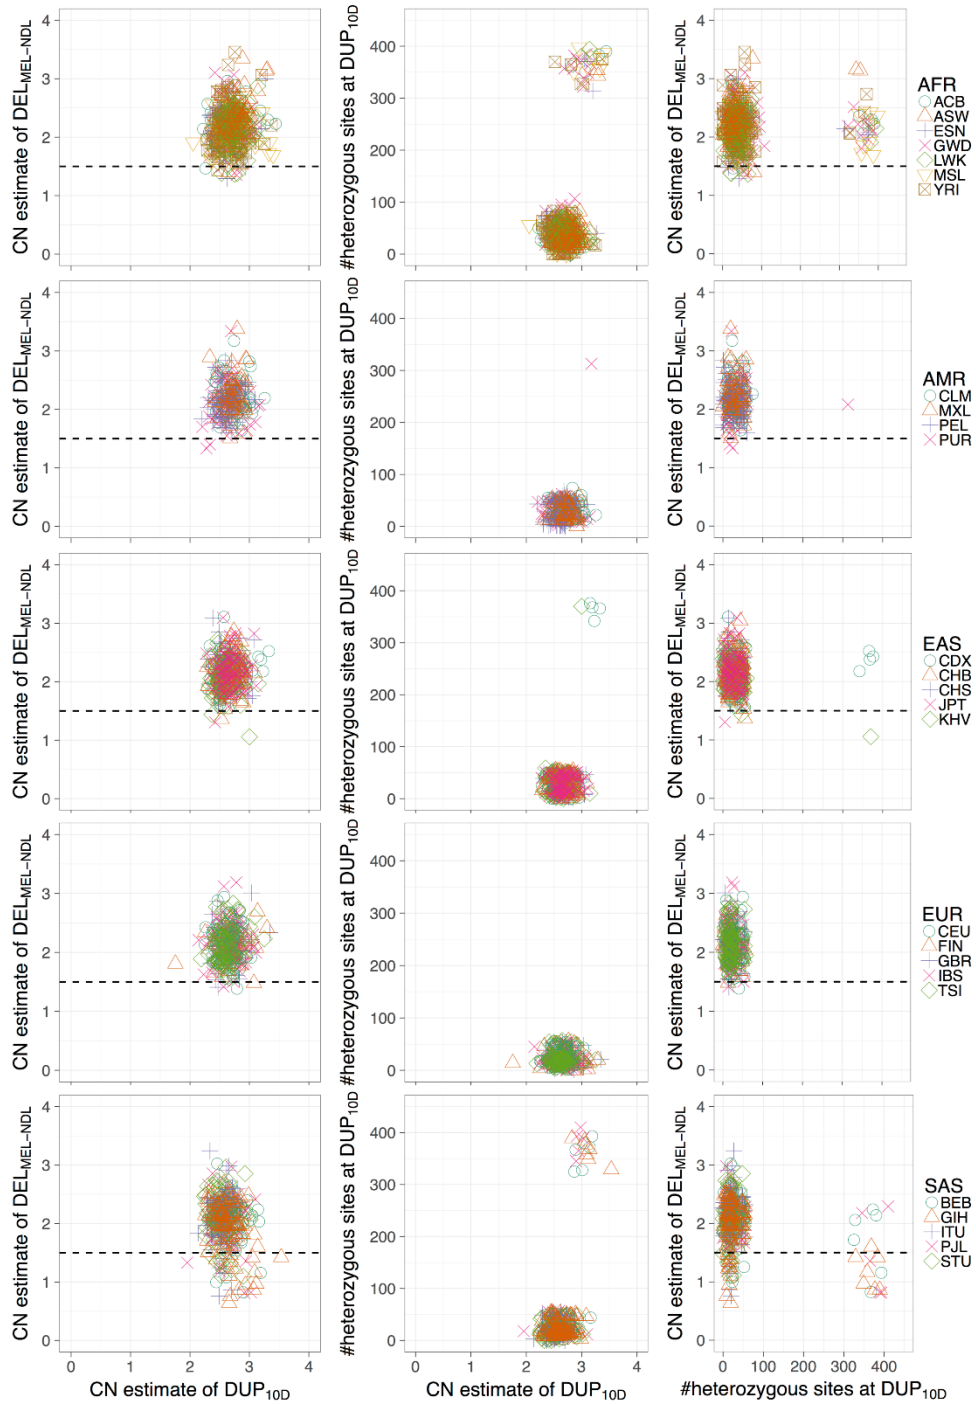

1391  
 1392  
 1393  
 1394  
 1395

**Figure S57. Patterns of heterozygosity, along with the CN estimates for both  $DUP_{10D}$  and  $DEL_{MEL-NDL}$ , in all 1KG populations. Each symbol represents the estimated quantity for an individual.**



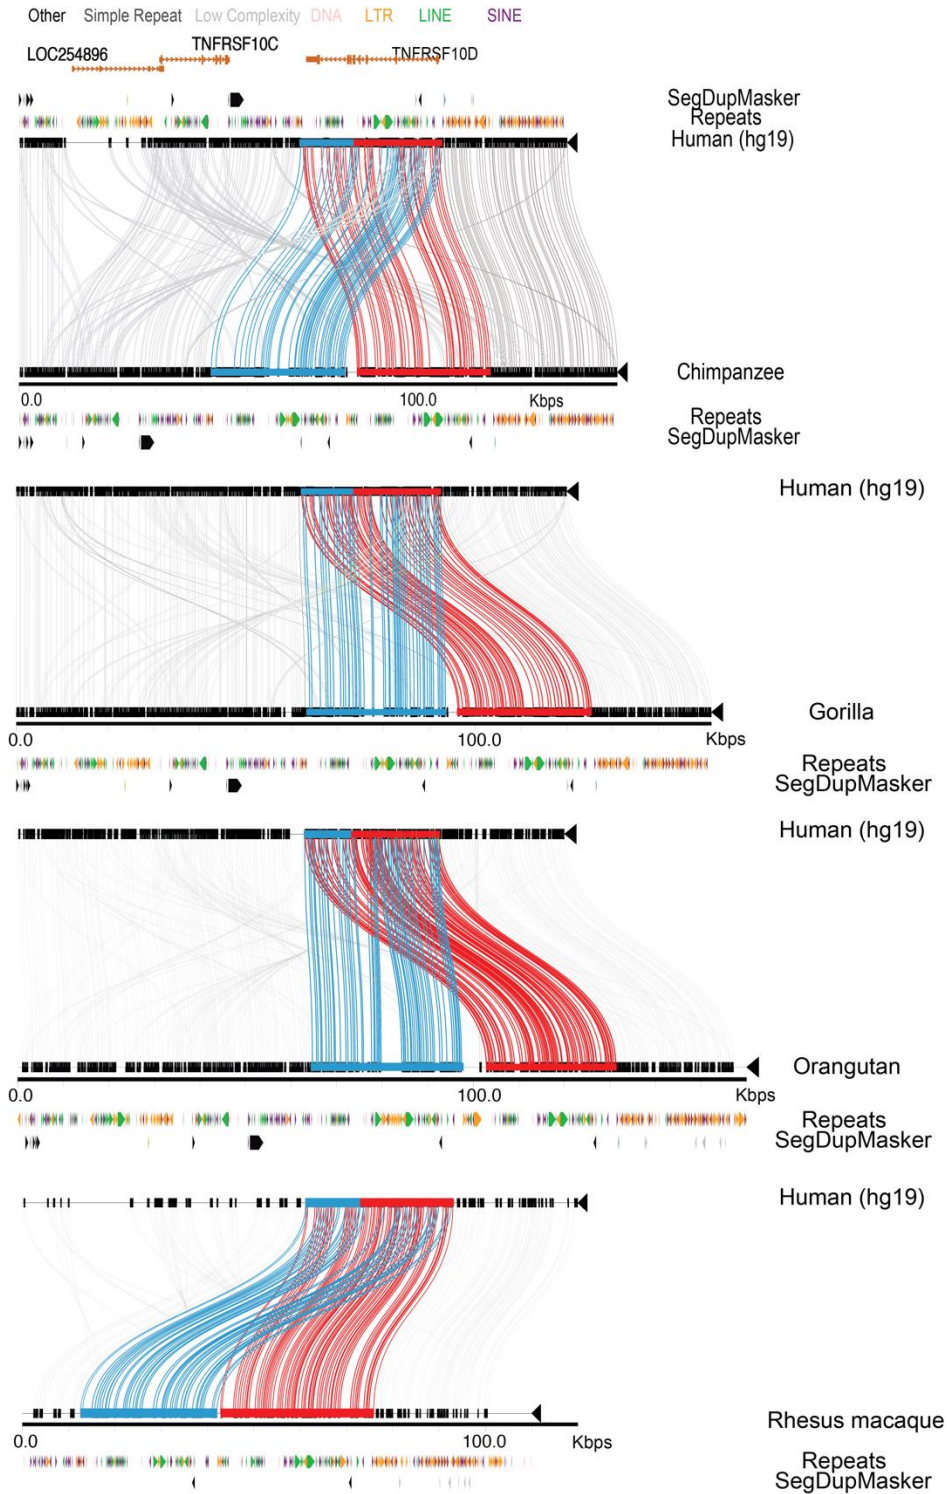

1396  
1397  
1398  
1399  
1400  
1401  
1402  
1403

**Figure S58. Miroppeats reveals the tandem organization of *TNFRSF10D* duplications in nonhuman primates.** High-quality homologous sequences to human *TNFRSF10D* (GRCh37) for four nonhuman primates were generated using BAC libraries and sequenced using PacBio technology. Blue and red traces aligned sequences between human reference and nonhuman primate *TNFRSF10D1* and *TNFRSF10D2*, respectively. Shown below the bottom track in each nonhuman primate are the repeat elements annotated using RepeatMasker (v3.3.0) as well as SDs.

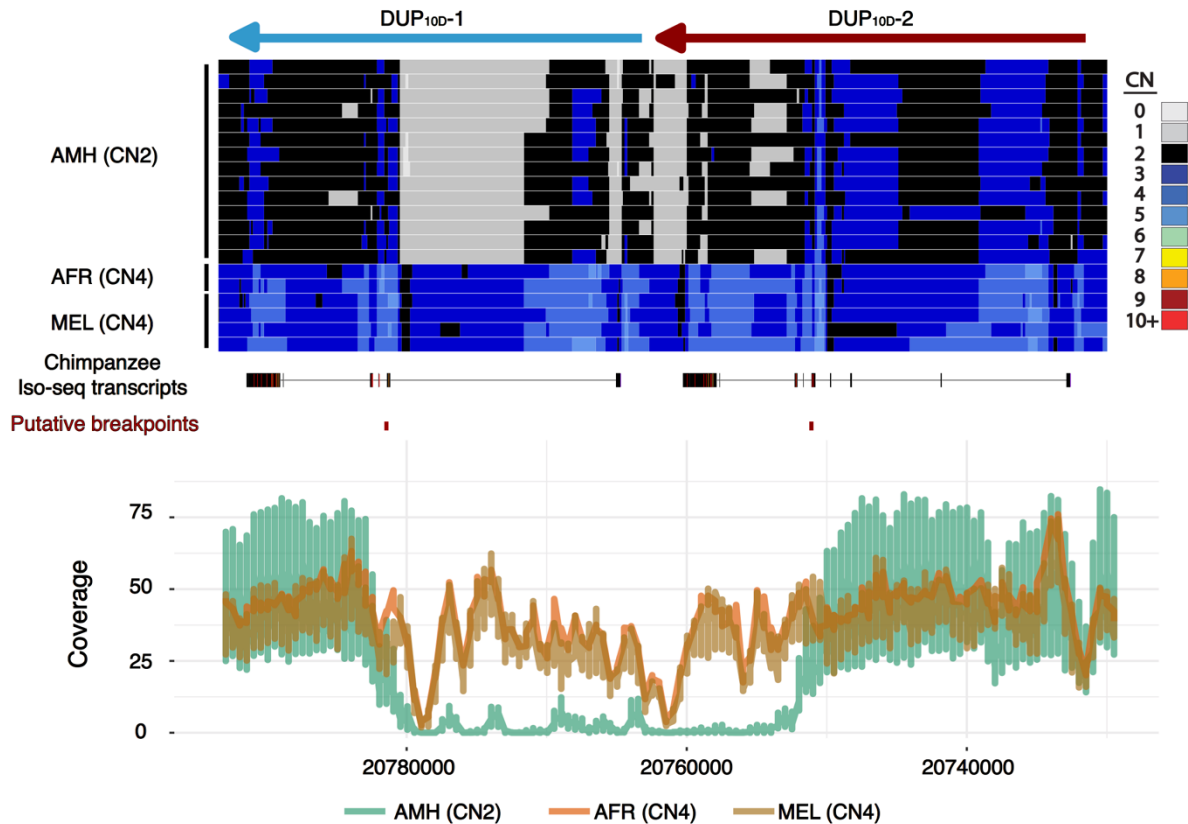

1404  
 1405 **Figure S59. Organization of duplications at the *TNFRSF10D* locus in chimpanzee.** *TNFRSF10D1*  
 1406 and *TNFRSF10D2* are in the same orientation as the human reference (GRCh37). Top panel: CN heat  
 1407 maps for a subset of CN2 modern human samples, followed by AFR and MEL duplication carriers. Gene  
 1408 models of *TNFRSF10D1* and *TNFRSF10D2* were inferred using PacBio IsoSeq technology (53). The  
 1409 breakpoints of DUP<sub>10D</sub> in the chimpanzee reference sequence were inferred based on read-depth profile  
 1410 (bottom panel) and a hidden Markov Model utilizing a sequence alignment among human reference and  
 1411 the two chimpanzee *TNFRSF10D1* and *TNFRSF10D2* sequences (**Methods**). In the analysis of read-  
 1412 depth profile, reads of all SGDP samples were mapped to a recently published high-quality chimpanzee  
 1413 assembly (Kronenberg et al., 2018). Read-depth profile of a sample was estimated using 1000 bases with  
 1414 a step size of 500 bases sliding across the region. Each color bar represents the depth range of a given  
 1415 window.  
 1416

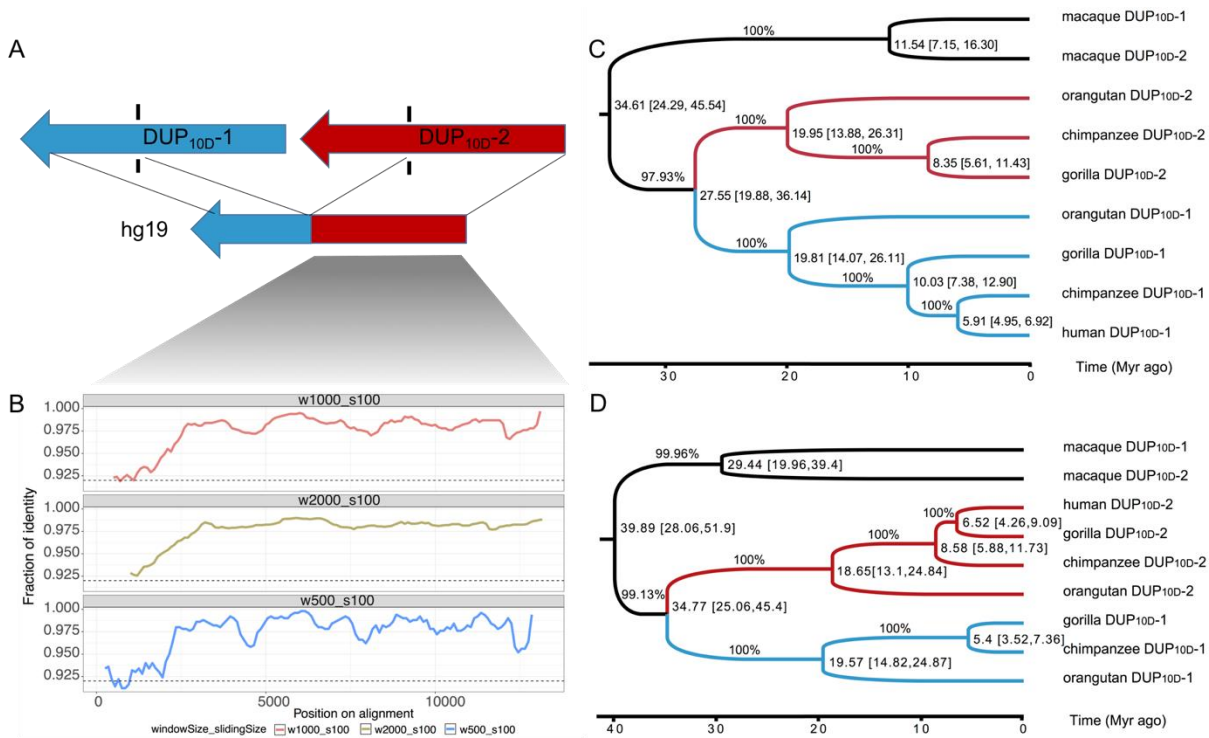

1417  
 1418  
 1419  
 1420  
 1421  
 1422  
 1423  
 1424  
 1425  
 1426  
 1427  
 1428  
 1429  
 1430  
 1431  
 1432  
 1433  
 1434  
 1435  
 1436

**Figure S60. Phylogenetic analyses of the DUP<sub>10D</sub> duplication sequences among primate species.**

Long-read BAC sequences of the DUP<sub>10D</sub> locus for three great ape lineages (chimpanzee, gorilla, and orangutan) and one Old World rhesus macaque monkey were generated using BAC libraries. (A) Schematic of *TNFRSF10D* gene fusion in modern humans with respect to the putative ancestral tandem duplication form in other primates. (B) Compelling evidence for interlocus gene conversion between the rear (gray shaded) portions of the *TNFRSF10D1* and *TNFRSF10D2* sequences in orangutan indicated by high sequence identity. Fractions of sequence identity were calculated using three window sizes (1000, 2000, and 500 bp) and a sliding of 100 bp across the sequence alignment. Sharp increases in sequence identity, compared with the mean identity of 0.921 between the two sequences in orangutan, especially beyond the position 2,500, are consistent with the hypothesis of interlocus gene conversion. (C and D) Evolutionary history of DUP<sub>10D</sub> sequences in primates inferred by Bayesian phylogenetic trees (BEAST v.2.5.0; **Methods**). Two trees were built separately using homologous sequences to the human reference (GRCh37) *TNFRSF10D1* and *TNFRSF10D2* sequences (blue and red portions in A). Numbers at the nodes are the divergence estimates with 95% high posterior density intervals, while the percentages on branches indicate the posterior probabilities supporting the branches. Note that a gene tree–species tree discordance within the *TNFRSF10D2* Hominae phylogeny likely arose as a result of incomplete lineage sorting.

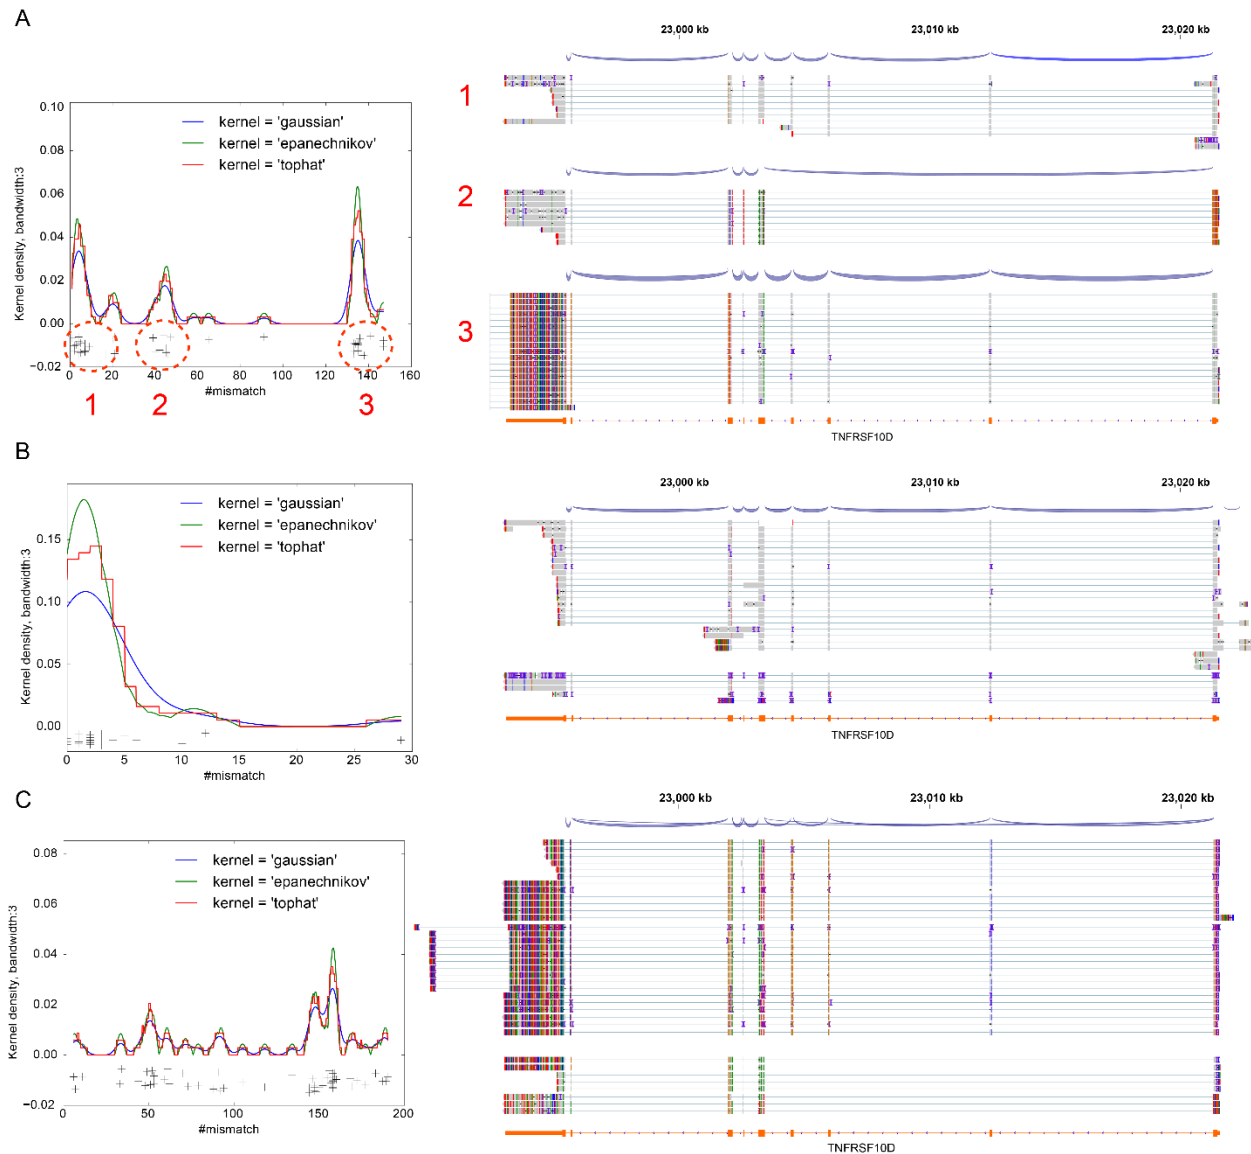

1437  
 1438  
 1439 **Figure S61. FLNC transcripts of *TNFRSF10D* locus for Melanesian (GM10541, CN3), European**  
 1440 **(GM12878, CN2), and chimpanzee (PanTro, CN4) fibroblast cell line samples.** Full-length transcripts  
 1441 were generated using the PacBio long-read sequencing technology. The FLNC transcripts were mapped to  
 1442 human reference (GRCh37) using minimap2 (v2.1), and the number of mismatches for each transcript  
 1443 were computed against the human reference sequence. Left panels show the kernel density distributions  
 1444 of mismatches for the transcripts, while right panels are subsets of FLNC transcript reads mapped to the  
 1445 *TNFRSF10D* locus in GRCh37. Vertical color bars on each transcript indicate mismatches. (A) All three  
 1446 types of *TNFRSF10D* transcripts, including *TNFRSF10D1* (6 exons, cluster 2), *TNFRSF10D2* (9 exons,  
 1447 cluster 3), and the fusion gene *TNFRSF10D* (9 exons, cluster 1), are clearly present in the CN3  
 1448 Melanesian sample. (B) In the CN2 European sample GM12878, all transcripts present 9 exons and low  
 1449 numbers of mismatches, suggesting that they are all the version of fusion gene *TNFRSF10D*. (C) Both 6-  
 1450 exon and 9-exon transcripts are present in the chimpanzee sample with high numbers of mismatches for  
 1451 the majority of the reads. Note that we did not observe clear clusters of these transcripts in the  
 1452 chimpanzee sample, likely due to the divergence between human and chimpanzee at this locus.

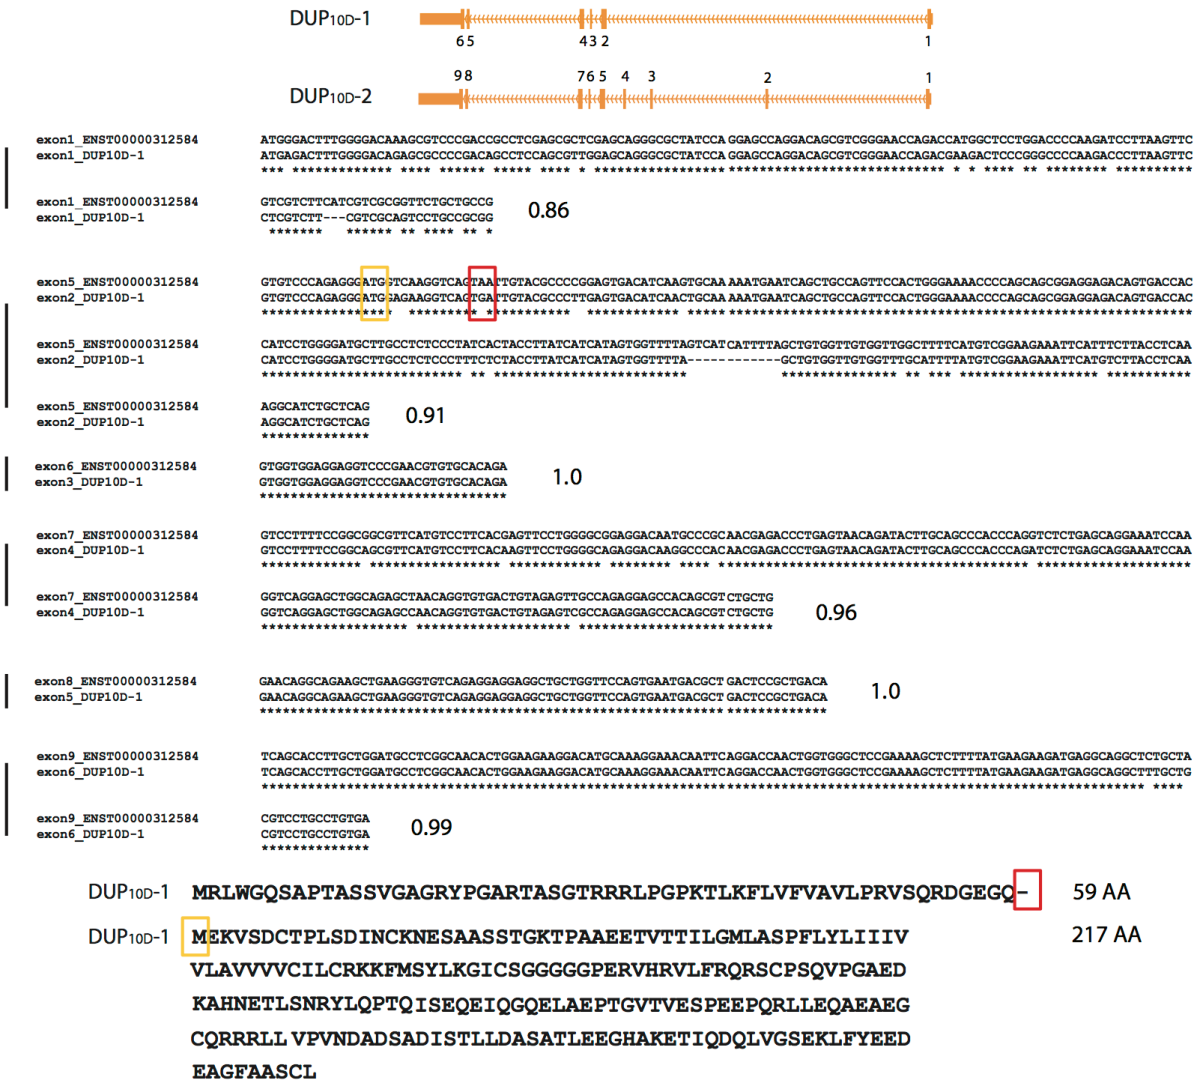

1453  
1454 **Figure S62. Premature stop codon in the chimpanzee *TNFRSF10D1* gene copy.** Gene models (top) of  
1455 the two copies of *TNFRSF10D* (*TNFRSF10D1* and *TNFRSF10D2*) in chimpanzee were inferred using  
1456 PacBio Iso-Seq data from a chimpanzee sample and the resulting sequences were mapped to the  
1457 corresponding chimpanzee assembly (Kronenberg et al., 2018). Middle panel shows the exon sequence  
1458 alignments between human reference *TNFRSF10D* and chimpanzee *TNFRSF10D1*. The numbers after  
1459 each alignment are the proportion of sequence identity (stars). *TNFRSF10D1* was truncated after 59  
1460 amino acids due to a stop codon in its second exon (highlighted in the red box) but is likely translated to a  
1461 protein with 217 amino acids using a second start codon (highlighted in the orange box) in a different  
1462 frame, upstream of the stop codon in exon 2.  
1463

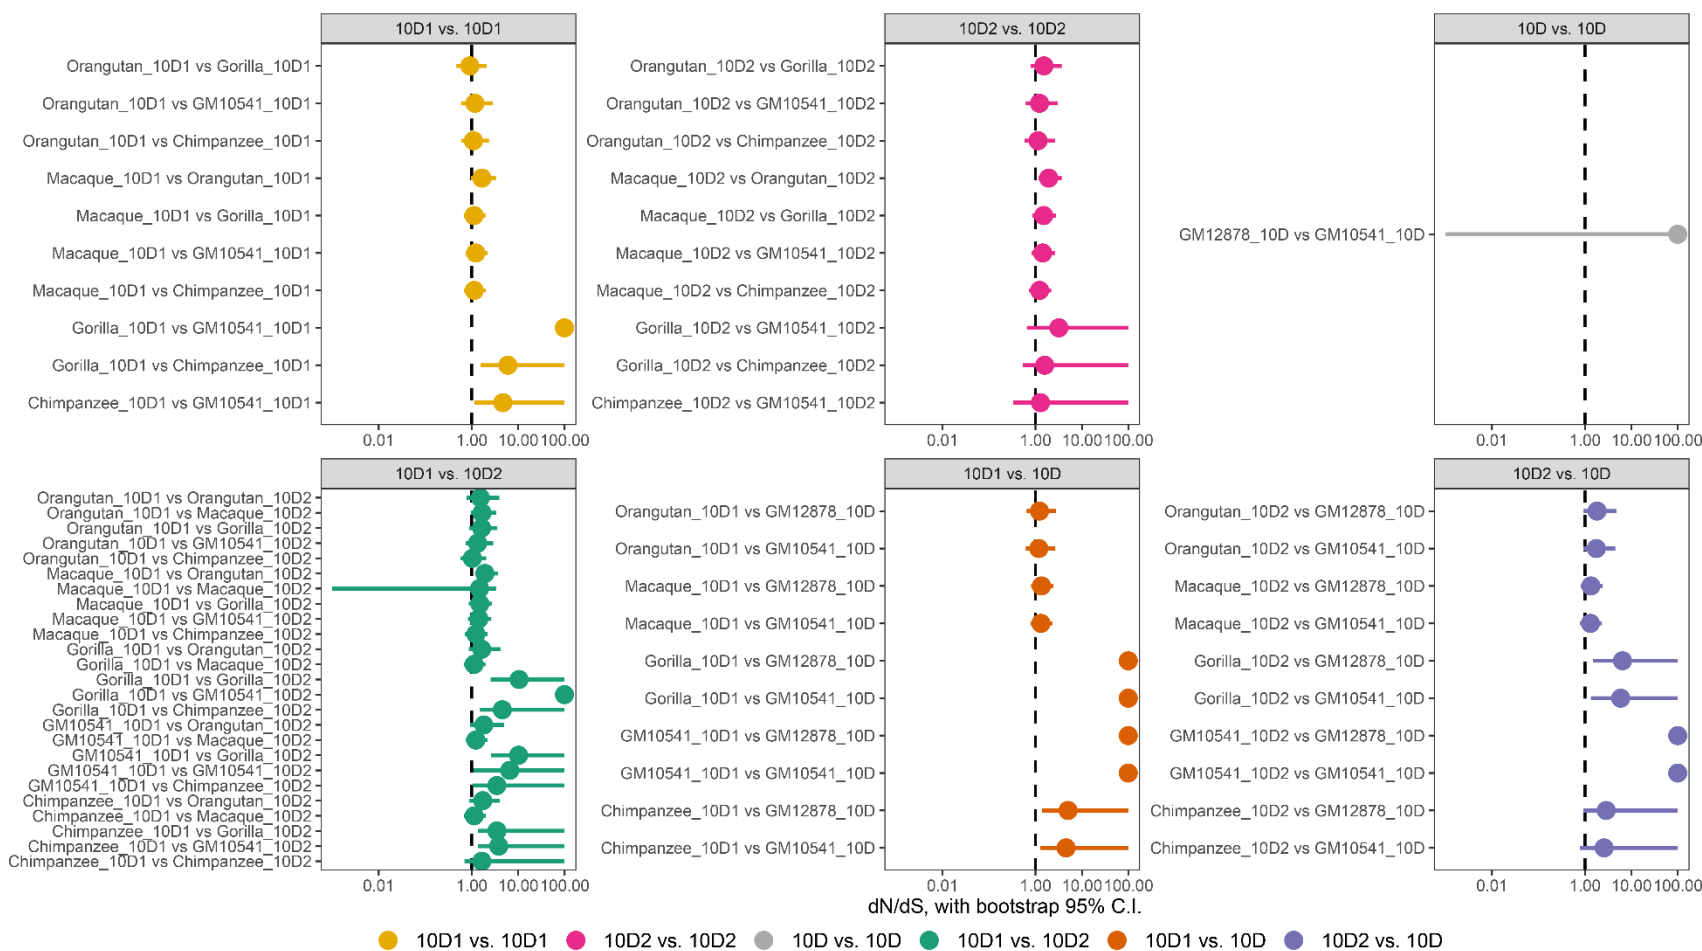

1464  
1465  
1466  
1467  
1468  
1469  
1470  
1471  
1472

**Figure S63. Pairwise  $dN/dS$  among the ORF sequences of twelve FLNC transcripts in primates.** FLNC transcripts of *TNFRSF10D*, *TNFRSF10D1*, and *TNFRSF10D2* were generated from Melanesian (GM10541, CN3), European (GM12878, CN2), and chimpanzee (PanTro, CN4) fibroblast cell lines. Orthologous transcript sequences in gorilla, orangutan, and rhesus macaque were inferred from their BAC sequences. Predicted ORFs were defined as the longest ORF in all frames of individual transcripts.  $dN/dS$  ratios were estimated using the codeml program in the PAML package (v14.9). 1,000 bootstrap samples of the multiple codon sequence alignment were used to estimate the 95% C.I. Note that PAML reports  $dN/dS = 99$  for a branch when no synonymous mutation was inferred ( $dS = 0$ ) along the lineage.

1473 (A)  
 Branch-site test of dN/dS  
 LogLik: -3239.6  
 #parameters= 45  
 LRT p=0.005

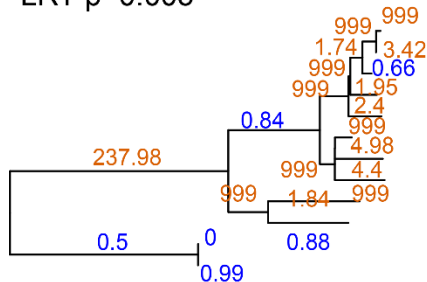

- >0.99
- >0.95
- ≤ 0.95

(B)

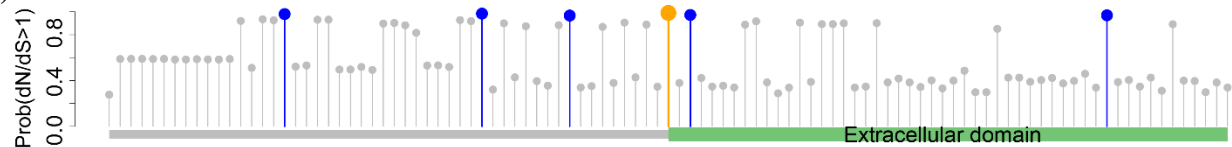

```

MGLWGQSVPTASSARAGRYPGARTASGTRPWL LDPK I LKFVVF I VAVLL PVRVDSAT I PRQDEVPPQQT VAPQQRRSL KEEEC PAGSHRSEYTGACNPCTEGV
MGLWGQSVPTASSARAGRYPGARTASGTRPWL LDSK I LKFVVF I VAVLL PVRVDSAT I PRQDEVPPQQT VAPQQRRSL KEEEC PAGSHRSEYTGACNPCTEGV
MGLWGQSVPTASSARAGRYPGARTASGTRPWL LDPK I LKFVVF I VAVLL PVRVDSAT I PRQDEVPPQQT VAPQQRRSL KEEEC PAGSHRSEYTGACNPCTEGV
MGLWGQSVPTASSARAERYPGARTASGTRPWL LDPK I LKFVVF I VAVLL PVRVDSAT I PGQDEVPPQQT VAPQQRRSL KEEEC PAGSHRSEYTGACNPCTEGV
MGLWGQSVPTASSARAERYPGARTASGTRPWL LDPK I LKFVVF I VAVLL PVRVDSAT I PRQDEVPPQQT VAPQQRRSL KEEEC PAGSHRSEYTGACNPCTEGV
-----
M-----RAPVGRYL AARTASGTRPWLPGPKTLKFVVL I VAVLL PVYVYSAT I PRQDEAPQQT VAPQQRRSL KEEEC PAGSHRSEHTGACNPCTEGV
-----
M-----AASR-----KTLTFVVF I VVVRL L VQVDSAT I SRQDEVPPPPVASQQRRSL -EEKCPAGSHRSEPTGACNACTEGV
-----

```

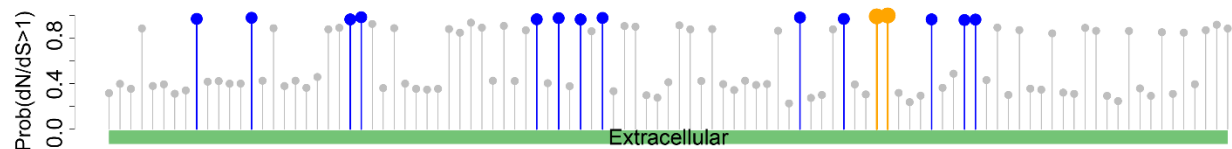

```

DYT I ASNLL PSCL LCTVCKSGQT NKSSCT TTRDTVCQCEKGSFQDKNSPEMCR TCRTGCP RGMVKVSNCT PRSD I KCKNES AASSTGKTPAAEETVTT I LGML
DYT I ASNLL PSCL LCTVCKSGQT NKSSCT TTRDTVCQCEKGSFQDKNSPEMCR TCRTGCP RGMVKVSNCT PRSD I KCKNES AASSTGKTPAAEETVTT I LGML
DYT I ASNLL PSCL LCTVCKSGQT NKSSCT TTRDTVCQCEKGSFQDKNSPEMCR TCRTGCP RGMVKVSNCT SQSD I KCKNES AASSTGKTPAAEETVTT I LGML
DYT I ASNLL PSCL PCTVCKSGQT NKSSCT TTRDTVCQCEKGRFQDKNSPEMCR TCRTGCP RGMVKVSNCT SQSD I KCKNES AASSTGKTPAAEETVTT I LGML
DYT I ASNLL PSCL PCTVCKSGQT NKSSCT TTRDTVCQCEKGRFQDKNSPEMCR TCRTGCP RGMVKVSNCT SQSD I KCKNES AASSTGKTPAAEETVTT I LGML
-----
-----MEKVS DCTPWS D I NCKNES AASSTGKTPAAEETVTT I LGML
-----
-----MEKVS DCTPLSD I NCKNES AASSTGKTPAAEETVTT I LGML
-----
-----MEKVS DCTPWS D I NCKNES AASSTGKTPAAEETVTT I LGML
DYT I ASNLL PSCL LCTVCKSGQT TKSCT TTRDTMCQCEKGSFQDENTPEMCQKRCRTGCP RGMVKVRNCT SQSD I KCKNES AASSTGKTPAAEDT VTTSLGTL
-----
-----MVKVS DCTPWS D I NC -SASAASSTGKTPAAEDT VTTSLWTL
DYT NASNNEPSCL LCAVCKSDEEEMSPCT TTSNRVCQCKPGSFWNGNSTEMCRK CSTGCPREM I KVS DCTPWS D I NC -SASAATSTEKTAVAEETVITSLGTP
-----
-----MIKVS DCTPWS D I NC -SASAATSTEKTAVAEETVITSLGTP
-----

```

1474

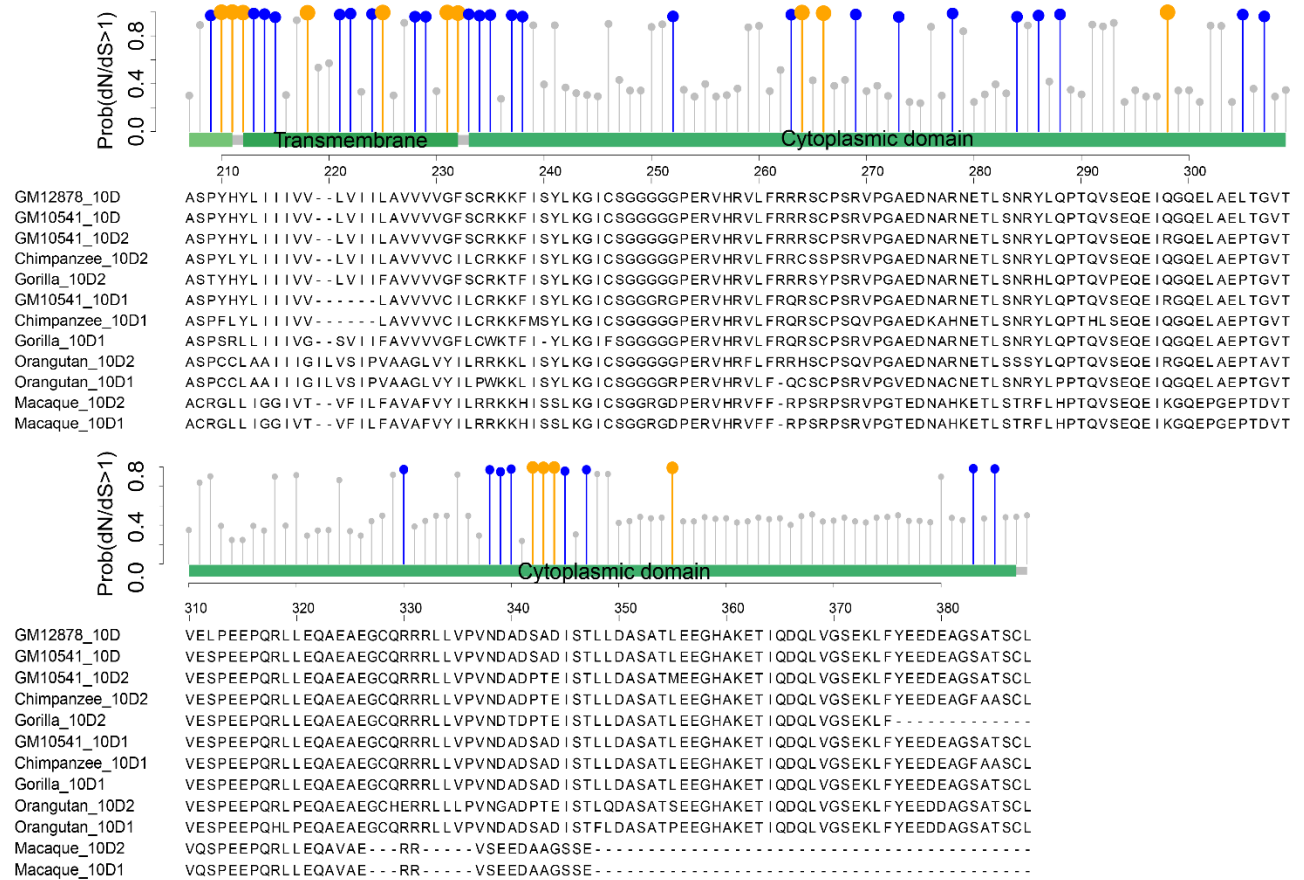

1475  
1476  
1477  
1478  
1479  
1480  
1481  
1482  
1483  
1484  
1485

**Figure S64. Evidence for positive selection at the clade of *TNFRSF10D1* lineages.** Bayesian-based phylogenetic (BEAST) trees and branch supports were inferred for the eight most common ORF sequences from Melanesian (GM10541, CN3), European (GM12878, CN2), chimpanzee (PanTro, CN4), and rhesus macaque (*R.macaque*) samples. *dN/dS* ratios were estimated using the codeml program in the PAML package (v14.9), and colored orange if they are greater than 1. (A) Significant evidence for variable *dN/dS* ratios among the phylogeny. *dN/dS* ratios at the clade of *TNFRSF10D1* lineages are significantly greater than 1, compared to those under the null expectation (*dN/dS* = 1), suggesting the act of positive selection in this clade. Note that PAML reports *dN/dS* = 999 for a branch when no synonymous mutation was inferred (*dS* = 0) along the lineage. (B) The branch-site selection test of PAML identifies a cluster of positively selected sites corresponding to the predicted transmembrane domain of the genes.



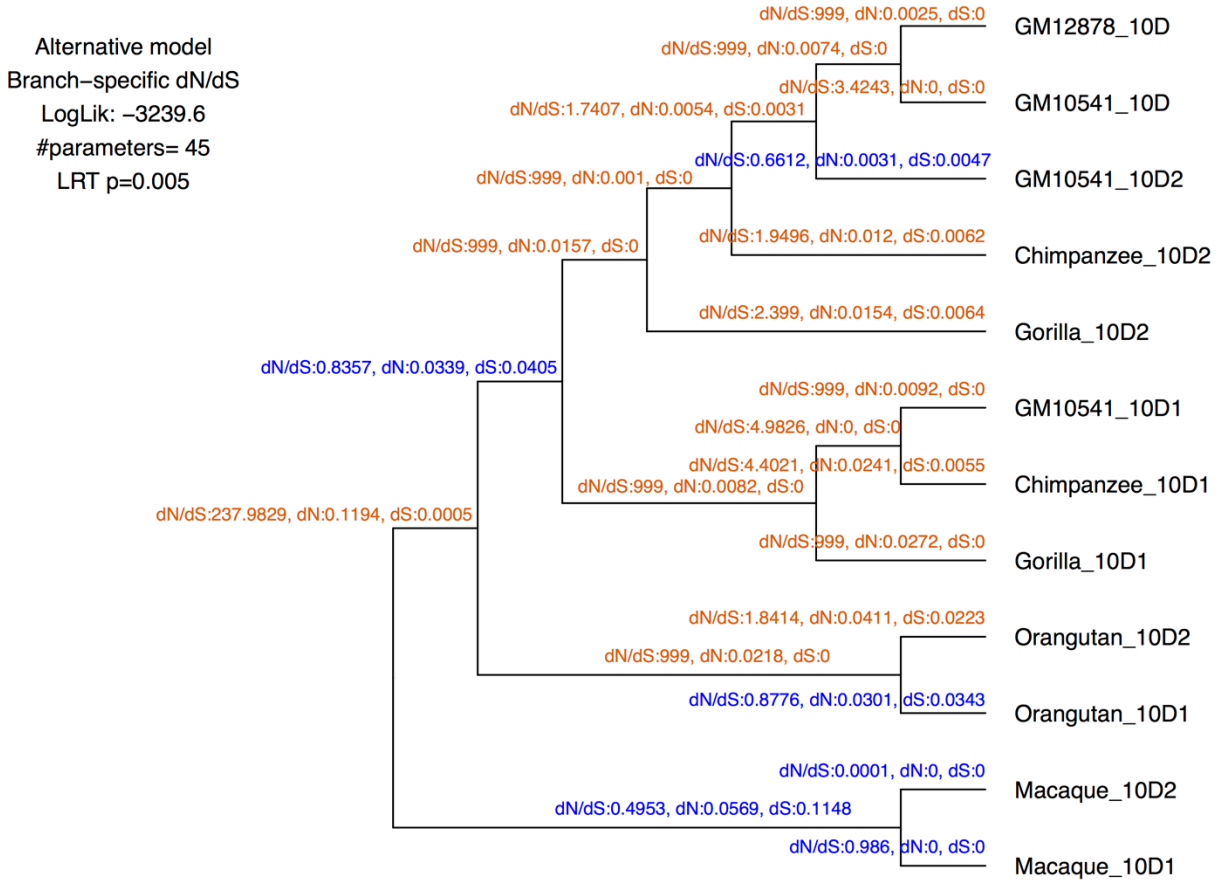

**Figure S65. Cladogram of *TNFRSF10D* lineages showing dN and dS values and dN/dS ratios for individual branches.** The same *TNFRSF10D* sequences as in **Figure S64** were used to estimate the branch-specific dN/dS, dN, and dS values, shown above each branch, using PAML (v14.9). Orange and blue colors indicate if the test of dN/dS ratio  $\geq 1$  is significant ( $p < 0.05$ ) or not ( $p \geq 0.05$ ), respectively. A significance test of the free dN/dS ratios model was based on a chi-squared likelihood ratio test (d.f. = 1) against the null model of neutral evolution ( $dN/dS = 1$ ). The phylogeny of these *TNFRSF10D* sequences (**Figure S64**, left panel) was inferred using BEAST (v2.5.0). Note that PAML reports dN/dS = 99 or 999 for a branch when no synonymous mutation was inferred ( $dS = 0$ ) along the lineage.

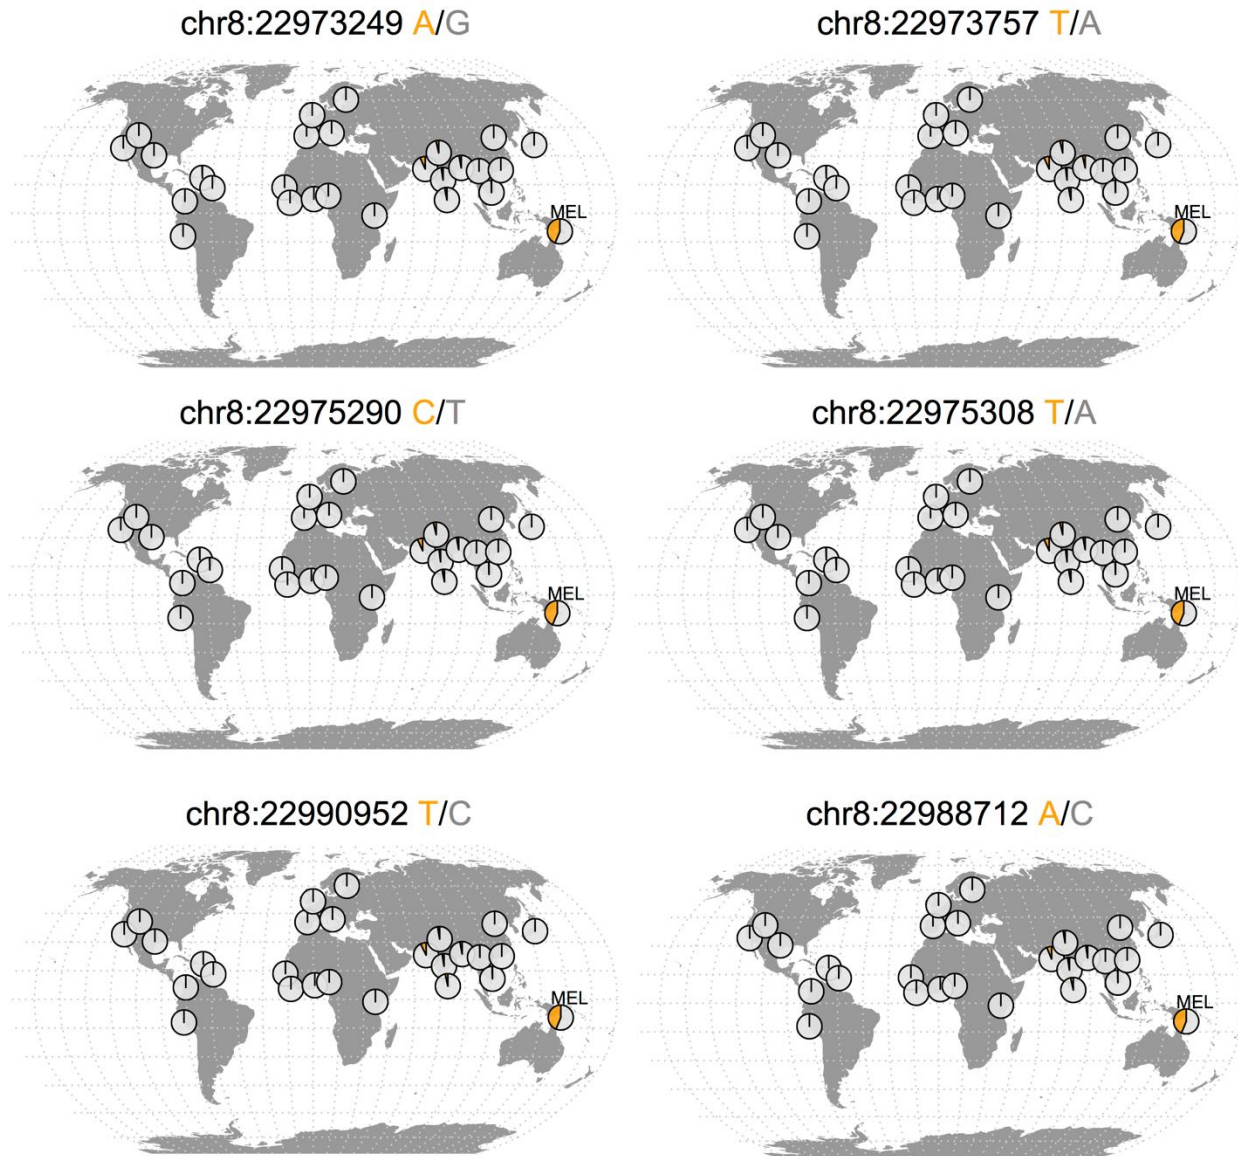

**Figure S66. Geographic allele frequency distributions of six  $DEL_{MEL-NDL}$  deletion-tagged SNVs, in addition to  $rs367585898$  shown in Figure 5A.** The 1KG populations suggest the deletion variant is geographically restricted to mainly South Asians at low frequencies (<0.07). Note that at all sites, the minor (orange) alleles are the deletion-tagged alleles, and the frequencies of these alleles in the Melanesian samples, are all 0.4375, which also equals the frequency of the deletion alleles (**Table S18**).

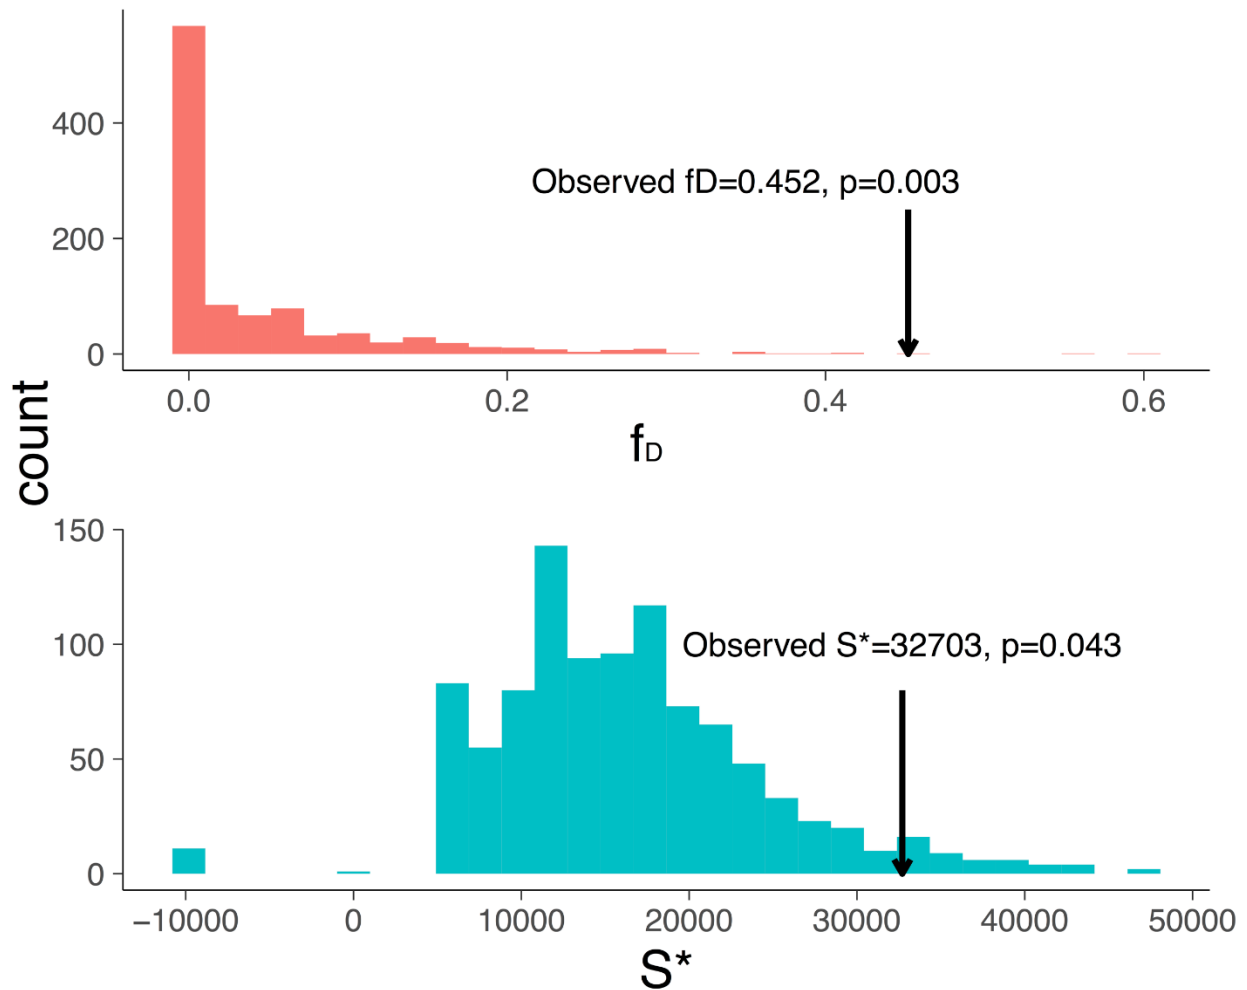

**Figure S67. Significant archaic introgression signals in Melanesians at the unique sequence of 18,500 bp at the telomeric side of *TNFRSF10D* that spans the locus of  $DEL_{MEL-NDL}$  (chr8:22,972,880-22,991,380).** Two complementary tests,  $f_D$  (top) and  $S^*$  (bottom), were used to test introgression in Melanesians. In the case of the  $f_D$  calculation, the two Neanderthal individuals were used as the archaic reference sequences. Significance levels were determined using coalescent simulations based on 1,000 demographic models (**Methods**).

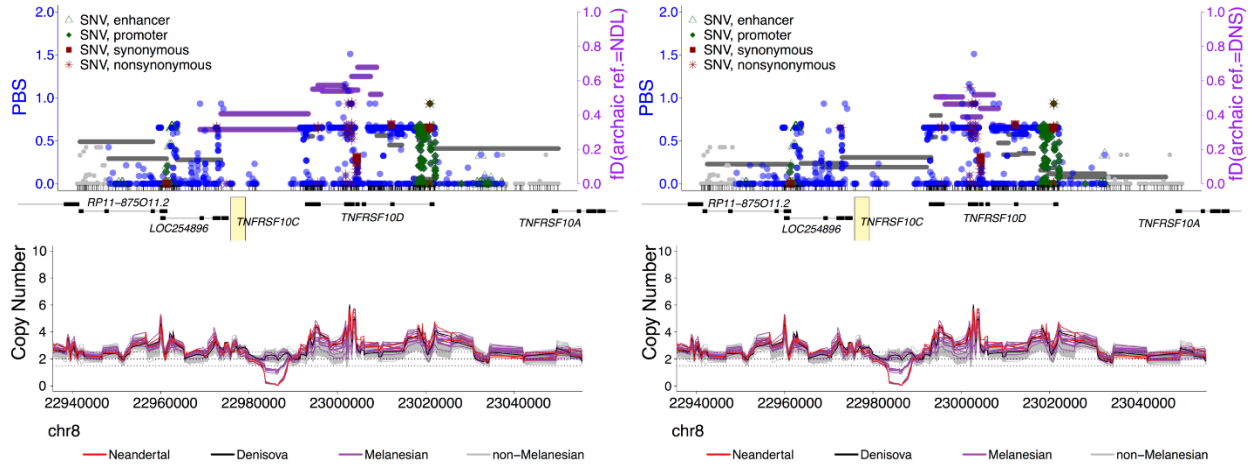

**Figure S68. Significant introgression signals ( $f_D$  statistic) at the deletion locus ( $DEL_{MEL-NDL}$ ) using Neanderthals (NDL) as the archaic reference (left panel). Note that the signals of introgression become mostly insignificant when the Denisovan individual was used as the archaic reference, but with some signals at the  $DUP_{10D}$  variant locus due to PSVs shared between Neanderthals and Denisovan samples (right panel).**

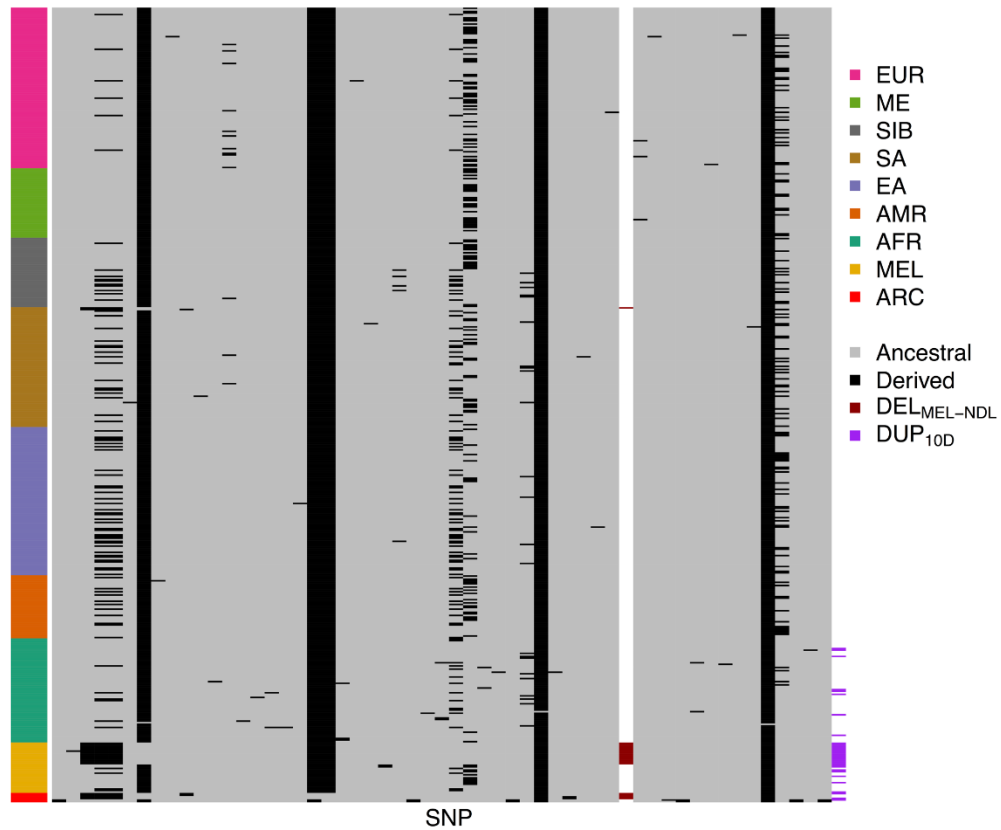

**Figure S69. Unique deletion-linked haplotype observed in Melanesians ( $n=14$ ), Neanderthals ( $n=4$ ), and South Asians (Punjabi,  $n=1$ ). Haplotypes of 56 SNVs, along with the two bi-allelic variants,  $DEL_{MEL-NDL}$  (dark red) and  $DUP_{10D}$  (purple), for chr8:22972880-22991380.**

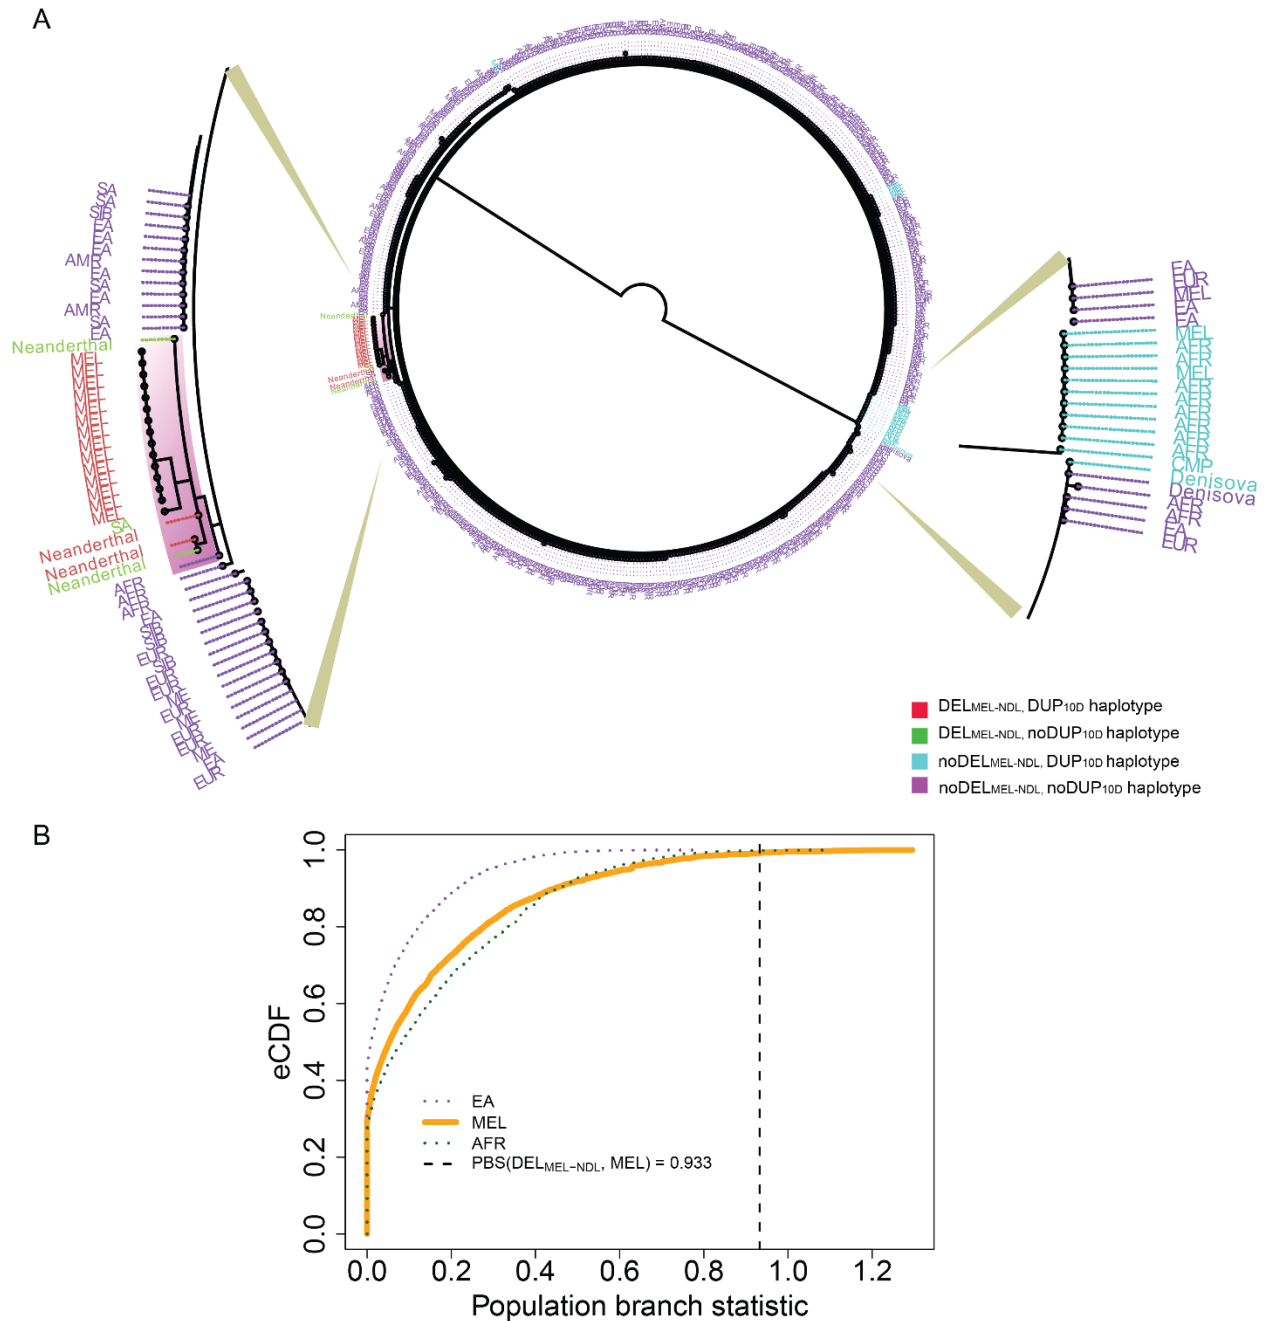

**Figure S70. A single clade for deletion-linked haplotypes and evidence for ongoing positive selection.** (A) The maximum likelihood phylogeny (top, log likelihood = -21578.402) inferred using RAxML (v.8.2.10) and the putative CN2 sequences (chr8:22972880-22991380). (B) Cumulative distribution function for *PBS* of AFR, EA, and MEL. The *PBS* distributions were generated using SNVs from the coalescent simulations for the putative CN2 regions around the  $DEL_{MEL-NDL}$  variant, conditional on frequencies within 30% of the observed frequency of the deletion variant in MEL (0.4375; 30% range: 0.306–0.568). The numbers of SNVs in AFR, EA, and MEL are 8,229, 7,684, and 7,580, respectively. Compared with all three parametric bootstrap distributions, it is unlikely to observe a *PBS* value as large as 0.933 under the null demographic models given the age of the variant ( $p < 0.0082$ ).

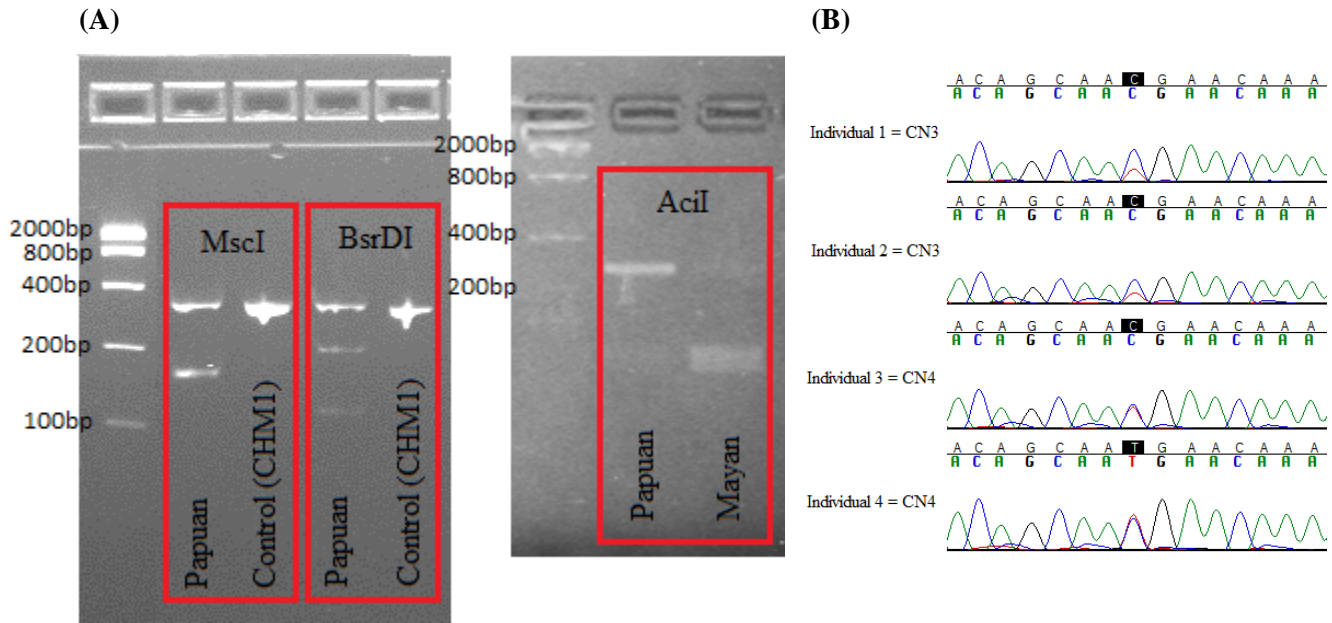

**Figure S71. PCR experiments for genotyping  $DUP_{16p12}$  polymorphism.** (A) Gel images of the restriction digests used to test for the chromosome 16 duplication. The ladder appears to the left with base pair sizes listed. The two enzymes, which cut the alternative haplotype, are shown with cuts present in the Papuan (~150 bp in MscI and ~100 and ~200 bp bands in BsrDI) and no cut in the control (bands at ~300 bp). AciI was tested with a Mayan sample as the control and shows cuts at ~150 bp and no cuts in the Papuan. (B) Sanger traces of four blood-derived Melanesian DNA samples at site 22768213 showing the variable peak height of the alternate T allele versus the reference C allele. The first two samples have half the peak height for the T allele indicating that they have only one copy of the duplication (CN3).

## Supplementary Tables

All supplementary tables are provided in separate EXCEL files and available as online tables.

**Table S1. Copy number genotypes of 5,135 CNVs in 249 modern human, 3 archaic hominin, and 72 nonhuman primate genomes.** CNVs were called in a discovery panel of 20 genomes, including 17 modern and 3 archaic humans, using the dCGH CNV discovery method as described in the main text. A read-depth-based approach was used to genotype these CNVs.

**Table S2. Copy number genotypes of 402 hominin-specific CNVs in 249 modern human, 3 archaic hominin, and 72 nonhuman primate genomes.** These CNVs were derived from the 5,135 CNV genotypes from Table S1 using the approach described in the main text and the Methods section in the Supplementary Materials.

**Table S3. 368,256 CNVs identified from 266 SGDP samples using five different callers.** Note that only Genome STRiP and dCGH produce multi-allelic CNV (mCNV) calls.

**Table S4. Validation of CNVs using single-nucleotide polymorphism (SNP) microarray.** Array-based CNV calls were generated using Illumina 2.1M SNP microarrays for 123 samples. For the purpose of validation, only CNV calls with more than 5 or 10 SNP probes were considered. Eight out of the 123 samples were removed from this analysis because they suffer large background noise as determined in (9). We examined variants that have <50% segmental duplication (SegDup) in their content.

**Table S5. Numbers of population-stratified CNVs as reported by three summary statistics.** The p-value of observing the number of stratified CNVs in each population was estimated through 10,000 non-parametric simulations of permuting the CN estimates for the 19,211 CNVs.

**Table S6. Primary three population demographic models for Africans, East Asians, and Melanesians evaluated using  $\partial a \partial i$  (Gutenkunst et al. 2009).** Assume a generation time of 29 years and mutation rate  $\mu=0.5 \times 10^{-9}$  per site per year (61). N is effective population size; T is the time of a demographic event (years); ms is symmetric migration rate, while  $m_{A-B}$  is the asymmetric migration rate from population B to A (per chromosome per generation). The parameter  $P_{\text{flip}}$  models the proportion of variants with ancestral state misidentification. \* indicates the best-fit model in this table and # indicates a model whose optimization does not converge.

**Table S7. Maximum likelihood parameter estimates and confidence intervals for the two best-fit demographic models of the population trio: AFR-EA-MEL (Figure S6).** Parameter estimates are calculated using the mutation rate of  $0.5 \times 10^{-9}$  per base per year (61) and a generation time of 29 years.  $N$  is effective population size;  $T$  is the time of a demographic event (years);  $m_s$  is symmetric migration rate, while  $m_{A-B}$  is the asymmetric migration rate from population B to A (per chromosome per generation). The parameter  $P_{\text{flip}}$  models the proportion of variants with ancestral state misidentification. 95% confidence intervals (C.I.) were estimated using Godambe information matrix (Materials and Methods).

**Table S8. Uniform (unif) priors for demographic parameters relevant to events prior to the anatomically modern humans.** Time in years and population sizes are the number of individuals.

**Table S9. CNV candidates of selection in Melanesians. Melanesian-stratified CNVs were identified using Dmedian, VST, and MWU tests.** Selection signals were inferred using SNVs from the flanking diploid sequences of candidate CNVs and the population branch statistics (*PBS*) and their significances (*p*-values) are determined using coalescent simulations. Asterisks (\*) indicate introgression signals in close proximity.

**Table S10. Top CNV candidates with archaic introgression signals in Melanesians.** Introgression signals were inferred based on the  $f_D$  statistics calculated using Neanderthal (NDL) and Denisovan (DNS) as archaic reference genomes, separately (Methods). *P*-values for selection and introgression scans are calculated using coalescent simulations. The two CNVs, indicated with †, represent a single 383 kbp duplication found specifically in the Melanesian and Denisovan samples.

**Table S11. CN estimates of DUPchr16p12 for an independent set of 242 blood-derived Melanesian DNA samples using genotypes from Sanger sequencing.**

**Table S12. Experimental CN estimates for cell line samples.** We validated CN estimates in three Melanesian and one European ancestry cell lines. These cell lines are fibroblast derived. The details of the FISH and PCR experiments can be found in Supplementary Note: Materials and Methods.

**Table S13. Fosmid and BAC clones in FISH experiments.**



**Table S14. Summary statistics for the de novo SD assembly for the DUP16p12 Melanesian duplication variant.** A Melanesian SDA contig was generated using an iteration approach with SDA (41). Each iteration used a backbone from the previous iteration to extend the assembly. The paralogous sequence variant (PSV) agreement is computed based on the overlap (left and right ends of the contig) between two assemblies from two consecutive iterations. The final ~383 kbp Melanesian duplication contig was resolved after the seventh iteration.

**Table S15. Divergence between Melanesian DUP16p12 sequences and their closest related lineages.** Melanesian sequences were sampled along the DUP16p12 sequences on the Melanesian contig (Figure S22). Homologous sequences to the Melanesian sequences were pulled from the ancestral (16p12.2, KV880768.1) and insertion loci (16p11.2, GRCh37) of DUP16p12, and 7 BAC contigs from Nuttle et al. (15).

**Table S16. Increasing the number of potential sequences (>10 kbp) for unequal crossover and potential susceptibility to rearrangement at 16p11.2 in the Melanesian contig.** Sequences (>10 kbp) from the duplication block distal to the 500 kbp autism-critical region in GRCh37 and the assembled Melanesian contig were aligned against the those proximal to the critical region in GRCh37 at 16p11.2. Only pairs with >95% identity were shown. The additional NPIP duplication sequence (MelanesianContig:1084327-1164934) in the Melanesian contig with >95% identity to that in the duplication block proximal to autism-critical region provides additional genetic material for potential unequal crossover events.

**Table S17. PCR validation of the DEL<sub>MEL-NDL</sub> deletion for 1000 Genomes Project (1KG) genomes.** 64 putative DEL<sub>MEL-NDL</sub> carriers from the 1KG (Phase 3) were identified using a read-depth-based genotyper. Validations of these samples were performed using an in-house designed PCR assay described in the main text. Note that we did not perform a PCR assay for HG01308 due to the lack of DNA for that sample.

**Table S18. Allele frequencies of seven tagging alleles to the DEL<sub>MEL-NDL</sub> deletion variant in SGDP samples.** The seven tagging SNVs are in nearly complete linkage disequilibrium with the deletion allele ( $r^2 > 0.9$  and  $D' > 0.9$ ) in the SGDP data set. Note that in all three Neanderthals, the last four SNVs were no-calls due to lack of sequence coverage. Also note that due to low sequence coverage, we did not call CNVs for the Mezmaiskaya Neanderthal.

**Table S19. Sites shared between Melanesian and Denisovan samples at the chromosome 16p12 duplication locus.** Selected sites (arbitrary site number assigned) with position on chr16 (GRCh37) and haplotype found in Papuans and Melanesians from the island of Bougainville and other control individuals, which match the reference. \*Sites that were used for further restriction digest tests.

**Table S20. Primers for the PCR assay to genotype copy number status of the 383 kbp Melanesian-Denisovan-specific duplication at its ancestral locus of chromosome 16p12.2.** Primers designed to amplify approx. 300 bp regions around the site listed in Table S17. PCR protocol used a standard PCR master mix and standard amplification protocol with 35 cycles of 95° denaturation for 45 seconds, annealing at 55° for 30 seconds, and extension at 72° for 45 seconds.

**Table S21. Primers used in the PCR assays to genotype three additional selective CNV candidates shown in Figure S11.**

## References and Notes

1. S. A. Tishkoff, F. A. Reed, A. Ranciaro, B. F. Voight, C. C. Babbitt, J. S. Silverman, K. Powell, H. M. Mortensen, J. B. Hirbo, M. Osman, M. Ibrahim, S. A. Omar, G. Lema, T. B. Nyambo, J. Ghoris, S. Bumpstead, J. K. Pritchard, G. A. Wray, P. Deloukas, Convergent adaptation of human lactase persistence in Africa and Europe. *Nat. Genet.* **39**, 31–40 (2007). [doi:10.1038/ng1946](https://doi.org/10.1038/ng1946) [Medline](#)
2. X. Yi, Y. Liang, E. Huerta-Sanchez, X. Jin, Z. X. P. Cuo, J. E. Pool, X. Xu, H. Jiang, N. Vinckenbosch, T. S. Korneliussen, H. Zheng, T. Liu, W. He, K. Li, R. Luo, X. Nie, H. Wu, M. Zhao, H. Cao, J. Zou, Y. Shan, S. Li, Q. Yang, P. Asan, P. Ni, G. Tian, J. Xu, X. Liu, T. Jiang, R. Wu, G. Zhou, M. Tang, J. Qin, T. Wang, S. Feng, G. Li, J. Huasang, J. Luosang, W. Wang, F. Chen, Y. Wang, X. Zheng, Z. Li, Z. Bianba, G. Yang, X. Wang, S. Tang, G. Gao, Y. Chen, Z. Luo, L. Gusang, Z. Cao, Q. Zhang, W. Ouyang, X. Ren, H. Liang, H. Zheng, Y. Huang, J. Li, L. Bolund, K. Kristiansen, Y. Li, Y. Zhang, X. Zhang, R. Li, S. Li, H. Yang, R. Nielsen, J. Wang, J. Wang, Sequencing of 50 human exomes reveals adaptation to high altitude. *Science* **329**, 75–78 (2010). [doi:10.1126/science.1190371](https://doi.org/10.1126/science.1190371) [Medline](#)
3. M. Fumagalli, I. Moltke, N. Grarup, F. Racimo, P. Bjerregaard, M. E. Jørgensen, T. S. Korneliussen, P. Gerbault, L. Skotte, A. Linneberg, C. Christensen, I. Brandslund, T. Jørgensen, E. Huerta-Sánchez, E. B. Schmidt, O. Pedersen, T. Hansen, A. Albrechtsen, R. Nielsen, Greenlandic Inuit show genetic signatures of diet and climate adaptation. *Science* **349**, 1343–1347 (2015). [doi:10.1126/science.aab2319](https://doi.org/10.1126/science.aab2319) [Medline](#)
4. M. A. Ilardo, I. Moltke, T. S. Korneliussen, J. Cheng, A. J. Stern, F. Racimo, P. de Barros Damgaard, M. Sikora, A. Seguin-Orlando, S. Rasmussen, I. C. L. van den Munckhof, R. Ter Horst, L. A. B. Joosten, M. G. Netea, S. Salingkat, R. Nielsen, E. Willerslev, Physiological and genetic adaptations to diving in sea nomads. *Cell* **173**, 569–580.e15 (2018). [doi:10.1016/j.cell.2018.03.054](https://doi.org/10.1016/j.cell.2018.03.054) [Medline](#)
5. F. L. Mendez, J. C. Watkins, M. F. Hammer, A haplotype at STAT2 Introgressed from neanderthals and serves as a candidate of positive selection in Papua New Guinea. *Am. J. Hum. Genet.* **91**, 265–274 (2012). [doi:10.1016/j.ajhg.2012.06.015](https://doi.org/10.1016/j.ajhg.2012.06.015) [Medline](#)
6. E. Huerta-Sánchez, X. Jin, Z. Asan, Z. Bianba, B. M. Peter, N. Vinckenbosch, Y. Liang, X. Yi, M. He, M. Somel, P. Ni, B. Wang, X. Ou, J. Huasang, J. Luosang, Z. X. Cuo, K. Li, G. Gao, Y. Yin, W. Wang, X. Zhang, X. Xu, H. Yang, Y. Li, J. Wang, J. Wang, R. Nielsen, Altitude adaptation in Tibetans caused by introgression of Denisovan-like DNA. *Nature* **512**, 194–197 (2014). [doi:10.1038/nature13408](https://doi.org/10.1038/nature13408) [Medline](#)
7. F. Racimo, D. Gokhman, M. Fumagalli, A. Ko, T. Hansen, I. Moltke, A. Albrechtsen, L. Carmel, E. Huerta-Sánchez, R. Nielsen, Archaic Adaptive Introgression in TBX15/WARS2. *Mol. Biol. Evol.* **34**, 509–524 (2017). [Medline](#)
8. D. F. Conrad, D. Pinto, R. Redon, L. Feuk, O. Gokcumen, Y. Zhang, J. Aerts, T. D. Andrews, C. Barnes, P. Campbell, T. Fitzgerald, M. Hu, C. H. Ihm, K. Kristiansson, D. G. Macarthur, J. R. Macdonald, I. Onyiah, A. W. C. Pang, S. Robson, K. Stirrups, A. Valsesia, K. Walter, J. Wei, C. Tyler-Smith, N. P. Carter, C. Lee, S. W. Scherer, M. E. Hurles; Wellcome Trust Case Control Consortium, Origins and functional impact of copy

- number variation in the human genome. *Nature* **464**, 704–712 (2010). [doi:10.1038/nature08516](https://doi.org/10.1038/nature08516) [Medline](#)
9. P. H. Sudmant, S. Mallick, B. J. Nelson, F. Hormozdiari, N. Krumm, J. Huddleston, B. P. Coe, C. Baker, S. Nordenfelt, M. Bamshad, L. B. Jorde, O. L. Posukh, H. Sahakyan, W. S. Watkins, L. Yepiskoposyan, M. S. Abdullah, C. M. Bravi, C. Capelli, T. Hervig, J. T. S. Wee, C. Tyler-Smith, G. van Driem, I. G. Romero, A. R. Jha, S. Karachanak-Yankova, D. Toncheva, D. Comas, B. Henn, T. Kivisild, A. Ruiz-Linares, A. Sajantila, E. Metspalu, J. Parik, R. Villems, E. B. Starikovskaya, G. Ayodo, C. M. Beall, A. Di Rienzo, M. F. Hammer, R. Khusainova, E. Khusnutdinova, W. Klitz, C. Winkler, D. Labuda, M. Metspalu, S. A. Tishkoff, S. Dryomov, R. Sukernik, N. Patterson, D. Reich, E. E. Eichler, Global diversity, population stratification, and selection of human copy-number variation. *Science* **349**, aab3761 (2015). [doi:10.1126/science.aab3761](https://doi.org/10.1126/science.aab3761) [Medline](#)
  10. P. H. Sudmant, T. Rausch, E. J. Gardner, R. E. Handsaker, A. Abyzov, J. Huddleston, Y. Zhang, K. Ye, G. Jun, M. H. Fritz, M. K. Konkel, A. Malhotra, A. M. Stütz, X. Shi, F. P. Casale, J. Chen, F. Hormozdiari, G. Dayama, K. Chen, M. Malig, M. J. P. Chaisson, K. Walter, S. Meiers, S. Kashin, E. Garrison, A. Auton, H. Y. K. Lam, X. J. Mu, C. Alkan, D. Antaki, T. Bae, E. Cerveira, P. Chines, Z. Chong, L. Clarke, E. Dal, L. Ding, S. Emery, X. Fan, M. Gujral, F. Kahveci, J. M. Kidd, Y. Kong, E.-W. Lameijer, S. McCarthy, P. Flicek, R. A. Gibbs, G. Marth, C. E. Mason, A. Menelaou, D. M. Muzny, B. J. Nelson, A. Noor, N. F. Parrish, M. Pendleton, A. Quitadamo, B. Raeder, E. E. Schadt, M. Romanovitch, A. Schlattl, R. Sebra, A. A. Shabalina, A. Untergasser, J. A. Walker, M. Wang, F. Yu, C. Zhang, J. Zhang, X. Zheng-Bradley, W. Zhou, T. Zichner, J. Sebat, M. A. Batzer, S. A. McCarroll, R. E. Mills, M. B. Gerstein, A. Bashir, O. Stegle, S. E. Devine, C. Lee, E. E. Eichler, J. O. Korbel; 1000 Genomes Project Consortium, An integrated map of structural variation in 2,504 human genomes. *Nature* **526**, 75–81 (2015). [doi:10.1038/nature15394](https://doi.org/10.1038/nature15394) [Medline](#)
  11. P. A. Audano, A. Sulovari, T. A. Graves-Lindsay, S. Cantsilieris, M. Sorensen, A. E. Welch, M. L. Dougherty, B. J. Nelson, A. Shah, S. K. Dutcher, W. C. Warren, V. Magrini, S. D. McGrath, Y. I. Li, R. K. Wilson, E. E. Eichler, Characterizing the major structural variant alleles of the human genome. *Cell* **176**, 663–675.e19 (2019). [doi:10.1016/j.cell.2018.12.019](https://doi.org/10.1016/j.cell.2018.12.019) [Medline](#)
  12. G. H. Perry, N. J. Dominy, K. G. Claw, A. S. Lee, H. Fiegler, R. Redon, J. Werner, F. A. Villanea, J. L. Mountain, R. Misra, N. P. Carter, C. Lee, A. C. Stone, Diet and the evolution of human amylase gene copy number variation. *Nat. Genet.* **39**, 1256–1260 (2007). [doi:10.1038/ng2123](https://doi.org/10.1038/ng2123) [Medline](#)
  13. Y. Xue, D. Sun, A. Daly, F. Yang, X. Zhou, M. Zhao, N. Huang, T. Zerjal, C. Lee, N. P. Carter, M. E. Hurles, C. Tyler-Smith, Adaptive evolution of UGT2B17 copy-number variation. *Am. J. Hum. Genet.* **83**, 337–346 (2008). [doi:10.1016/j.ajhg.2008.08.004](https://doi.org/10.1016/j.ajhg.2008.08.004) [Medline](#)
  14. R. J. Hardwick, L. R. Machado, L. W. Zuccherato, S. Antolinos, Y. Xue, N. Shawa, R. H. Gilman, L. Cabrera, D. E. Berg, C. Tyler-Smith, P. Kelly, E. Tarazona-Santos, E. J. Hollox, A worldwide analysis of beta-defensin copy number variation suggests recent selection of a high-expressing DEFB103 gene copy in East Asia. *Hum. Mutat.* **32**, 743–750 (2011). [doi:10.1002/humu.21491](https://doi.org/10.1002/humu.21491) [Medline](#)

15. X. Nuttle, G. Giannuzzi, M. H. Duyzend, J. G. Schraiber, I. Narvaiza, P. H. Sudmant, O. Penn, G. Chiatante, M. Malig, J. Huddleston, C. Benner, F. Camponeschi, S. Ciofi-Baffoni, H. A. F. Stessman, M. C. N. Marchetto, L. Denman, L. Harshman, C. Baker, A. Raja, K. Penewit, N. Janke, W. J. Tang, M. Ventura, L. Banci, F. Antonacci, J. M. Akey, C. T. Amemiya, F. H. Gage, A. Reymond, E. E. Eichler, Emergence of a Homo sapiens-specific gene family and chromosome 16p11.2 CNV susceptibility. *Nature* **536**, 205–209 (2016). [doi:10.1038/nature19075](https://doi.org/10.1038/nature19075) [Medline](#)
16. S. Lindeberg, P. Nilsson-Ehle, B. Vessby, Lipoprotein composition and serum cholesterol ester fatty acids in nonwesternized Melanesians. *Lipids* **31**, 153–158 (1996). [doi:10.1007/BF02522614](https://doi.org/10.1007/BF02522614) [Medline](#)
17. J. Flint, A. V. S. Hill, D. K. Bowden, S. J. Oppenheimer, P. R. Sill, S. W. Serjeantson, J. Bana-Koiri, K. Bhatia, M. P. Alpers, A. J. Boyce, D. J. Weatherall, J. B. Clegg, High frequencies of alpha-thalassaemia are the result of natural selection by malaria. *Nature* **321**, 744–750 (1986). [doi:10.1038/321744a0](https://doi.org/10.1038/321744a0) [Medline](#)
18. P. T. Katzmarzyk, W. R. Leonard, Climatic influences on human body size and proportions: Ecological adaptations and secular trends. *Am. J. Phys. Anthropol.* **106**, 483–503 (1998). [doi:10.1002/\(SICI\)1096-8644\(199808\)106:4<483:AID-AJPA4>3.0.CO;2-K](https://doi.org/10.1002/(SICI)1096-8644(199808)106:4<483:AID-AJPA4>3.0.CO;2-K) [Medline](#)
19. A. S. Malaspinas, M. C. Westaway, C. Muller, V. C. Sousa, O. Lao, I. Alves, A. Bergström, G. Athanasiadis, J. Y. Cheng, J. E. Crawford, T. H. Heupink, E. Macholdt, S. Peischl, S. Rasmussen, S. Schiffels, S. Subramanian, J. L. Wright, A. Albrechtsen, C. Barbieri, I. Dupanloup, A. Eriksson, A. Margaryan, I. Moltke, I. Pugach, T. S. Korneliussen, I. P. Levkivskiy, J. V. Moreno-Mayar, S. Ni, F. Racimo, M. Sikora, Y. Xue, F. A. Aghakhanian, N. Brucato, S. Brunak, P. F. Campos, W. Clark, S. Ellingvåg, G. Fourmile, P. Gerbault, D. Injie, G. Koki, M. Leavesley, B. Logan, A. Lynch, E. A. Matisoo-Smith, P. J. McAllister, A. J. Mentzer, M. Metspalu, A. B. Migliano, L. Murcha, M. E. Phipps, W. Pomat, D. Reynolds, F.-X. Ricaut, P. Siba, M. G. Thomas, T. Wales, C. M. Wall, S. J. Oppenheimer, C. Tyler-Smith, R. Durbin, J. Dortch, A. Manica, M. H. Schierup, R. A. Foley, M. M. Lahr, C. Bowern, J. D. Wall, T. Mailund, M. Stoneking, R. Nielsen, M. S. Sandhu, L. Excoffier, D. M. Lambert, E. Willerslev, A genomic history of Aboriginal Australia. *Nature* **538**, 207–214 (2016). [doi:10.1038/nature18299](https://doi.org/10.1038/nature18299) [Medline](#)
20. A. Bergström, S. J. Oppenheimer, A. J. Mentzer, K. Auckland, K. Robson, R. Attenborough, M. P. Alpers, G. Koki, W. Pomat, P. Siba, Y. Xue, M. S. Sandhu, C. Tyler-Smith, A Neolithic expansion, but strong genetic structure, in the independent history of New Guinea. *Science* **357**, 1160–1163 (2017). [doi:10.1126/science.aan3842](https://doi.org/10.1126/science.aan3842) [Medline](#)
21. D. Reich, R. E. Green, M. Kircher, J. Krause, N. Patterson, E. Y. Durand, B. Viola, A. W. Briggs, U. Stenzel, P. L. F. Johnson, T. Maricic, J. M. Good, T. Marques-Bonet, C. Alkan, Q. Fu, S. Mallick, H. Li, M. Meyer, E. E. Eichler, M. Stoneking, M. Richards, S. Talamo, M. V. Shunkov, A. P. Derevianko, J.-J. Hublin, J. Kelso, M. Slatkin, S. Pääbo, Genetic history of an archaic hominin group from Denisova Cave in Siberia. *Nature* **468**, 1053–1060 (2010). [doi:10.1038/nature09710](https://doi.org/10.1038/nature09710) [Medline](#)
22. P. Skoglund, C. Posth, K. Sirak, M. Spriggs, F. Valentin, S. Bedford, G. R. Clark, C. Reepmeyer, F. Petchey, D. Fernandes, Q. Fu, E. Harney, M. Lipson, S. Mallick, M. Novak, N. Rohland, K. Stewardson, S. Abdullah, M. P. Cox, F. R. Friedlaender, J. S.

- Friedlaender, T. Kivisild, G. Koki, P. Kusuma, D. A. Merriwether, F.-X. Ricaut, J. T. S. Wee, N. Patterson, J. Krause, R. Pinhasi, D. Reich, Genomic insights into the peopling of the Southwest Pacific. *Nature* **538**, 510–513 (2016). [doi:10.1038/nature19844](https://doi.org/10.1038/nature19844) [Medline](#)
23. B. Vernot, S. Tucci, J. Kelso, J. G. Schraiber, A. B. Wolf, R. M. Gitterman, M. Dannemann, S. Grote, R. C. McCoy, H. Norton, L. B. Scheinfeldt, D. A. Merriwether, G. Koki, J. S. Friedlaender, J. Wakefield, S. Pääbo, J. M. Akey, Excavating Neandertal and Denisovan DNA from the genomes of Melanesian individuals. *Science* **352**, 235–239 (2016). [doi:10.1126/science.aad9416](https://doi.org/10.1126/science.aad9416) [Medline](#)
24. K. Prüfer, C. de Filippo, S. Grote, F. Mafessoni, P. Korlević, M. Hajdinjak, B. Vernot, L. Skov, P. Hsieh, S. Peyrégne, D. Reher, C. Hopfe, S. Nagel, T. Maricic, Q. Fu, C. Theunert, R. Rogers, P. Skoglund, M. Chintalapati, M. Dannemann, B. J. Nelson, F. M. Key, P. Rudan, Ž. Kučan, I. Gušić, L. V. Golovanova, V. B. Doronichev, N. Patterson, D. Reich, E. E. Eichler, M. Slatkin, M. H. Schierup, A. M. Andrés, J. Kelso, M. Meyer, S. Pääbo, A high-coverage Neandertal genome from Vindija Cave in Croatia. *Science* **358**, 655–658 (2017). [doi:10.1126/science.aao1887](https://doi.org/10.1126/science.aao1887) [Medline](#)
25. M. Meyer, M. Kircher, M.-T. Gansauge, H. Li, F. Racimo, S. Mallick, J. G. Schraiber, F. Jay, K. Prüfer, C. de Filippo, P. H. Sudmant, C. Alkan, Q. Fu, R. Do, N. Rohland, A. Tandon, M. Siebauer, R. E. Green, K. Bryc, A. W. Briggs, U. Stenzel, J. Dabney, J. Shendure, J. Kitzman, M. F. Hammer, M. V. Shunkov, A. P. Derevianko, N. Patterson, A. M. Andrés, E. E. Eichler, M. Slatkin, D. Reich, J. Kelso, S. Pääbo, A high-coverage genome sequence from an archaic Denisovan individual. *Science* **338**, 222–226 (2012). [doi:10.1126/science.1224344](https://doi.org/10.1126/science.1224344) [Medline](#)
26. K. Prüfer, F. Racimo, N. Patterson, F. Jay, S. Sankararaman, S. Sawyer, A. Heinze, G. Renaud, P. H. Sudmant, C. de Filippo, H. Li, S. Mallick, M. Dannemann, Q. Fu, M. Kircher, M. Kuhlwilm, M. Lachmann, M. Meyer, M. Ongyerth, M. Siebauer, C. Theunert, A. Tandon, P. Moorjani, J. Pickrell, J. C. Mullikin, S. H. Vohr, R. E. Green, I. Hellmann, P. L. F. Johnson, H. Blanche, H. Cann, J. O. Kitzman, J. Shendure, E. E. Eichler, E. S. Lein, T. E. Bakken, L. V. Golovanova, V. B. Doronichev, M. V. Shunkov, A. P. Derevianko, B. Viola, M. Slatkin, D. Reich, J. Kelso, S. Pääbo, The complete genome sequence of a Neanderthal from the Altai Mountains. *Nature* **505**, 43–49 (2014). [doi:10.1038/nature12886](https://doi.org/10.1038/nature12886) [Medline](#)
27. S. Mallick, H. Li, M. Lipson, I. Mathieson, M. Gymrek, F. Racimo, M. Zhao, N. Chennagiri, S. Nordenfelt, A. Tandon, P. Skoglund, I. Lazaridis, S. Sankararaman, Q. Fu, N. Rohland, G. Renaud, Y. Erlich, T. Willems, C. Gallo, J. P. Spence, Y. S. Song, G. Poletti, F. Balloux, G. van Driem, P. de Knijff, I. G. Romero, A. R. Jha, D. M. Behar, C. M. Bravi, C. Capelli, T. Hervig, A. Moreno-Estrada, O. L. Posukh, E. Balanovska, O. Balanovsky, S. Karachanak-Yankova, H. Sahakyan, D. Toncheva, L. Yepiskoposyan, C. Tyler-Smith, Y. Xue, M. S. Abdullah, A. Ruiz-Linares, C. M. Beall, A. Di Rienzo, C. Jeong, E. B. Starikovskaya, E. Metspalu, J. Parik, R. Villems, B. M. Henn, U. Hodoglugil, R. Mahley, A. Sajantila, G. Stamatoyannopoulos, J. T. S. Wee, R. Khusainova, E. Khusnutdinova, S. Litvinov, G. Ayodo, D. Comas, M. F. Hammer, T. Kivisild, W. Klitz, C. A. Winkler, D. Labuda, M. Bamshad, L. B. Jorde, S. A. Tishkoff, W. S. Watkins, M. Metspalu, S. Dryomov, R. Sukernik, L. Singh, K. Thangaraj, S. Pääbo, J. Kelso, N. Patterson, D. Reich, The Simons Genome Diversity Project: 300

genomes from 142 diverse populations. *Nature* **538**, 201–206 (2016).  
[doi:10.1038/nature18964](https://doi.org/10.1038/nature18964) [Medline](#)

28. J. Prado-Martinez, P. H. Sudmant, J. M. Kidd, H. Li, J. L. Kelley, B. Lorente-Galdos, K. R. Veeramah, A. E. Woerner, T. D. O'Connor, G. Santpere, A. Cagan, C. Theunert, F. Casals, H. Laayouni, K. Munch, A. Hobolth, A. E. Halager, M. Malig, J. Hernandez-Rodriguez, I. Hernando-Herraez, K. Prüfer, M. Pybus, L. Johnstone, M. Lachmann, C. Alkan, D. Twigg, N. Petit, C. Baker, F. Hormozdiari, M. Fernandez-Callejo, M. Dabad, M. L. Wilson, L. Stevison, C. Camprubí, T. Carvalho, A. Ruiz-Herrera, L. Vives, M. Mele, T. Abello, I. Kondova, R. E. Bontrop, A. Pusey, F. Lankester, J. A. Kiyang, R. A. Bergl, E. Lonsdorf, S. Myers, M. Ventura, P. Gagneux, D. Comas, H. Siegismund, J. Blanc, L. Agueda-Calpena, M. Gut, L. Fulton, S. A. Tishkoff, J. C. Mullikin, R. K. Wilson, I. G. Gut, M. K. Gonder, O. A. Ryder, B. H. Hahn, A. Navarro, J. M. Akey, J. Bertranpetit, D. Reich, T. Mailund, M. H. Schierup, C. Hvilsom, A. M. Andrés, J. D. Wall, C. D. Bustamante, M. F. Hammer, E. E. Eichler, T. Marques-Bonet, Great ape genetic diversity and population history. *Nature* **499**, 471–475 (2013).  
[doi:10.1038/nature12228](https://doi.org/10.1038/nature12228) [Medline](#)
29. Materials and methods are available as supplementary materials.
30. S. H. Martin, J. W. Davey, C. D. Jiggins, Evaluating the use of ABBA-BABA statistics to locate introgressed loci. *Mol. Biol. Evol.* **32**, 244–257 (2015).  
[doi:10.1093/molbev/msu269](https://doi.org/10.1093/molbev/msu269) [Medline](#)
31. V. Tillander, S. E. H. Alexson, D. E. Cohen, Deactivating Fatty Acids: Acyl-CoA Thioesterase-Mediated Control of Lipid Metabolism. *Trends Endocrinol. Metab.* **28**, 473–484 (2017). [doi:10.1016/j.tem.2017.03.001](https://doi.org/10.1016/j.tem.2017.03.001) [Medline](#)
32. J. M. Kidd, T. L. Newman, E. Tuzun, R. Kaul, E. E. Eichler, Population stratification of a common APOBEC gene deletion polymorphism. *PLOS Genet.* **3**, e63 (2007).  
[doi:10.1371/journal.pgen.0030063](https://doi.org/10.1371/journal.pgen.0030063) [Medline](#)
33. P. An, R. Johnson, J. Phair, G. D. Kirk, X.-F. Yu, S. Donfield, S. Buchbinder, J. J. Goedert, C. A. Winkler, APOBEC3B deletion and risk of HIV-1 acquisition. *J. Infect. Dis.* **200**, 1054–1058 (2009). [doi:10.1086/605644](https://doi.org/10.1086/605644) [Medline](#)
34. N. J. Smith, T. R. Fenton, The APOBEC3 genes and their role in cancer: Insights from human papillomavirus. *J. Mol. Endocrinol.* **62**, R269–R287 (2019). [doi:10.1530/JME-19-0011](https://doi.org/10.1530/JME-19-0011) [Medline](#)
35. Y. Y. Qi, X. J. Zhou, F. J. Cheng, P. Hou, L. Zhu, S. F. Shi, L. J. Liu, J. C. Lv, H. Zhang, DEFA gene variants associated with IgA nephropathy in a Chinese population. *Genes Immun.* **16**, 231–237 (2015). [doi:10.1038/gene.2015.1](https://doi.org/10.1038/gene.2015.1) [Medline](#)
36. K. Mohajeri, S. Cantsilieris, J. Huddleston, B. J. Nelson, B. P. Coe, C. D. Campbell, C. Baker, L. Harshman, K. M. Munson, Z. N. Kronenberg, M. Kremitzki, A. Raja, C. R. Catachchio, T. A. Graves, R. K. Wilson, M. Ventura, E. E. Eichler, Interchromosomal core duplicons drive both evolutionary instability and disease susceptibility of the Chromosome 8p23.1 region. *Genome Res.* **26**, 1453–1467 (2016).  
[doi:10.1101/gr.211284.116](https://doi.org/10.1101/gr.211284.116) [Medline](#)

37. K. M. Steinberg, F. Antonacci, P. H. Sudmant, J. M. Kidd, C. D. Campbell, L. Vives, M. Malig, L. Scheinfeldt, W. Beggs, M. Ibrahim, G. Lema, T. B. Nyambo, S. A. Omar, J.-M. Bodo, A. Froment, M. P. Donnelly, K. K. Kidd, S. A. Tishkoff, E. E. Eichler, Structural diversity and African origin of the 17q21.31 inversion polymorphism. *Nat. Genet.* **44**, 872–880 (2012). [doi:10.1038/ng.2335](https://doi.org/10.1038/ng.2335) [Medline](#)
38. H. Stefansson, A. Helgason, G. Thorleifsson, V. Steinthorsdottir, G. Masson, J. Barnard, A. Baker, A. Jonasdottir, A. Ingason, V. G. Gudnadottir, N. Desnica, A. Hicks, A. Gylfason, D. F. Gudbjartsson, G. M. Jonsdottir, J. Sainz, K. Agnarsson, B. Birgisdottir, S. Ghosh, A. Olafsdottir, J.-B. Cazier, K. Kristjansson, M. L. Frigge, T. E. Thorgeirsson, J. R. Gulcher, A. Kong, K. Stefansson, A common inversion under selection in Europeans. *Nat. Genet.* **37**, 129–137 (2005). [doi:10.1038/ng1508](https://doi.org/10.1038/ng1508) [Medline](#)
39. F. Antonacci, J. M. Kidd, T. Marques-Bonet, B. Teague, M. Ventura, S. Girirajan, C. Alkan, C. D. Campbell, L. Vives, M. Malig, J. A. Rosenfeld, B. C. Ballif, L. G. Shaffer, T. A. Graves, R. K. Wilson, D. C. Schwartz, E. E. Eichler, A large and complex structural polymorphism at 16p12.1 underlies microdeletion disease risk. *Nat. Genet.* **42**, 745–750 (2010). [doi:10.1038/ng.643](https://doi.org/10.1038/ng.643) [Medline](#)
40. L. A. Weiss, Y. Shen, J. M. Korn, D. E. Arking, D. T. Miller, R. Fossdal, E. Saemundsen, H. Stefansson, M. A. R. Ferreira, T. Green, O. S. Platt, D. M. Ruderfer, C. A. Walsh, D. Altshuler, A. Chakravarti, R. E. Tanzi, K. Stefansson, S. L. Santangelo, J. F. Gusella, P. Sklar, B.-L. Wu, M. J. Daly; Autism Consortium, Association between microdeletion and microduplication at 16p11.2 and autism. *N. Engl. J. Med.* **358**, 667–675 (2008). [doi:10.1056/NEJMoa075974](https://doi.org/10.1056/NEJMoa075974) [Medline](#)
41. M. R. Vollger, P. C. Dishuck, M. Sorensen, A. E. Welch, V. Dang, M. L. Dougherty, T. A. Graves-Lindsay, R. K. Wilson, M. J. P. Chaisson, E. E. Eichler, Long-read sequence and assembly of segmental duplications. *Nat. Methods* **16**, 88–94 (2019). [doi:10.1038/s41592-018-0236-3](https://doi.org/10.1038/s41592-018-0236-3) [Medline](#)
42. M. E. Johnson, L. Viggiano, J. A. Bailey, M. Abdul-Rauf, G. Goodwin, M. Rocchi, E. E. Eichler, Positive selection of a gene family during the emergence of humans and African apes. *Nature* **413**, 514–519 (2001). [doi:10.1038/35097067](https://doi.org/10.1038/35097067) [Medline](#)
43. Z. Yang, PAML 4: Phylogenetic analysis by maximum likelihood. *Mol. Biol. Evol.* **24**, 1586–1591 (2007). [doi:10.1093/molbev/msm088](https://doi.org/10.1093/molbev/msm088) [Medline](#)
44. B. P. Coe, H. A. F. Stessman, A. Sulovari, M. R. Geisheker, T. E. Bakken, A. M. Lake, J. D. Dougherty, E. S. Lein, F. Hormozdiari, R. A. Bernier, E. E. Eichler, Neurodevelopmental disease genes implicated by de novo mutation and copy number variation morbidity. *Nat. Genet.* **51**, 106–116 (2019). [doi:10.1038/s41588-018-0288-4](https://doi.org/10.1038/s41588-018-0288-4) [Medline](#)
45. G. Pan, J. Ni, G. Yu, Y. F. Wei, V. M. Dixit, TRUNDD, a new member of the TRAIL receptor family that antagonizes TRAIL signalling. *FEBS Lett.* **424**, 41–45 (1998). [doi:10.1016/S0014-5793\(98\)00135-5](https://doi.org/10.1016/S0014-5793(98)00135-5) [Medline](#)
46. A. Scally, J. Y. Dutheil, L. W. Hillier, G. E. Jordan, I. Goodhead, J. Herrero, A. Hobolth, T. Lappalainen, T. Mailund, T. Marques-Bonet, S. McCarthy, S. H. Montgomery, P. C. Schwalie, Y. A. Tang, M. C. Ward, Y. Xue, B. Yngvadottir, C. Alkan, L. N. Andersen, Q. Ayub, E. V. Ball, K. Beal, B. J. Bradley, Y. Chen, C. M. Clee, S. Fitzgerald, T. A. Graves, Y. Gu, P. Heath, A. Heger, E. Karakoc, A. Kolb-Kokocinski, G. K. Laird, G.



- Lunter, S. Meader, M. Mort, J. C. Mullikin, K. Munch, T. D. O'Connor, A. D. Phillips, J. Prado-Martinez, A. S. Rogers, S. Sajjadian, D. Schmidt, K. Shaw, J. T. Simpson, P. D. Stenson, D. J. Turner, L. Vigilant, A. J. Vilella, W. Whitener, B. Zhu, D. N. Cooper, P. de Jong, E. T. Dermitzakis, E. E. Eichler, P. Flicek, N. Goldman, N. I. Mundy, Z. Ning, D. T. Odom, C. P. Ponting, M. A. Quail, O. A. Ryder, S. M. Searle, W. C. Warren, R. K. Wilson, M. H. Schierup, J. Rogers, C. Tyler-Smith, R. Durbin, Insights into hominid evolution from the gorilla genome sequence. *Nature* **483**, 169–175 (2012). [doi:10.1038/nature10842](https://doi.org/10.1038/nature10842) [Medline](#)
47. D. A. Pollard, V. N. Iyer, A. M. Moses, M. B. Eisen, Widespread discordance of gene trees with species tree in *Drosophila*: Evidence for incomplete lineage sorting. *PLOS Genet.* **2**, e173 (2006). [doi:10.1371/journal.pgen.0020173](https://doi.org/10.1371/journal.pgen.0020173) [Medline](#)
48. M. Florio, M. Heide, A. Pinson, H. Brandl, M. Albert, S. Winkler, P. Wimberger, W. B. Huttner, M. Hiller, Evolution and cell-type specificity of human-specific genes preferentially expressed in progenitors of fetal neocortex. *eLife* **7**, e32332 (2018). [doi:10.7554/eLife.32332](https://doi.org/10.7554/eLife.32332) [Medline](#)
49. V. Plagnol, J. D. Wall, Possible ancestral structure in human populations. *PLOS Genet.* **2**, e105 (2006). [doi:10.1371/journal.pgen.0020105](https://doi.org/10.1371/journal.pgen.0020105) [Medline](#)
50. R. N. Gutenkunst, R. D. Hernandez, S. H. Williamson, C. D. Bustamante, Inferring the joint demographic history of multiple populations from multidimensional SNP frequency data. *PLOS Genet.* **5**, e1000695 (2009). [doi:10.1371/journal.pgen.1000695](https://doi.org/10.1371/journal.pgen.1000695) [Medline](#)
51. D. H. Alexander, J. Novembre, K. Lange, Fast model-based estimation of ancestry in unrelated individuals. *Genome Res.* **19**, 1655–1664 (2009). [doi:10.1101/gr.094052.109](https://doi.org/10.1101/gr.094052.109) [Medline](#)
52. M. L. Dougherty, J. G. Underwood, B. J. Nelson, E. Tseng, K. M. Munson, O. Penn, T. J. Nowakowski, A. A. Pollen, E. E. Eichler, Transcriptional fates of human-specific segmental duplications in brain. *Genome Res.* **28**, 1566–1576 (2018). [doi:10.1101/gr.237610.118](https://doi.org/10.1101/gr.237610.118) [Medline](#)
53. Z. N. Kronenberg, I. T. Fiddes, D. Gordon, S. Murali, S. Cantsilieris, O. S. Meyerson, J. G. Underwood, B. J. Nelson, M. J. P. Chaisson, M. L. Dougherty, K. M. Munson, A. R. Hastie, M. Diekhans, F. Hormozdiari, N. Lorusso, K. Hoekzema, R. Qiu, K. Clark, A. Raja, A. E. Welch, M. Sorensen, C. Baker, R. S. Fulton, J. Armstrong, T. A. Graves-Lindsay, A. M. Denli, E. R. Hoppe, P. Hsieh, C. M. Hill, A. W. C. Pang, J. Lee, E. T. Lam, S. K. Dutcher, F. H. Gage, W. C. Warren, J. Shendure, D. Haussler, V. A. Schneider, H. Cao, M. Ventura, R. K. Wilson, B. Paten, A. Pollen, E. E. Eichler, High-resolution comparative analysis of great ape genomes. *Science* **360**, eaar6343 (2018). [doi:10.1126/science.aar6343](https://doi.org/10.1126/science.aar6343) [Medline](#)
54. P. H. Sudmant, J. O. Kitzman, F. Antonacci, C. Alkan, M. Malig, A. Tsalenko, N. Sampas, L. Bruhn, J. Shendure, E. E. Eichler; 1000 Genomes Project, Diversity of human copy number variation and multicopy genes. *Science* **330**, 641–646 (2010). [doi:10.1126/science.1197005](https://doi.org/10.1126/science.1197005) [Medline](#)
55. Z. N. Kronenberg, E. J. Osborne, K. R. Cone, B. J. Kennedy, E. T. Domyan, M. D. Shapiro, N. C. Elde, M. Yandell, Wham: Identifying structural variants of biological consequence. *PLOS Comput. Biol.* **11**, e1004572 (2015). [doi:10.1371/journal.pcbi.1004572](https://doi.org/10.1371/journal.pcbi.1004572) [Medline](#)

56. R. M. Layer, C. Chiang, A. R. Quinlan, I. M. Hall, LUMPY: A probabilistic framework for structural variant discovery. *Genome Biol.* **15**, R84 (2014). [doi:10.1186/gb-2014-15-6-r84](https://doi.org/10.1186/gb-2014-15-6-r84) [Medline](#)
57. T. Rausch, T. Zichner, A. Schlattl, A. M. Stütz, V. Benes, J. O. Korbel, DELLY: Structural variant discovery by integrated paired-end and split-read analysis. *Bioinformatics* **28**, i333–i339 (2012). [doi:10.1093/bioinformatics/bts378](https://doi.org/10.1093/bioinformatics/bts378) [Medline](#)
58. R. E. Handsaker, V. Van Doren, J. R. Berman, G. Genovese, S. Kashin, L. M. Boettger, S. A. McCarroll, Large multiallelic copy number variations in humans. *Nat. Genet.* **47**, 296–303 (2015). [doi:10.1038/ng.3200](https://doi.org/10.1038/ng.3200) [Medline](#)
59. F. Hach, F. Hormozdiari, C. Alkan, F. Hormozdiari, I. Birol, E. E. Eichler, S. C. Sahinalp, mrsFAST: A cache-oblivious algorithm for short-read mapping. *Nat. Methods* **7**, 576–577 (2010). [doi:10.1038/nmeth0810-576](https://doi.org/10.1038/nmeth0810-576) [Medline](#)
60. A. J. Coffman, P. H. Hsieh, S. Gravel, R. N. Gutenkunst, Computationally Efficient Composite Likelihood Statistics for Demographic Inference. *Mol. Biol. Evol.* **33**, 591–593 (2016). [doi:10.1093/molbev/msv255](https://doi.org/10.1093/molbev/msv255) [Medline](#)
61. A. Scally, The mutation rate in human evolution and demographic inference. *Curr. Opin. Genet. Dev.* **41**, 36–43 (2016). [doi:10.1016/j.gde.2016.07.008](https://doi.org/10.1016/j.gde.2016.07.008) [Medline](#)
62. G. K. Chen, P. Marjoram, J. D. Wall, Fast and flexible simulation of DNA sequence data. *Genome Res.* **19**, 136–142 (2009). [doi:10.1101/gr.083634.108](https://doi.org/10.1101/gr.083634.108) [Medline](#)
63. P. Hsieh, K. R. Veeramah, J. Lachance, S. A. Tishkoff, J. D. Wall, M. F. Hammer, R. N. Gutenkunst, Whole-genome sequence analyses of Western Central African Pygmy hunter-gatherers reveal a complex demographic history and identify candidate genes under positive natural selection. *Genome Res.* **26**, 279–290 (2016). [doi:10.1101/gr.192971.115](https://doi.org/10.1101/gr.192971.115) [Medline](#)
64. K. A. Frazer, D. G. Ballinger, D. R. Cox, D. A. Hinds, L. L. Stuve, R. A. Gibbs, J. W. Belmont, A. Boudreau, P. Hardenbol, S. M. Leal, S. Pasternak, D. A. Wheeler, T. D. Willis, F. Yu, H. Yang, C. Zeng, Y. Gao, H. Hu, W. Hu, C. Li, W. Lin, S. Liu, H. Pan, X. Tang, J. Wang, W. Wang, J. Yu, B. Zhang, Q. Zhang, H. Zhao, H. Zhao, J. Zhou, S. B. Gabriel, R. Barry, B. Blumenstiel, A. Camargo, M. Defelice, M. Faggart, M. Goyette, S. Gupta, J. Moore, H. Nguyen, R. C. Onofrio, M. Parkin, J. Roy, E. Stahl, E. Winchester, L. Ziaugra, D. Altshuler, Y. Shen, Z. Yao, W. Huang, X. Chu, Y. He, L. Jin, Y. Liu, Y. Shen, W. Sun, H. Wang, Y. Wang, Y. Wang, X. Xiong, L. Xu, M. M. Wayne, S. K. Tsui, H. Xue, J. T. Wong, L. M. Galver, J. B. Fan, K. Gunderson, S. S. Murray, A. R. Oliphant, M. S. Chee, A. Montpetit, F. Chagnon, V. Ferretti, M. Leboeuf, J. F. Olivier, M. S. Phillips, S. Roumy, C. Sallée, A. Verner, T. J. Hudson, P. Y. Kwok, D. Cai, D. C. Koboldt, R. D. Miller, L. Pawlikowska, P. Taillon-Miller, M. Xiao, L. C. Tsui, W. Mak, Y. Q. Song, P. K. Tam, Y. Nakamura, T. Kawaguchi, T. Kitamoto, T. Morizono, A. Nagashima, Y. Ohnishi, A. Sekine, T. Tanaka, T. Tsunoda, P. Deloukas, C. P. Bird, M. Delgado, E. T. Dermitzakis, R. Gwilliam, S. Hunt, J. Morrison, D. Powell, B. E. Stranger, P. Whittaker, D. R. Bentley, M. J. Daly, P. I. de Bakker, J. Barrett, Y. R. Chretien, J. Maller, S. McCarroll, N. Patterson, I. Pe'er, A. Price, S. Purcell, D. J. Richter, P. Sabeti, R. Saxena, S. F. Schaffner, P. C. Sham, P. Varilly, D. Altshuler, L. D. Stein, L. Krishnan, A. V. Smith, M. K. Tello-Ruiz, G. A. Thorisson, A. Chakravarti, P. E.

- Chen, D. J. Cutler, C. S. Kashuk, S. Lin, G. R. Abecasis, W. Guan, Y. Li, H. M. Munro, Z. S. Qin, D. J. Thomas, G. McVean, A. Auton, L. Bottolo, N. Cardin, S. Eyheramendy, C. Freeman, J. Marchini, S. Myers, C. Spencer, M. Stephens, P. Donnelly, L. R. Cardon, G. Clarke, D. M. Evans, A. P. Morris, B. S. Weir, T. Tsunoda, J. C. Mullikin, S. T. Sherry, M. Feolo, A. Skol, H. Zhang, C. Zeng, H. Zhao, I. Matsuda, Y. Fukushima, D. R. Macer, E. Suda, C. N. Rotimi, C. A. Adebamowo, I. Ajayi, T. Aniagwu, P. A. Marshall, C. Nkwodimmah, C. D. Royal, M. F. Leppert, M. Dixon, A. Peiffer, R. Qiu, A. Kent, K. Kato, N. Niikawa, I. F. Adewole, B. M. Knoppers, M. W. Foster, E. W. Clayton, J. Watkin, R. A. Gibbs, J. W. Belmont, D. Muzny, L. Nazareth, E. Sodergren, G. M. Weinstock, D. A. Wheeler, I. Yakub, S. B. Gabriel, R. C. Onofrio, D. J. Richter, L. Ziaugra, B. W. Birren, M. J. Daly, D. Altshuler, R. K. Wilson, L. L. Fulton, J. Rogers, J. Burton, N. P. Carter, C. M. Clee, M. Griffiths, M. C. Jones, K. McLay, R. W. Plumb, M. T. Ross, S. K. Sims, D. L. Willey, Z. Chen, H. Han, L. Kang, M. Godbout, J. C. Wallenburg, P. L'Archevêque, G. Bellemare, K. Saeki, H. Wang, D. An, H. Fu, Q. Li, Z. Wang, R. Wang, A. L. Holden, L. D. Brooks, J. E. McEwen, M. S. Guyer, V. O. Wang, J. L. Peterson, M. Shi, J. Spiegel, L. M. Sung, L. F. Zacharia, F. S. Collins, K. Kennedy, R. Jamieson, J. Stewart; International HapMap Consortium, A second generation human haplotype map of over 3.1 million SNPs. *Nature* **449**, 851–861 (2007). [doi:10.1038/nature06258](https://doi.org/10.1038/nature06258) [Medline](#)
65. K. E. Langergraber, K. Prüfer, C. Rowney, C. Boesch, C. Crockford, K. Fawcett, E. Inoue, M. Inoue-Muruyama, J. C. Mitani, M. N. Muller, M. M. Robbins, G. Schubert, T. S. Stoinski, B. Viola, D. Watts, R. M. Wittig, R. W. Wrangham, K. Zuberbühler, S. Pääbo, L. Vigilant, Generation times in wild chimpanzees and gorillas suggest earlier divergence times in great ape and human evolution. *Proc. Natl. Acad. Sci. U.S.A.* **109**, 15716–15721 (2012). [doi:10.1073/pnas.1211740109](https://doi.org/10.1073/pnas.1211740109) [Medline](#)
66. R. Redon, S. Ishikawa, K. R. Fitch, L. Feuk, G. H. Perry, T. D. Andrews, H. Fiegler, M. H. Shapero, A. R. Carson, W. Chen, E. K. Cho, S. Dallaire, J. L. Freeman, J. R. González, M. Gratacòs, J. Huang, D. Kalaitzopoulos, D. Komura, J. R. MacDonald, C. R. Marshall, R. Mei, L. Montgomery, K. Nishimura, K. Okamura, F. Shen, M. J. Somerville, J. Tchinda, A. Valsesia, C. Woodwark, F. Yang, J. Zhang, T. Zerjal, J. Zhang, L. Armengol, D. F. Conrad, X. Estivill, C. Tyler-Smith, N. P. Carter, H. Aburatani, C. Lee, K. W. Jones, S. W. Scherer, M. E. Hurles, Global variation in copy number in the human genome. *Nature* **444**, 444–454 (2006). [doi:10.1038/nature05329](https://doi.org/10.1038/nature05329) [Medline](#)
67. P. C. Sabeti, D. E. Reich, J. M. Higgins, H. Z. P. Levine, D. J. Richter, S. F. Schaffner, S. B. Gabriel, J. V. Platko, N. J. Patterson, G. J. McDonald, H. C. Ackerman, S. J. Campbell, D. Altshuler, R. Cooper, D. Kwiatkowski, R. Ward, E. S. Lander, Detecting recent positive selection in the human genome from haplotype structure. *Nature* **419**, 832–837 (2002). [doi:10.1038/nature01140](https://doi.org/10.1038/nature01140) [Medline](#)
68. S. R. Browning, B. L. Browning, Rapid and accurate haplotype phasing and missing-data inference for whole-genome association studies by use of localized haplotype clustering. *Am. J. Hum. Genet.* **81**, 1084–1097 (2007). [doi:10.1086/521987](https://doi.org/10.1086/521987) [Medline](#)
69. R. Thomson, J. K. Pritchard, P. Shen, P. J. Oefner, M. W. Feldman, Recent common ancestry of human Y chromosomes: Evidence from DNA sequence data. *Proc. Natl. Acad. Sci. U.S.A.* **97**, 7360–7365 (2000). [doi:10.1073/pnas.97.13.7360](https://doi.org/10.1073/pnas.97.13.7360) [Medline](#)

70. A. Stamatakis, RAxML-VI-HPC: Maximum likelihood-based phylogenetic analyses with thousands of taxa and mixed models. *Bioinformatics* **22**, 2688–2690 (2006). [doi:10.1093/bioinformatics/btl446](https://doi.org/10.1093/bioinformatics/btl446) [Medline](#)
71. R. Bouckaert, J. Heled, D. Kühnert, T. Vaughan, C.-H. Wu, D. Xie, M. A. Suchard, A. Rambaut, A. J. Drummond, BEAST 2: A software platform for Bayesian evolutionary analysis. *PLOS Comput. Biol.* **10**, e1003537 (2014). [doi:10.1371/journal.pcbi.1003537](https://doi.org/10.1371/journal.pcbi.1003537) [Medline](#)
72. K. Katoh, D. M. Standley, MAFFT multiple sequence alignment software version 7: Improvements in performance and usability. *Mol. Biol. Evol.* **30**, 772–780 (2013). [doi:10.1093/molbev/mst010](https://doi.org/10.1093/molbev/mst010) [Medline](#)
73. M. Suyama, D. Torrents, P. Bork, PAL2NAL: Robust conversion of protein sequence alignments into the corresponding codon alignments. *Nucleic Acids Res.* **34** (suppl. 2), W609–W612 (2006). [doi:10.1093/nar/gkl315](https://doi.org/10.1093/nar/gkl315) [Medline](#)
74. K. Tamura, J. Dudley, M. Nei, S. Kumar, MEGA4: Molecular Evolutionary Genetics Analysis (MEGA) software version 4.0. *Mol. Biol. Evol.* **24**, 1596–1599 (2007). [doi:10.1093/molbev/msm092](https://doi.org/10.1093/molbev/msm092) [Medline](#)
75. V. Lulla, A. M. Dinan, M. Hosmillo, Y. Chaudhry, L. Sherry, N. Irigoyen, K. M. Nayak, N. J. Stonehouse, M. Zilbauer, I. Goodfellow, A. E. Firth, An upstream protein-coding region in enteroviruses modulates virus infection in gut epithelial cells. *Nat. Microbiol.* **4**, 280–292 (2019). [doi:10.1038/s41564-018-0297-1](https://doi.org/10.1038/s41564-018-0297-1) [Medline](#)
76. Z. Yang, Likelihood ratio tests for detecting positive selection and application to primate lysozyme evolution. *Mol. Biol. Evol.* **15**, 568–573 (1998). [doi:10.1093/oxfordjournals.molbev.a025957](https://doi.org/10.1093/oxfordjournals.molbev.a025957) [Medline](#)
77. P. Lichter, S. A. Ledbetter, D. H. Ledbetter, D. C. Ward, Fluorescence in situ hybridization with Alu and L1 polymerase chain reaction probes for rapid characterization of human chromosomes in hybrid cell lines. *Proc. Natl. Acad. Sci. U.S.A.* **87**, 6634–6638 (1990). [doi:10.1073/pnas.87.17.6634](https://doi.org/10.1073/pnas.87.17.6634) [Medline](#)
78. B. S. Weir, C. C. Cockerham, Estimating F-Statistics for the Analysis of Population Structure. *Evolution* **38**, 1358–1370 (1984). [Medline](#)
79. F. Tajima, Statistical method for testing the neutral mutation hypothesis by DNA polymorphism. *Genetics* **123**, 585–595 (1989). [Medline](#)
80. F. Antonacci, J. M. Kidd, T. Marques-Bonet, M. Ventura, P. Siswara, Z. Jiang, E. E. Eichler, Characterization of six human disease-associated inversion polymorphisms. *Hum. Mol. Genet.* **18**, 2555–2566 (2009). [doi:10.1093/hmg/ddp187](https://doi.org/10.1093/hmg/ddp187) [Medline](#)
